# Supplementary material for: RNA Modification Level Estimation with pulseR
Source: Genes (Basel). 2018 Dec 10;9(12):619. doi: 10.3390/genes9120619 (PMC6316556; doi:10.3390/genes9120619)
Supplement: Supplementary file 1 [file genes-09-00619-s001.tgz]

Archive with 42 entries (33 files):
- supplement
- supplement/mapping
- supplement/run-prepare-data.R
- supplement/GM12878.yaml
- supplement/LICENSE
- supplement/supplementary_figures.pdf
- supplement/H1-ESC.yaml
- supplement/README.md
- supplement/run-epitranscriptomics-pipeline.R
- supplement/compare_with_published.ipynb
- supplement/data
- supplement/results-with-spike-ins
- supplement/results-without-spike-ins
- supplement/compare_with_pulseR.ipynb
- supplement/results-without-spike-ins/H1-ESC
- supplement/results-without-spike-ins/GM12878
- supplement/results-without-spike-ins/GM12878/opts.rds
- supplement/results-without-spike-ins/GM12878/pd.rds
- supplement/results-without-spike-ins/GM12878/cis.rds
- supplement/results-without-spike-ins/GM12878/fit.rds
- supplement/results-without-spike-ins/H1-ESC/opts.rds
- supplement/results-without-spike-ins/H1-ESC/pd.rds
- supplement/results-without-spike-ins/H1-ESC/cis.rds
- supplement/results-without-spike-ins/H1-ESC/fit.rds
- supplement/results-with-spike-ins/H1-ESC
- supplement/results-with-spike-ins/GM12878
- supplement/results-with-spike-ins/GM12878/opts.rds
- supplement/results-with-spike-ins/GM12878/pd.rds
- supplement/results-with-spike-ins/GM12878/cis.rds
- supplement/results-with-spike-ins/GM12878/fit.rds
- supplement/results-with-spike-ins/H1-ESC/opts.rds
- supplement/results-with-spike-ins/H1-ESC/pd.rds
- supplement/results-with-spike-ins/H1-ESC/cis.rds
- supplement/results-with-spike-ins/H1-ESC/fit.rds
- supplement/data/samples.rds
- supplement/data/counts-ERCC.rds
- supplement/data/counts-H1-ESC.rds
- supplement/data/counts-GM12878.rds
- supplement/mapping/sra_result.csv
- supplement/mapping/gene_count_matrix.csv
- supplement/mapping/supplement.xlsx
- supplement/mapping/run_laic.txt
