# Supplementary material for: RNA Modification Level Estimation with pulseR
Source: Genes (Basel). 2018 Dec 10;9(12):619. doi: 10.3390/genes9120619 (PMC6316556; doi:10.3390/genes9120619)
Supplement: Supplementary file 1 [file genes-09-00619-s001.tgz › supplement/compare_with_published.ipynb]

# %% [code]
# RNA modification level estimation with pulseR

# This notebook generates additional figures comparing pulseR estimates
# with those from the supplement of the original LAIC-seq paper:
# Molinie, Benoit, et al. m(6)A-LAIC-seq reveals the census and complexity of the m(6)A epitranscriptome.
# Nature methods 13.8 (2016): 692.

# %% [code]
# Imports

library(pulseR)

library(openxlsx)
library(here)
library(stringr)
library(purrr)
library(data.table)

library(ggplot2)

# %% [code]
# Load published data.
dataURL <- "https://media.nature.com/original/nature-assets/nmeth/journal/v13/n8/extref/nmeth.3898-S2.xlsx"
laicSeqData <- read.xlsx(dataURL)

# %% [code]
# Filter as in the paper.
high.expr.gm <- ((laicSeqData['GM_sp1_sup_pairs'] >= 50) & (laicSeqData['GM_sp2_sup_pairs'] >= 50)) | 
    ((laicSeqData['GM_sp1_elu_pairs']) >= 50 & (laicSeqData['GM_sp2_elu_pairs'] >= 50))
high.expr.h1 <- ((laicSeqData['H1_sp1_sup_pairs'] >= 50) & (laicSeqData['H1_sp2_sup_pairs'] >= 50)) | 
    ((laicSeqData['H1_sp1_elu_pairs']) >= 50 & (laicSeqData['H1_sp2_elu_pairs'] >= 50))

# Split into cells, and add sample average for comparison.
laicSeqDataGM <- laicSeqData[high.expr.gm,]
laicSeqDataGM <- laicSeqDataGM[,c(2,6,7)]
rownames(laicSeqDataGM) <- laicSeqDataGM$Gene_ID
laicSeqDataGM$Gene_ID <- NULL
laicSeqDataGM$mean <- rowMeans(laicSeqDataGM)
laicSeqDataGM$meanPc <- 100*laicSeqDataGM$mean # Add in percentage, this is easier for fitting below.

laicSeqDataH1 <- laicSeqData[high.expr.h1,]
laicSeqDataH1 <- laicSeqDataH1[,c(2,4,5)]
rownames(laicSeqDataH1) <- laicSeqDataH1$Gene_ID
laicSeqDataH1$Gene_ID <- NULL
laicSeqDataH1$mean <- rowMeans(laicSeqDataH1)
laicSeqDataH1$meanPc <- 100*laicSeqDataH1$mean

# %% [code]
# Now load m6A estimates obtained with pulseR (`run-epitranscriptomics-pipeline.R').

path.without <- 'results-without-spike-ins'
path.with <- 'results-with-spike-ins'

# Size for the running median window for bias estimation. 
runmed.window <- 15

cells <- c('GM12878', 'H1-ESC')

# We start with the results without spike-ins, where scaling factors are fitted.

# The results include the genes that are filtered at the expression threshold (counts), as
# specified in the configuration file when runing the pipeline.

fits <- list()
pds <- list()
ciss <- list()
for (cell in cells) {
    fits[[cell]] <- readRDS(file.path(path.without, cell, 'fit.rds'))
    pds[[cell]] <- readRDS(file.path(path.without, cell, 'pd.rds'))
    ciss[[cell]] <- readRDS(file.path(path.without, cell, 'cis.rds'))
}

dfs <- list()
for (cell in cells) {
    # We first need to add fit to counts to have the gene identifiers...
    dfs[[cell]] <- pds[[cell]]$counts
    dfs[[cell]] <- cbind(dfs[[cell]], m=fits[[cell]]$mu)
    dfs[[cell]] <- cbind(dfs[[cell]], y=fits[[cell]]$y)
    # then we add confidence intervals...
    dfs[[cell]] <- cbind(dfs[[cell]], ml=ciss[[cell]]$mu[,1])
    dfs[[cell]] <- cbind(dfs[[cell]], mu=ciss[[cell]]$mu[,2])
    dfs[[cell]] <- cbind(dfs[[cell]], yl=ciss[[cell]]$y[,1])
    dfs[[cell]] <- cbind(dfs[[cell]], yu=ciss[[cell]]$y[,2])
}

# Now we need to "match" the data on the common set of genes.
dfs[['GM12878']] <- merge(dfs[['GM12878']], laicSeqDataGM, by='row.names')
setnames(dfs[['GM12878']], old=c('Row.names', 'GM_sp1_m6A_level', 'GM_sp2_m6A_level'), new=c('gene', 'sp1', 'sp2'))
dfs[['H1-ESC']] <- merge(dfs[['H1-ESC']], laicSeqDataH1, by='row.names')
setnames(dfs[['H1-ESC']], old=c('Row.names', 'H1_sp1_m6A_level', 'H1_sp2_m6A_level'), new=c('gene', 'sp1', 'sp2'))


# %% [code]
# The published data has some missing values, remove these for the comparison.
# This also removes out of bounds estimate of CIs...
for (cell in cells) {
    row.has.na <- apply(dfs[[cell]], 1, function(x){any(is.na(x))})
    dfs[[cell]] <- dfs[[cell]][!row.has.na,]
}


# %% [code]
# functions

or2alpha <- function(or) 100*exp(or) / (1 + exp(or))
lor <- function(a) log(a/(1 - a))

plotCompare <- function(x, y, ...) {
  # fit linear regression, add R2 and p value
  plot(x, y, cex=.5, pch=16, ...)
  abline(fit <- lm(y ~ x, na.action=na.omit), lty=2, col="yellow3", lwd=2)
  abline(0, 1, col="tomato", lwd=2)
  r2 <- summary(fit)$adj.r.squared
  p <- summary(fit)$coefficients[2,4]  
  rp <- vector('expression',2)
  rp[1] <- substitute(expression(italic(R)^2 == MYVALUE), list(MYVALUE = format(r2,dig=3)))[2]
  rp[2] <- substitute(expression(italic(p) == MYOTHERVALUE), list(MYOTHERVALUE = format(p, digits = 3)))[2]  
  legend('bottomright', legend = rp, bty = 'n')  
}
    
plotBias <- function(y, yl, yu, sp, cell, ...) {
    o <- order(y)
    i <- seq_along(y)
    plot(x = i, y = y[o], type = "n",
      xlab = "Rank",
      ylab = "logit(methylated)",
      main = bquote(~.(cell)),   
      cex.lab = 1.2, ylim=c(-5, 5))
    points(x = i, y = lor(sp[o]), cex = .3, col = alpha('tomato', 0.4))
    # add running median with ends constant and large window
    lines(runmed(lor(sp[o]), runmed.window, c("constant")), col = "red")
    lines(x = i, y = yl[o], type = "l", col = "dodgerblue", cex = .2)
    lines(x = i, y = yu[o], type = "l", col = "dodgerblue", cex = .2)
    lines(x = i, y = y[o])
    legend("topleft", legend = c("pulseR", "Published"), col = c("black", "tomato"), lty = 1, bty = 'n')
}

# %% [code]
# Compare methylation levels between pulseR estimates and published data for both cells.

par(mfrow = c(2,2))

for(cell in cells) {
  plotCompare(or2alpha(dfs[[cell]]$y), dfs[[cell]]$meanPc,
    xlab = "pulseR",
    ylab = "Published",
    main = bquote(~m^6 ~A ~level ~("%") ~","  ~.(cell))) 
  # for the log(odds), make sure we remove Inf by replacing them with NA...
  lor.plot <- lor(dfs[[cell]]$mean)
  lor.plot[which(!is.finite(lor.plot))] = NA      
  plotCompare(dfs[[cell]]$y, lor.plot,
    xlab = "pulseR",
    ylab = "Published",
    main = bquote(~"logit(methylated),"  ~.(cell))) 
}
 

# %% [code]
# Show bias in estimation based on ranking.

par(mar = c(5,5,4,2))
cell <- 'GM12878'
plotBias(dfs[[cell]]$y, dfs[[cell]]$yl, dfs[[cell]]$yu, dfs[[cell]]$mean, cell)


# %% [code]

par(mar = c(5,5,4,2))
cell <- 'H1-ESC'
plotBias(dfs[[cell]]$y, dfs[[cell]]$yl, dfs[[cell]]$yu, dfs[[cell]]$mean, cell)


# %% [code]
# Distribution of estimates.

cell <- 'GM12878'
par(mfrow = c(2,1), mar = c(5,5,4,2))

hist(or2alpha(dfs[[cell]]$y), breaks=40,
 las=1,
xlab = bquote(~m^6 ~A ~level ~("%")),
ylab = "Frequency",
main = bquote('pulseR, ' ~.(cell)))
hist(dfs[[cell]]$meanPc, breaks=40,
 las=1,
xlab = bquote(~m^6 ~A ~level ~("%")),
ylab = "Frequency",
main = bquote('Published, ' ~.(cell)))


# %% [code]

cell <- 'H1-ESC'
par(mfrow = c(2,1), mar = c(5,5,4,2))

hist(or2alpha(dfs[[cell]]$y), breaks=40,
 las=1,
xlab = bquote(~m^6 ~A ~level ~("%")),
ylab = "Frequency",
main = bquote('pulseR, ' ~.(cell)))
hist(dfs[[cell]]$meanPc, breaks=40,
 las=1,
xlab = bquote(~m^6 ~A ~level ~("%")),
ylab = "Frequency",
main = bquote('Published, ' ~.(cell)))


# %% [code]
# Now look at the results with ERCC spike-ins, where scaling factors are estimated (not fitted).
fits <- list()
pds <- list()
ciss <- list()
for (cell in cells) {
    fits[[cell]] <- readRDS(file.path(path.with, cell, 'fit.rds'))
    pds[[cell]] <- readRDS(file.path(path.with, cell, 'pd.rds'))
    ciss[[cell]] <- readRDS(file.path(path.with, cell, 'cis.rds'))
}


dfs <- list()
for (cell in cells) {
    dfs[[cell]] <- pds[[cell]]$counts
    dfs[[cell]] <- cbind(dfs[[cell]], m=fits[[cell]]$mu)
    dfs[[cell]] <- cbind(dfs[[cell]], y=fits[[cell]]$y)
    dfs[[cell]] <- cbind(dfs[[cell]], ml=ciss[[cell]]$mu[,1])
    dfs[[cell]] <- cbind(dfs[[cell]], mu=ciss[[cell]]$mu[,2])
    dfs[[cell]] <- cbind(dfs[[cell]], yl=ciss[[cell]]$y[,1])
    dfs[[cell]] <- cbind(dfs[[cell]], yu=ciss[[cell]]$y[,2])
}

for (cell in cells) {
    row.has.na <- apply(dfs[[cell]], 1, function(x){any(is.na(x))})
    dfs[[cell]] <- dfs[[cell]][!row.has.na,]
}

dfs[['GM12878']] <- merge(dfs[['GM12878']], laicSeqDataGM, by='row.names')
setnames(dfs[['GM12878']], old=c('Row.names', 'GM_sp1_m6A_level', 'GM_sp2_m6A_level'), new=c('gene', 'sp1', 'sp2'))
dfs[['H1-ESC']] <- merge(dfs[['H1-ESC']], laicSeqDataH1, by='row.names')
setnames(dfs[['H1-ESC']], old=c('Row.names', 'H1_sp1_m6A_level', 'H1_sp2_m6A_level'), new=c('gene', 'sp1', 'sp2'))

for (cell in cells) {
    row.has.na <- apply(dfs[[cell]], 1, function(x){any(is.na(x))})
    dfs[[cell]] <- dfs[[cell]][!row.has.na,]
}


# %% [code]
# Compare methylation levels between pulseR estimates and published data for both cells.

par(mfrow = c(2,2))

for(cell in cells) {
  plotCompare(or2alpha(dfs[[cell]]$y), dfs[[cell]]$meanPc,
    xlab = "pulseR",
    ylab = "Published",
    main = bquote(~m^6 ~A ~level ~("%") ~","  ~.(cell))) 
  # for the log(odds), make sure we remove Inf by replacing them with NA...
  lor.plot <- lor(dfs[[cell]]$mean)
  lor.plot[which(!is.finite(lor.plot))] = NA      
  plotCompare(dfs[[cell]]$y, lor.plot,
    xlab = "pulseR",
    ylab = "Published",
    main = bquote(~"logit(methylated),"  ~.(cell))) 
}
 

# %% [code]
# Show bias in estimation based on ranking.

par(mar = c(5,5,4,2))
cell <- 'GM12878'
plotBias(dfs[[cell]]$y, dfs[[cell]]$yl, dfs[[cell]]$yu, dfs[[cell]]$mean, cell)

# %% [code]
par(mar = c(5,5,4,2))
cell <- 'H1-ESC'
plotBias(dfs[[cell]]$y, dfs[[cell]]$yl, dfs[[cell]]$yu, dfs[[cell]]$mean, cell)

# %% [code]
# Dsitribution of estimates

cell <- 'GM12878'
par(mfrow = c(2,1), mar = c(5,5,4,2))

hist(or2alpha(dfs[[cell]]$y), breaks=40,
 las=1,
xlab = bquote(~m^6 ~A ~level ~("%")),
ylab = "Frequency",
main = bquote('pulseR, ' ~.(cell)))
hist(dfs[[cell]]$meanPc, breaks=40,
 las=1,
xlab = bquote(~m^6 ~A ~level ~("%")),
ylab = "Frequency",
main = bquote('Published, ' ~.(cell)))

# %% [code]
cell <- 'H1-ESC'
par(mfrow = c(2,1), mar = c(5,5,4,2))

hist(or2alpha(dfs[[cell]]$y), breaks=40,
 las=1,
xlab = bquote(~m^6 ~A ~level ~("%")),
ylab = "Frequency",
main = bquote('pulseR, ' ~.(cell)))
hist(dfs[[cell]]$meanPc, breaks=40,
 las=1,
xlab = bquote(~m^6 ~A ~level ~("%")),
ylab = "Frequency",
main = bquote('Published, ' ~.(cell)))

# %% [code]
