# Supplementary material for: RNA Modification Level Estimation with pulseR
Source: Genes (Basel). 2018 Dec 10;9(12):619. doi: 10.3390/genes9120619 (PMC6316556; doi:10.3390/genes9120619)
Supplement: Supplementary file 1 [file genes-09-00619-s001.tgz › supplement/compare_with_pulseR.ipynb]

# %% [code]
# RNA modification level estimation with pulseR

# This notebook generates the figures in the published manuscript.

# %% [code]
# Imports

library(pulseR)

library(openxlsx)
library(here)
library(stringr)
library(purrr)
library(data.table)

library(ggplot2)
require(gridExtra)

# %% [code]
# Load m6A estimates obtained with the LAIC-seq method.
# Split into cells, and add sample average for comparison.

path <- 'mapping'
m6A <- read.xlsx(file.path(path, 'supplement.xlsx'), sheet='LAIC-seq_level', rowNames=T)

H1_m6A <- m6A[, grep('H', names(m6A))]
GM_m6A <- m6A[, grep('G', names(m6A))]

H1_m6A$mean <- rowMeans(H1_m6A)
H1_m6A$meanPc <- 100*H1_m6A$mean # this is easier to add it now...
GM_m6A$mean <- rowMeans(GM_m6A)
GM_m6A$meanPc <- 100*GM_m6A$mean


# %% [code]
# Now load m6A estimates obtained with pulseR (`run-epitranscriptomics-pipeline.R').

path.without <- 'results-without-spike-ins'
path.with <- 'results-with-spike-ins'

# Size for the running median window for bias estimation. 
runmed.window <- 15

cells <- c('GM12878', 'H1-ESC')

# We start with the results without spike-ins, where scaling factors are fitted.

# The results include the genes that are filtered at the expression threshold (counts), as
# specified in the configuration file when runing the pipeline.

fits <- list()
pds <- list()
ciss <- list()
for (cell in cells) {
    fits[[cell]] <- readRDS(file.path(path.without, cell, 'fit.rds'))
    pds[[cell]] <- readRDS(file.path(path.without, cell, 'pd.rds'))
    ciss[[cell]] <- readRDS(file.path(path.without, cell, 'cis.rds'))
}

dfs <- list()
for (cell in cells) {
    # We first need to add fit to counts to have the gene identifiers...
    dfs[[cell]] <- pds[[cell]]$counts
    dfs[[cell]] <- cbind(dfs[[cell]], m=fits[[cell]]$mu)
    dfs[[cell]] <- cbind(dfs[[cell]], y=fits[[cell]]$y)
    # then we add confidence intervals...
    dfs[[cell]] <- cbind(dfs[[cell]], ml=ciss[[cell]]$mu[,1])
    dfs[[cell]] <- cbind(dfs[[cell]], mu=ciss[[cell]]$mu[,2])
    dfs[[cell]] <- cbind(dfs[[cell]], yl=ciss[[cell]]$y[,1])
    dfs[[cell]] <- cbind(dfs[[cell]], yu=ciss[[cell]]$y[,2])
}


# %% [code]
# Note: out of bounds estimate of CIs are ignored, ideally we should replace these with 
# the specified values for the upper/lower bounds, as for the methylation estimates.
# There are only a few, and some of these genes may not be reliable though...
for (cell in cells) {
    row.has.na <- apply(dfs[[cell]], 1, function(x){any(is.na(x))})
    dfs[[cell]] <- dfs[[cell]][!row.has.na,]
}


# %% [code]
# ... finally we add the `LAIC-seq' estimates, on the common set of genes.
dfs[['GM12878']] <- merge(dfs[['GM12878']], GM_m6A, by='row.names')
setnames(dfs[['GM12878']], old=c('Row.names', 'G1m6A', 'G2m6A'), new=c('gene', 'sp1', 'sp2'))
dfs[['H1-ESC']] <- merge(dfs[['H1-ESC']], H1_m6A, by='row.names')
setnames(dfs[['H1-ESC']], old=c('Row.names', 'H1m6A', 'H2m6A'), new=c('gene', 'sp1', 'sp2'))


# %% [code]
# functions

or2alpha <- function(or) 100*exp(or) / (1 + exp(or))
lor <- function(a) log(a/(1 - a))

plotCompare <- function(x, y, ...) {
  # fit linear regression, add R2 and p value
  plot(x, y, cex=.5, pch=16, ...)
  abline(fit <- lm(y ~ x, na.action=na.omit), lty=2, col="yellow3", lwd=2)
  abline(0, 1, col="tomato", lwd=2)
  r2 <- summary(fit)$adj.r.squared
  p <- summary(fit)$coefficients[2,4]  
  rp <- vector('expression',2)
  rp[1] <- substitute(expression(italic(R)^2 == MYVALUE), list(MYVALUE = format(r2,dig=3)))[2]
  rp[2] <- substitute(expression(italic(p) == MYOTHERVALUE), list(MYOTHERVALUE = format(p, digits = 3)))[2]  
  legend('bottomright', legend = rp, bty = 'n')  
}
    
plotBias <- function(y, yl, yu, sp, cell, ...) {
    o <- order(y)
    i <- seq_along(y)
    plot(x = i, y = y[o], type = "n",
      xlab = "Rank",
      ylab = "logit(methylated)",
      main = bquote(~.(cell)),   
      cex.lab = 1.2, ylim=c(-5, 5))
    points(x = i, y = lor(sp[o]), cex = .3, col = alpha('tomato', 0.4))
    # add running median with ends constant and large window
    lines(runmed(lor(sp[o]), runmed.window, c("constant")), col = "red")
    lines(x = i, y = yl[o], type = "l", col = "dodgerblue", cex = .2)
    lines(x = i, y = yu[o], type = "l", col = "dodgerblue", cex = .2)
    lines(x = i, y = y[o])
    legend("topleft", legend = c("pulseR", "LAIC-seq"), col = c("black", "tomato"), lty = 1, bty = 'n')
}

# %% [code]
# Compare methylation levels between pulseR estimates and `LAIC-seq method' for both cells.

# pdf(file.path('../figures', 'fig2.pdf'))

par(mfrow = c(2,2))

for(cell in cells) {
  plotCompare(or2alpha(dfs[[cell]]$y), dfs[[cell]]$meanPc,
    xlab = "pulseR",
    ylab = "LAIC-seq",
    main = bquote(~m^6 ~A ~level ~("%") ~","  ~.(cell))) 
  # for the log(odds), make sure we remove Inf by replacing them with NA...
  lor.plot <- lor(dfs[[cell]]$mean)
  lor.plot[which(!is.finite(lor.plot))] = NA      
  plotCompare(dfs[[cell]]$y, lor.plot,
    xlab = "pulseR",
    ylab = "LAIC-seq",
    main = bquote(~"logit(methylated),"  ~.(cell))) 
}
 
# dev.off()


# %% [code]
# Show bias in estimation based on ranking.

# pdf(file.path('../figures', 'fig3.pdf'))

par(mar = c(5,5,4,2))
cell <- 'GM12878'
plotBias(dfs[[cell]]$y, dfs[[cell]]$yl, dfs[[cell]]$yu, dfs[[cell]]$mean, cell)

# dev.off()

# %% [code]
# pdf(file.path('../figures', 'fig4.pdf'))

par(mar = c(5,5,4,2))
cell <- 'H1-ESC'
plotBias(dfs[[cell]]$y, dfs[[cell]]$yl, dfs[[cell]]$yu, dfs[[cell]]$mean, cell)

# dev.off()

# %% [code]
# Now with spike-ins
fits <- list()
pds <- list()
ciss <- list()
for (cell in cells) {
    fits[[cell]] <- readRDS(file.path(path.with, cell, 'fit.rds'))
    pds[[cell]] <- readRDS(file.path(path.with, cell, 'pd.rds'))
    ciss[[cell]] <- readRDS(file.path(path.with, cell, 'cis.rds'))
}


dfs <- list()
for (cell in cells) {
    dfs[[cell]] <- pds[[cell]]$counts
    dfs[[cell]] <- cbind(dfs[[cell]], m=fits[[cell]]$mu)
    dfs[[cell]] <- cbind(dfs[[cell]], y=fits[[cell]]$y)
    dfs[[cell]] <- cbind(dfs[[cell]], ml=ciss[[cell]]$mu[,1])
    dfs[[cell]] <- cbind(dfs[[cell]], mu=ciss[[cell]]$mu[,2])
    dfs[[cell]] <- cbind(dfs[[cell]], yl=ciss[[cell]]$y[,1])
    dfs[[cell]] <- cbind(dfs[[cell]], yu=ciss[[cell]]$y[,2])
}

for (cell in cells) {
    row.has.na <- apply(dfs[[cell]], 1, function(x){any(is.na(x))})
    dfs[[cell]] <- dfs[[cell]][!row.has.na,]
}

dfs[['GM12878']] <- merge(dfs[['GM12878']], GM_m6A, by='row.names')
setnames(dfs[['GM12878']], old=c('Row.names', 'G1m6A', 'G2m6A'), new=c('gene', 'sp1', 'sp2'))
dfs[['H1-ESC']] <- merge(dfs[['H1-ESC']], H1_m6A, by='row.names')
setnames(dfs[['H1-ESC']], old=c('Row.names', 'H1m6A', 'H2m6A'), new=c('gene', 'sp1', 'sp2'))


# %% [code]
# Compare methylation levels between pulseR estimates and `LAIC-seq method' for both cells.

# pdf(file.path('../figures', 'fig5.pdf'))

par(mfrow = c(2,2))

for(cell in cells) {
  plotCompare(or2alpha(dfs[[cell]]$y), dfs[[cell]]$meanPc,
    xlab = "pulseR",
    ylab = "LAIC-seq",
    main = bquote(~m^6 ~A ~level ~("%") ~","  ~.(cell))) 
  # for the log(odds), make sure we remove Inf by replacing them with NA...
  lor.plot <- lor(dfs[[cell]]$mean)
  lor.plot[which(!is.finite(lor.plot))] = NA      
  plotCompare(dfs[[cell]]$y, lor.plot,
    xlab = "pulseR",
    ylab = "LAIC-seq",
    main = bquote(~"logit(methylated),"  ~.(cell))) 
}
 
# dev.off()


# %% [code]
# Show bias in estimation based on ranking.

# pdf(file.path('../figures', 'fig6.pdf'))

par(mar = c(5,5,4,2))
cell <- 'GM12878'
plotBias(dfs[[cell]]$y, dfs[[cell]]$yl, dfs[[cell]]$yu, dfs[[cell]]$mean, cell)

# dev.off()

# %% [code]
# pdf(file.path('../figures', 'fig7.pdf'))

par(mar = c(5,5,4,2))
cell <- 'H1-ESC'
plotBias(dfs[[cell]]$y, dfs[[cell]]$yl, dfs[[cell]]$yu, dfs[[cell]]$mean, cell)

# dev.off()
