# Supplementary material for: RNA Modification Level Estimation with pulseR
Source: Genes (Basel). 2018 Dec 10;9(12):619. doi: 10.3390/genes9120619 (PMC6316556; doi:10.3390/genes9120619)
Supplement: Supplementary file 1 [file genes-09-00619-s001.tgz › supplement/H1-ESC.yaml]

cell: H1-ESC
dirlocInput: data
dirlocOutput: results-without-spike-ins
# low expression genes are filtered using the mean abundance either across input or eluate+supernatent
expressionThreshold: 100.0
opts:
  tolerance:
    params: 0.01
    shared: 0.01
    normFactors: 0.01
    logLik: 0.1
  verbose: verbose
  lb:
    size: 0.1
    mu: 3.8 #3.87120101090789
    'y': -10.0
    normFactors:
      total: 0.1
      eluate: 0.1
      supernatent: 0.1
  ub:
    size: 1000000.0
    mu: 14.7 #14.670734495278
    'y': 10.0
    normFactors:
      total: 20.0
      eluate: 20.0
      supernatent: 20.0
  fixedNorms: no
  replicates: 5.0
  cores: 12.0
