# Supplementary material for: RNA Modification Level Estimation with pulseR
Source: Genes (Basel). 2018 Dec 10;9(12):619. doi: 10.3390/genes9120619 (PMC6316556; doi:10.3390/genes9120619)
Supplement: Supplementary file 1 [file genes-09-00619-s001.tgz › supplement/mapping/gene_count_matrix.csv]

	SRR1811007_STARmapping_StringTieBallgown	SRR1811008_STARmapping_StringTieBallgown	SRR1811009_STARmapping_StringTieBallgown	SRR1811010_STARmapping_StringTieBallgown	SRR1811011_STARmapping_StringTieBallgown	SRR1811012_STARmapping_StringTieBallgown	SRR1811013_STARmapping_StringTieBallgown	SRR1811014_STARmapping_StringTieBallgown	SRR1811015_STARmapping_StringTieBallgown	SRR1811016_STARmapping_StringTieBallgown	SRR1811017_STARmapping_StringTieBallgown	SRR1811018_STARmapping_StringTieBallgown
ENSG00000282222	0	0	0	0	0	0	0	0	0	0	0	0
ENSG00000282221	11	0	26	5	4	33	0	0	0	0	0	1
ENSG00000212040	0	0	0	0	0	0	0	0	0	0	0	0
ENSG00000110514	1208	1478	1204	1516	1583	1230	1280	1345	1307	1336	1523	1053
ENSG00000086015	1383	756	3266	1449	1187	2871	757	461	1528	842	677	1244
ENSG00000211769	0	0	0	0	0	0	0	1	0	1	0	0
ENSG00000211768	0	2	0	1	2	0	0	2	2	1	3	2
ENSG00000250337	126	62	143	110	107	109	167	110	238	230	152	235
ENSG00000255071	0	0	0	0	0	0	0	0	4	0	0	0
ENSG00000211767	1	2	1	1	1	1	7	11	3	8	1	3
ENSG00000211766	0	0	1	1	1	1	2	3	1	5	4	1
ENSG00000211765	1	2	1	1	1	1	1	1	1	2	1	0
ENSG00000211764	1	1	1	1	1	1	1	1	1	1	1	1
ENSG00000169740	547	459	621	365	357	539	285	244	681	365	254	574
ENSG00000215869	0	0	0	0	2	0	2	1	8	2	1	2
ENSG00000261609	1264	1240	544	1261	1267	655	178	156	110	199	207	69
ENSG00000169744	834	1213	820	1630	1116	763	0	0	0	0	1	0
ENSG00000261607	0	0	0	0	0	0	0	0	0	0	0	0
ENSG00000261606	6	9	11	4	2	7	8	0	22	4	3	9
ENSG00000215866	1080	1224	971	1630	1268	1412	0	0	0	0	0	0
ENSG00000261604	0	0	0	0	1	1	0	0	0	0	0	0
ENSG00000261603	0	3	0	0	0	5	0	0	0	2	0	0
ENSG00000261602	1	1	1	1	1	0	1	0	1	1	3	0
ENSG00000261600	2	4	2	2	3	2	2	2	2	2	4	1
ENSG00000266469	0	0	4	0	0	6	17	2	54	22	4	53
ENSG00000168298	44	51	6	36	52	6	29	47	41	38	49	34
ENSG00000168297	157	168	53	195	187	64	259	395	184	367	365	130
ENSG00000266460	0	0	0	0	0	0	0	0	0	0	0	0
ENSG00000266461	0	0	0	0	0	0	0	0	0	0	0	0
ENSG00000266466	0	0	0	0	0	0	0	0	0	0	0	0
ENSG00000266467	2	0	0	0	0	0	1	1	1	1	1	1
ENSG00000168291	2545	2301	1996	2024	2410	1989	767	724	757	842	722	582
ENSG00000262558	0	0	0	0	0	0	0	0	0	0	0	0
ENSG00000270591	0	0	0	0	0	0	0	0	0	0	0	0
ENSG00000262554	2	1	1	2	1	1	1	3	1	1	1	1
ENSG00000254141	0	0	0	0	0	0	0	0	0	0	0	0
ENSG00000225108	0	0	1	0	1	0	0	0	0	0	0	0
ENSG00000281042	0	0	0	0	0	0	0	0	0	0	0	0
ENSG00000225100	0	0	0	0	0	0	0	0	0	0	0	0
ENSG00000225101	2	0	2	0	0	2	1	0	1	0	0	0
ENSG00000225102	0	0	0	0	0	0	0	0	0	0	0	0
ENSG00000225105	0	0	0	0	0	0	0	0	0	0	0	0
ENSG00000225106	1	0	0	0	0	0	0	0	0	0	0	0
ENSG00000225107	0	0	0	0	0	0	0	0	0	0	0	0
ENSG00000226457	21	21	10	20	14	2	13	17	23	19	21	10
ENSG00000226455	0	0	0	0	0	0	0	0	0	0	0	0
ENSG00000226454	3	0	0	0	0	0	0	0	0	0	0	0
ENSG00000149792	428	595	236	373	396	238	367	575	347	347	1481	631
ENSG00000226450	0	0	0	0	0	2	6	4	23	11	5	11
ENSG00000141854	20	6	48	24	25	85	13	7	8	8	5	16
ENSG00000149798	451	164	1495	424	181	1812	69	17	202	44	18	139
ENSG00000238419	0	0	0	0	0	0	0	0	0	0	0	0
ENSG00000283571	0	0	0	0	0	0	54	62	40	52	64	48
ENSG00000212153	0	0	0	0	0	0	0	0	0	0	0	0
ENSG00000183055	26	22	36	38	22	44	19	21	31	25	16	22
ENSG00000183054	550	270	1165	503	348	1282	494	158	1460	612	203	1062
ENSG00000283575	0	0	1	1	0	0	0	0	0	1	0	0
ENSG00000283574	1	1	2	1	1	1	2	1	1	1	1	1
ENSG00000283577	0	0	0	0	0	0	0	0	0	0	0	0
ENSG00000283576	0	0	0	0	0	0	0	0	0	0	0	0
ENSG00000283579	0	0	0	0	0	0	0	0	0	0	0	0
ENSG00000283578	1	0	0	1	0	0	1	0	0	0	1	0
ENSG00000251078	0	0	0	0	0	0	0	0	0	0	0	0
ENSG00000221628	0	0	0	0	0	0	0	0	0	0	0	0
ENSG00000250566	0	0	0	0	0	0	0	0	0	0	0	0
ENSG00000259244	0	0	3	0	0	4	3	0	13	6	3	8
ENSG00000250564	2	5	0	2	0	0	0	0	2	0	0	0
ENSG00000250565	167	82	375	162	85	436	177	53	572	181	69	461
ENSG00000250562	0	0	0	0	0	0	252	118	1017	377	140	1074
ENSG00000250563	2	0	3	0	0	0	0	0	3	0	0	0
ENSG00000187961	119	106	68	113	164	90	168	142	160	184	285	146
ENSG00000250561	0	0	0	0	0	0	1	0	0	0	1	0
ENSG00000250568	303	341	36	280	196	37	191	243	74	216	251	46
ENSG00000250569	6	7	10	7	6	6	8	8	22	19	8	17
ENSG00000281591	0	0	0	0	0	0	0	0	0	0	0	0
ENSG00000220685	1	1	17	7	3	18	3	1	14	5	2	12
ENSG00000162843	0	0	0	0	0	0	2	0	0	0	0	0
ENSG00000259247	0	0	0	0	0	0	0	0	0	0	0	0
ENSG00000162849	15	10	32	17	7	38	680	316	1740	729	418	1442
ENSG00000283689	0	0	3	0	0	2	0	0	0	0	0	0
ENSG00000149243	1	4	1	0	4	4	3	9	0	6	3	1
ENSG00000184702	180	196	202	171	234	245	6	2	1	8	5	2
ENSG00000259242	0	0	0	0	0	0	0	0	0	0	0	0
ENSG00000283683	0	0	0	0	0	0	0	1	7	0	0	0
ENSG00000283682	0	0	1	0	0	0	0	0	0	0	0	0
ENSG00000283680	0	0	0	0	0	0	0	0	0	0	0	0
ENSG00000283686	0	0	0	0	0	0	0	0	0	0	0	0
ENSG00000184708	831	689	1066	815	729	1006	1175	922	2107	1271	932	1503
ENSG00000184709	0	1	0	0	0	0	1	3	1	0	4	3
ENSG00000206811	0	0	0	0	0	0	0	0	1	0	0	0
ENSG00000163462	173	141	265	168	180	305	23	4	25	14	12	14
ENSG00000163463	1335	1571	484	1298	1068	402	841	924	219	872	683	239
ENSG00000163464	0	0	0	0	0	0	0	0	0	0	0	0
ENSG00000163466	6162	7706	3422	5922	4232	2861	15116	16839	6872	16639	17626	5726
ENSG00000163467	43	22	11	39	9	10	0	0	0	0	0	0
ENSG00000163468	11346	16622	4574	10476	13539	4767	8183	10223	2765	8958	11018	2511
ENSG00000206813	0	0	0	0	0	0	0	0	0	0	0	0
ENSG00000162599	49	59	40	74	60	31	0	0	0	1	1	0
ENSG00000162598	15	14	0	7	9	0	0	0	0	0	0	0
ENSG00000267731	2	2	0	2	1	1	39	27	30	58	26	22
ENSG00000272386	0	0	2	0	0	2	0	0	0	0	0	0
ENSG00000029364	869	1015	545	1072	1024	600	1319	1203	975	1204	1248	1127
ENSG00000267732	0	0	0	0	0	0	0	0	0	0	0	0
ENSG00000267735	0	0	0	0	0	0	0	0	0	0	0	0
ENSG00000029363	4178	1568	3752	3676	2115	4896	3647	2275	5334	5822	3187	4175
ENSG00000267737	2	0	0	0	0	0	0	0	2	0	0	0
ENSG00000162594	0	0	0	0	0	1	44	22	140	59	23	90
ENSG00000263609	0	0	0	0	0	0	0	0	0	0	0	0
ENSG00000263608	0	0	0	0	0	0	0	0	0	0	0	0
ENSG00000206817	0	0	0	0	0	0	0	0	0	0	0	0
ENSG00000118640	611	643	519	515	669	619	1245	1441	1159	1288	1493	1144
ENSG00000263600	0	0	0	0	0	0	0	0	0	0	0	0
ENSG00000263603	8	9	6	8	3	4	1	3	7	3	0	5
ENSG00000263602	0	0	0	0	0	0	0	0	0	0	0	0
ENSG00000263604	0	0	0	0	0	0	0	0	0	0	0	0
ENSG00000263606	42	47	23	61	53	36	50	29	34	53	35	20
ENSG00000259169	0	0	0	0	0	0	0	0	0	0	0	0
ENSG00000253144	73	90	21	65	58	22	42	46	26	41	49	12
ENSG00000253147	0	0	0	0	0	0	0	0	0	0	0	0
ENSG00000201466	0	0	0	0	0	0	0	0	0	0	0	0
ENSG00000253141	0	0	0	0	0	0	0	0	0	0	0	0
ENSG00000115073	505	737	217	580	907	244	958	1261	421	1330	1736	420
ENSG00000253143	0	0	0	0	0	0	0	0	0	0	0	0
ENSG00000253142	0	0	0	0	0	0	0	0	0	0	0	0
ENSG00000259161	0	0	0	0	0	0	0	0	0	0	0	0
ENSG00000259160	0	0	0	1	0	1	0	0	0	0	0	0
ENSG00000259163	0	0	0	0	0	0	0	0	0	0	0	0
ENSG00000259162	0	0	0	0	0	0	0	0	0	0	0	0
ENSG00000259165	0	0	0	0	0	0	0	0	0	1	0	0
ENSG00000259164	0	0	0	1	0	0	0	0	0	0	0	0
ENSG00000259167	0	0	0	0	0	0	0	0	0	0	0	0
ENSG00000259166	0	0	0	0	0	0	0	0	0	0	0	0
ENSG00000213853	749	716	483	791	804	533	8	7	7	11	12	5
ENSG00000213851	8	9	1	8	8	0	4	4	2	6	6	1
ENSG00000258590	0	0	0	0	3	0	13	4	10	18	2	2
ENSG00000213857	1	0	1	2	0	0	1	1	3	1	0	3
ENSG00000213856	68	95	16	70	92	19	77	90	36	100	105	25
ENSG00000213854	0	0	0	1	0	0	12	5	18	11	7	20
ENSG00000213859	28	52	850	59	91	180	220	27	728	35	49	946
ENSG00000206979	0	0	0	0	1	0	1	0	1	1	0	0
ENSG00000225816	0	0	0	0	0	0	0	0	0	0	0	0
ENSG00000280881	0	0	0	0	0	0	0	0	0	0	0	0
ENSG00000225814	1	1	1	1	0	1	0	0	1	0	0	0
ENSG00000225815	5	0	24	13	0	37	0	0	0	0	0	0
ENSG00000225813	1	1	0	1	0	0	0	0	0	0	0	0
ENSG00000225811	0	0	0	0	0	0	0	0	0	0	0	0
ENSG00000206846	1	0	2	1	1	0	4	3	3	4	1	3
ENSG00000225818	0	0	0	0	0	0	0	0	0	0	0	0
ENSG00000225819	0	0	0	0	0	0	0	0	0	0	0	0
ENSG00000229306	0	0	0	0	0	0	0	0	0	0	0	0
ENSG00000229307	0	0	0	0	0	0	0	0	0	0	0	0
ENSG00000229305	0	0	0	0	0	0	0	0	0	0	0	0
ENSG00000229302	0	0	0	0	0	0	0	0	0	0	0	0
ENSG00000229303	0	0	0	0	0	0	0	0	0	0	0	0
ENSG00000238489	0	0	0	0	0	0	0	0	0	0	0	0
ENSG00000229301	0	0	0	0	0	0	0	0	0	0	0	0
ENSG00000238485	0	0	0	0	0	0	0	0	0	0	0	0
ENSG00000269911	29	13	48	22	13	64	2	0	5	4	2	7
ENSG00000238482	0	0	0	0	0	0	0	0	0	0	0	0
ENSG00000229308	0	0	0	0	0	0	0	0	0	0	0	0
ENSG00000229309	0	0	0	0	0	0	0	0	0	0	0	0
ENSG00000278072	0	0	0	0	0	0	0	0	0	0	0	0
ENSG00000278073	1	0	1	1	1	0	1	1	1	0	1	1
ENSG00000278071	1	1	0	5	2	2	0	0	0	0	0	0
ENSG00000240174	0	0	0	0	0	0	0	0	0	0	0	0
ENSG00000278077	1	1	4	2	2	2	2	3	7	1	4	8
ENSG00000278075	3	0	2	2	0	4	1	0	1	3	1	0
ENSG00000055070	874	1029	826	937	1026	1130	1326	1546	1173	1521	1994	1298
ENSG00000278078	0	0	0	0	1	0	1	1	1	1	0	0
ENSG00000227411	0	0	0	0	0	0	0	0	0	0	0	0
ENSG00000155719	2	3	0	3	0	0	4	14	4	5	7	0
ENSG00000227413	0	0	0	0	0	0	0	0	0	0	0	0
ENSG00000227416	0	0	0	0	0	0	0	0	0	0	0	0
ENSG00000227417	1	0	0	1	0	0	0	1	2	1	1	0
ENSG00000162337	834	927	1145	905	1192	1517	310	231	416	335	375	388
ENSG00000155714	0	0	0	0	0	1	0	0	0	0	0	0
ENSG00000182010	578	400	579	858	637	990	0	0	2	0	0	0
ENSG00000182013	897	856	1250	1011	1020	1474	224	193	477	301	239	556
ENSG00000244748	2	2	0	0	0	0	1	0	0	0	1	0
ENSG00000186704	57	43	129	28	44	89	137	87	261	174	148	189
ENSG00000251779	0	0	0	0	0	0	0	0	0	0	0	0
ENSG00000251774	1	1	1	3	1	0	2	1	2	1	1	1
ENSG00000251775	0	0	0	0	0	0	1	1	0	0	0	0
ENSG00000251776	0	0	0	0	0	0	0	0	0	0	0	0
ENSG00000251770	0	0	0	0	0	0	0	0	0	0	0	0
ENSG00000245293	2	0	3	2	0	2	3	0	1	2	1	1
ENSG00000251773	0	0	0	0	0	0	0	0	0	0	0	0
ENSG00000164659	905	823	933	1218	926	1160	103	72	114	127	75	78
ENSG00000242748	0	0	0	0	0	0	2	1	4	0	1	3
ENSG00000242747	29	42	3	19	39	4	21	33	7	29	47	4
ENSG00000164651	310	179	388	429	272	415	0	0	0	0	0	0
ENSG00000242741	0	0	0	0	0	0	0	0	0	0	0	0
ENSG00000164654	1441	639	3163	983	639	2580	2574	936	5638	2686	1165	6278
ENSG00000114978	3089	3049	466	3528	3045	539	7254	7488	2045	9137	7348	1496
ENSG00000252236	0	1	0	0	0	0	0	0	0	1	0	2
ENSG00000252237	0	0	0	0	0	0	0	0	0	0	0	0
ENSG00000252230	0	0	1	0	0	0	0	1	0	0	1	0
ENSG00000252231	0	0	0	0	0	0	1	0	0	0	0	0
ENSG00000252233	0	0	0	0	0	0	0	0	0	0	0	0
ENSG00000252238	0	0	0	0	0	0	0	0	0	0	0	0
ENSG00000256925	0	0	1	0	0	0	0	0	0	0	0	0
ENSG00000161021	1806	915	4117	1898	1247	4182	1011	507	2576	1196	731	1965
ENSG00000256922	0	0	0	0	0	0	0	0	0	0	0	0
ENSG00000256923	4	5	5	5	1	8	0	0	0	0	0	0
ENSG00000226331	0	0	0	0	0	0	0	0	0	0	0	0
ENSG00000261608	0	0	0	0	0	0	0	0	0	0	0	0
ENSG00000256928	0	0	0	0	0	0	0	0	0	0	0	0
ENSG00000254694	5	2	2	4	3	4	12	6	10	6	7	8
ENSG00000254695	0	0	0	2	0	0	0	0	0	0	0	0
ENSG00000254696	0	0	0	0	0	0	0	0	0	0	0	0
ENSG00000254697	0	0	0	0	0	0	0	0	1	0	0	0
ENSG00000254690	0	0	0	0	0	0	0	0	0	0	0	0
ENSG00000254691	0	0	1	0	0	0	1	0	0	0	0	0
ENSG00000266929	1	0	0	1	0	0	2	0	0	0	0	0
ENSG00000266928	0	0	0	0	0	0	0	0	0	0	0	0
ENSG00000266925	0	1	0	0	0	0	0	0	0	0	0	0
ENSG00000266924	0	0	0	0	0	0	0	0	0	0	0	0
ENSG00000254698	1	0	0	0	0	0	0	0	0	0	0	0
ENSG00000254699	0	0	0	0	0	0	0	0	0	0	0	0
ENSG00000266921	13	0	25	13	0	42	11	0	58	16	0	59
ENSG00000266920	1	0	1	1	0	0	0	0	5	0	1	1
ENSG00000257343	0	0	0	0	0	0	0	0	0	0	0	0
ENSG00000257342	0	0	1	0	0	0	0	0	0	0	0	2
ENSG00000257341	1	1	0	0	0	1	9	1	5	6	2	3
ENSG00000215867	0	0	0	0	0	0	0	0	0	0	1	0
ENSG00000257346	0	0	0	0	0	0	0	0	0	0	0	0
ENSG00000257345	0	0	0	0	0	0	33	16	20	24	24	13
ENSG00000234337	31	34	18	32	21	25	23	22	39	26	23	32
ENSG00000215861	0	0	0	0	0	4	0	0	4	0	0	5
ENSG00000119509	182	146	311	214	143	339	475	274	1196	556	345	901
ENSG00000228949	0	0	0	1	0	2	0	0	0	0	0	0
ENSG00000256699	0	0	0	0	0	0	0	0	0	0	0	0
ENSG00000256694	0	0	0	0	0	0	0	0	0	0	0	0
ENSG00000256695	0	0	0	0	0	0	0	0	0	0	0	0
ENSG00000228943	0	0	0	0	0	0	0	0	0	0	0	0
ENSG00000228941	3	0	0	0	0	0	0	0	7	0	0	0
ENSG00000228940	0	0	0	0	0	0	0	0	0	0	0	0
ENSG00000165309	5	11	7	4	0	1	1	0	0	1	0	0
ENSG00000281863	0	0	0	0	0	0	0	0	0	0	0	0
ENSG00000165304	1644	2021	566	1735	1641	613	1095	1173	579	1323	1125	501
ENSG00000165300	278	81	578	330	160	872	0	0	0	0	0	2
ENSG00000101608	5436	5856	1689	4633	3647	1602	6291	7454	3130	8573	7458	2831
ENSG00000101605	15	6	17	13	5	45	116	44	280	157	104	215
ENSG00000170100	773	29	547	202	298	1655	33	50	567	29	91	86
ENSG00000237026	0	0	0	0	0	0	0	0	0	0	0	0
ENSG00000187900	0	0	0	0	0	0	77	40	45	82	45	15
ENSG00000198791	3968	4504	794	3510	3787	878	1945	2092	882	2556	2447	660
ENSG00000198792	1727	1705	1163	1817	1786	1216	341	316	320	378	436	292
ENSG00000198793	4673	4216	5846	5161	5208	5219	2679	2298	3996	2948	2871	2790
ENSG00000198794	1461	1627	646	1422	1986	227	99	122	52	84	78	44
ENSG00000198795	453	251	889	455	262	830	4	4	2	3	4	5
ENSG00000197779	249	94	528	312	151	782	349	128	1150	510	215	956
ENSG00000198797	7	3	32	11	7	38	0	0	1	0	0	0
ENSG00000231426	0	0	0	0	0	0	0	0	0	0	0	0
ENSG00000198799	1092	786	1325	1238	977	1618	319	224	594	437	305	511
ENSG00000231424	3	0	0	0	2	2	0	0	0	0	0	0
ENSG00000175550	1099	1624	871	1131	1759	1230	1074	1492	1049	1530	2046	930
ENSG00000231422	0	0	0	0	0	2	0	0	0	0	0	0
ENSG00000175556	0	0	0	0	3	0	0	0	0	0	0	0
ENSG00000197771	3469	3746	781	3190	3233	718	2329	2540	858	2770	2791	688
ENSG00000231421	0	0	0	0	0	0	0	0	0	0	0	0
ENSG00000279848	0	1	0	0	0	0	0	0	0	0	0	0
ENSG00000279849	0	0	0	1	0	0	0	0	0	0	1	0
ENSG00000161682	141	82	415	146	157	623	2	6	19	0	4	4
ENSG00000240173	1	0	1	0	1	0	0	0	0	0	0	0
ENSG00000179420	0	0	0	0	0	0	0	1	1	0	0	0
ENSG00000279840	0	0	1	1	0	0	0	0	0	0	0	0
ENSG00000279841	4	1	2	1	2	0	1	1	2	4	2	3
ENSG00000279842	0	0	0	0	0	0	0	0	0	0	0	0
ENSG00000279844	0	0	3	0	1	0	0	0	0	0	0	0
ENSG00000279845	3	3	4	4	1	3	4	0	4	6	1	5
ENSG00000279846	0	0	0	0	0	0	138	49	385	204	88	356
ENSG00000279847	0	0	0	0	0	0	0	0	0	0	0	0
ENSG00000076321	258	189	485	329	205	484	458	282	884	453	287	753
ENSG00000234389	0	0	0	0	0	0	1	1	6	2	1	1
ENSG00000183864	1821	1324	3503	1947	1414	4249	1252	756	2569	1360	989	2280
ENSG00000183862	0	0	0	0	0	0	0	0	0	0	0	0
ENSG00000277402	1	2	2	2	2	2	50	51	62	54	62	52
ENSG00000167680	481	459	999	609	598	1367	0	0	0	0	0	0
ENSG00000124217	219	103	530	212	99	666	182	50	500	206	74	435
ENSG00000124214	5814	4063	10380	4724	4194	10507	3383	2132	8127	4036	2503	7035
ENSG00000124215	17	21	33	22	14	20	2	1	1	3	0	1
ENSG00000124212	1312	1131	1898	1617	1515	2163	0	0	0	0	0	0
ENSG00000167685	666	680	1087	771	428	1324	505	16	55	531	443	845
ENSG00000247595	19	13	18	20	26	20	15	12	20	20	12	18
ENSG00000161970	23108	31518	4967	24414	17521	5201	29942	40369	6229	34461	36530	6001
ENSG00000175073	549	213	1185	651	341	1701	744	254	2503	1010	307	2232
ENSG00000161973	0	0	1	0	0	0	0	2	2	3	0	0
ENSG00000255279	0	0	0	0	0	0	0	0	0	0	0	0
ENSG00000255275	75	0	0	0	37	3	0	0	0	5	8	0
ENSG00000255274	0	0	0	0	0	0	0	0	9	5	3	10
ENSG00000255277	10	3	6	5	4	5	0	0	0	0	0	0
ENSG00000255276	0	0	0	0	0	0	0	0	0	0	0	0
ENSG00000255271	0	0	0	0	0	0	0	0	0	0	0	0
ENSG00000255270	0	0	0	0	0	0	0	0	0	0	0	0
ENSG00000255273	0	0	0	0	0	0	0	0	0	0	0	0
ENSG00000255272	0	0	0	0	0	0	0	0	0	0	0	0
ENSG00000277903	1	0	0	1	0	0	1	1	1	1	1	0
ENSG00000239670	0	0	0	0	0	0	0	0	0	0	0	0
ENSG00000160087	776	738	1166	811	853	1349	559	579	720	700	745	697
ENSG00000036054	717	707	245	659	671	280	497	505	267	660	591	219
ENSG00000104903	2	5	5	4	6	10	29	32	67	54	50	72
ENSG00000228349	0	0	0	0	0	0	0	0	0	0	0	0
ENSG00000223019	0	0	0	0	0	0	0	0	0	0	0	0
ENSG00000002587	60	28	178	73	33	242	21	3	43	23	4	40
ENSG00000002586	933	1306	216	1065	1195	274	2043	2485	485	2189	3257	518
ENSG00000237868	3	2	6	4	4	13	6	2	16	7	6	9
ENSG00000177954	17666	18577	1660	13210	12806	1497	20936	24803	3544	26664	23682	2889
ENSG00000177951	994	646	2360	1052	728	2567	1199	718	2593	1386	861	2401
ENSG00000280059	0	2	0	0	1	0	0	0	0	0	0	0
ENSG00000280058	199	185	170	242	175	208	0	0	0	0	0	0
ENSG00000198242	16516	24050	1524	15171	18631	1820	21621	29098	1534	23978	34995	1432
ENSG00000280056	32	16	36	56	35	39	0	0	0	0	0	0
ENSG00000237862	0	0	0	0	0	0	0	0	0	0	0	0
ENSG00000237863	21	13	25	13	11	17	0	0	0	0	0	0
ENSG00000198246	386	212	952	335	208	867	44	25	99	53	30	90
ENSG00000223012	0	0	0	0	0	0	0	0	0	0	0	0
ENSG00000280051	0	0	0	0	0	0	0	0	0	0	0	0
ENSG00000280050	0	0	0	0	0	0	0	0	0	0	0	0
ENSG00000135917	215	183	594	275	170	539	0	0	0	0	0	0
ENSG00000135916	8245	9028	2335	5294	8900	1847	682	801	104	749	975	83
ENSG00000135914	0	0	0	0	0	0	0	0	8	0	0	5
ENSG00000135913	966	917	284	1083	1105	432	562	873	807	1193	975	584
ENSG00000135912	2636	2250	1602	1798	1769	2207	1007	799	1559	1167	822	1253
ENSG00000092148	3492	2065	5681	3242	2692	6002	2613	1667	6363	3334	2298	5005
ENSG00000240179	0	1	0	0	0	0	0	0	0	0	0	0
ENSG00000034693	420	523	61	363	443	54	627	770	161	701	828	99
ENSG00000135919	2055	2637	430	2189	2425	449	22	23	2	18	16	2
ENSG00000230487	43	14	79	10	24	97	62	74	251	143	99	190
ENSG00000176396	456	128	1198	435	180	1427	90	26	380	121	29	279
ENSG00000230484	0	0	0	0	0	0	0	0	1	1	0	0
ENSG00000176390	788	870	208	865	967	232	903	1077	283	1116	1197	225
ENSG00000230482	0	0	0	0	0	0	0	0	0	0	0	0
ENSG00000230481	0	0	0	0	0	0	0	0	0	0	0	0
ENSG00000176393	1483	2026	356	1324	1927	413	1308	1667	477	1371	1705	400
ENSG00000176399	209	111	332	213	120	365	0	0	0	0	0	0
ENSG00000230489	0	0	0	0	0	0	0	0	0	0	0	0
ENSG00000243900	2	0	0	0	0	1	1	1	0	2	0	0
ENSG00000243902	0	0	0	0	0	2	0	0	0	0	0	0
ENSG00000243903	0	0	0	0	0	0	0	0	0	0	0	0
ENSG00000243904	35	30	2	29	25	2	14	13	3	27	15	1
ENSG00000083635	969	922	836	1046	819	1014	409	419	388	549	505	311
ENSG00000248029	0	0	0	0	0	0	0	0	0	0	0	0
ENSG00000248027	0	3	3	6	4	8	0	1	2	1	0	2
ENSG00000063515	0	0	0	0	0	0	0	0	0	0	0	0
ENSG00000252599	0	0	0	0	0	0	0	0	0	0	0	0
ENSG00000252598	0	0	0	0	0	0	0	0	0	0	0	0
ENSG00000279713	0	0	0	0	0	0	0	0	0	0	0	0
ENSG00000252591	0	0	0	0	0	0	0	0	0	0	0	0
ENSG00000252590	0	0	0	0	0	0	0	0	0	0	0	0
ENSG00000247627	118	82	119	130	36	92	96	37	287	121	50	14
ENSG00000167531	0	0	0	0	0	0	0	0	0	0	0	0
ENSG00000167536	377	357	789	395	376	1011	287	166	750	387	215	830
ENSG00000252594	0	0	0	0	0	0	0	0	0	0	0	0
ENSG00000252597	0	0	0	0	0	0	0	0	0	0	0	0
ENSG00000167535	200	174	272	177	265	308	48	33	99	41	24	58
ENSG00000236472	0	0	0	0	0	0	0	0	0	0	0	0
ENSG00000207649	0	0	0	0	0	0	0	0	0	0	0	0
ENSG00000188886	0	6	2	0	5	3	3	0	2	7	3	4
ENSG00000279716	3	8	6	3	10	12	3	4	16	4	6	9
ENSG00000188883	195	131	485	201	192	568	0	0	0	0	0	0
ENSG00000279717	0	0	0	0	0	0	0	0	0	0	0	0
ENSG00000241506	1593	1611	1651	1176	1011	1261	1219	1142	1791	1459	1125	1341
ENSG00000241505	0	0	0	0	0	0	0	0	0	0	0	0
ENSG00000094796	0	0	0	0	0	0	0	0	0	0	0	0
ENSG00000279719	0	0	0	0	0	0	0	0	0	0	0	0
ENSG00000226453	9	9	5	8	7	3	9	2	2	6	0	0
ENSG00000237289	930	1191	831	978	978	895	0	10	2	0	3	0
ENSG00000239739	0	0	0	0	0	0	0	0	0	0	0	0
ENSG00000237285	12	8	8	12	8	9	3	4	22	6	3	7
ENSG00000237286	0	0	0	0	0	0	0	0	0	0	0	0
ENSG00000237280	2	1	2	1	1	2	2	1	4	1	2	2
ENSG00000237281	0	0	0	1	0	0	6	6	2	3	5	2
ENSG00000237282	0	0	0	0	0	0	0	0	0	0	0	0
ENSG00000237283	0	0	0	0	0	0	0	0	0	0	0	0
ENSG00000272254	0	0	0	0	0	0	0	0	0	0	0	0
ENSG00000272255	6	4	12	4	0	10	3	4	8	3	1	5
ENSG00000206941	1	3	0	2	5	0	4	3	2	4	5	2
ENSG00000272250	0	0	0	1	0	0	0	0	3	0	0	5
ENSG00000206944	0	0	0	0	0	0	0	0	0	0	0	0
ENSG00000206949	0	0	0	0	0	0	0	0	0	0	0	0
ENSG00000206948	1	1	0	0	1	0	1	0	1	1	1	1
ENSG00000272259	0	0	0	0	0	0	37	6	108	41	16	121
ENSG00000101327	14	15	12	9	14	8	0	0	0	0	0	0
ENSG00000271781	1	0	12	3	1	4	16	0	40	9	4	34
ENSG00000271780	7	1	26	9	3	52	19	4	36	8	2	52
ENSG00000271787	0	0	0	0	0	0	3	0	2	1	1	2
ENSG00000200478	0	0	0	0	0	0	0	0	0	0	0	0
ENSG00000271784	4	0	4	3	1	4	1	0	4	0	1	7
ENSG00000200475	0	0	0	0	0	0	0	0	0	0	0	0
ENSG00000049192	56	51	50	56	42	47	137	110	195	167	118	138
ENSG00000271789	9	7	4	17	6	6	9	7	9	13	5	6
ENSG00000274365	0	0	0	0	0	0	0	0	0	0	0	0
ENSG00000200471	0	0	0	0	0	0	0	0	0	0	0	0
ENSG00000274363	2	0	8	0	0	1	2	0	13	3	0	11
ENSG00000200473	0	0	0	0	0	0	0	0	0	0	0	0
ENSG00000200472	0	0	0	0	0	0	0	0	0	0	0	0
ENSG00000101323	0	0	0	0	0	0	0	0	0	0	0	0
ENSG00000237136	4	6	16	4	0	11	0	0	0	0	0	0
ENSG00000177042	41	46	30	18	46	39	85	124	156	142	169	203
ENSG00000237135	0	0	1	1	0	2	3	1	8	6	3	3
ENSG00000177047	0	0	0	0	0	0	0	0	1	0	0	0
ENSG00000129566	359	450	93	418	619	182	1300	1603	870	1606	2063	798
ENSG00000177045	249	157	819	242	185	1227	87	29	205	65	51	245
ENSG00000272789	0	0	1	0	0	0	0	0	0	0	0	0
ENSG00000272787	4	0	5	7	1	5	0	0	0	0	0	0
ENSG00000272784	2	0	5	3	0	7	0	0	0	0	0	0
ENSG00000154252	0	0	2	0	0	4	0	0	0	0	0	0
ENSG00000272783	0	0	0	0	0	0	0	0	0	0	0	0
ENSG00000237138	0	0	0	0	0	0	0	0	0	0	0	0
ENSG00000237139	0	0	0	0	0	0	0	0	0	0	0	0
ENSG00000277550	0	0	0	0	0	0	0	0	0	0	0	0
ENSG00000141232	570	248	1265	716	298	1749	536	208	1564	605	267	1381
ENSG00000277556	0	0	0	0	0	0	0	0	0	0	0	0
ENSG00000172673	0	0	0	0	0	0	0	0	6	0	0	2
ENSG00000277559	1	1	2	0	1	4	0	0	0	0	0	0
ENSG00000172671	301	143	566	281	155	551	325	192	990	420	234	679
ENSG00000274098	0	0	0	0	0	0	1	0	0	0	0	0
ENSG00000274099	4	2	12	6	6	27	1	2	1	1	2	1
ENSG00000279068	3	0	23	6	0	10	0	0	0	0	0	0
ENSG00000223761	0	0	0	0	0	0	0	0	0	0	0	0
ENSG00000223764	0	0	0	0	0	3	1	0	0	0	0	0
ENSG00000223765	0	0	0	0	0	0	0	0	0	0	0	0
ENSG00000279062	0	0	1	0	1	1	1	1	1	1	1	1
ENSG00000274091	1	1	1	1	1	1	1	1	1	1	1	1
ENSG00000223768	83	52	149	83	68	189	24	14	73	26	16	57
ENSG00000279061	0	0	0	0	0	0	0	1	0	0	0	0
ENSG00000236427	0	0	0	0	0	0	0	0	0	0	0	0
ENSG00000236426	0	0	0	0	0	0	0	0	0	0	0	0
ENSG00000236425	0	0	0	0	0	0	0	0	0	0	0	0
ENSG00000279065	0	0	0	0	0	0	0	0	0	2	0	0
ENSG00000136750	8	6	7	6	2	0	0	0	0	0	0	0
ENSG00000270789	0	0	0	0	0	0	1	0	1	0	1	0
ENSG00000136754	1326	1324	470	1213	1034	465	2292	1686	1314	2747	2383	963
ENSG00000136758	4285	4825	2116	4103	4470	2020	3644	3907	3585	4806	4411	2959
ENSG00000270781	0	0	2	0	2	2	2	0	7	3	0	4
ENSG00000270782	0	0	0	0	0	0	0	0	0	0	0	0
ENSG00000232508	1	0	0	0	0	0	0	0	0	0	0	0
ENSG00000232500	0	0	0	0	0	0	0	0	0	0	0	0
ENSG00000232502	0	0	0	0	0	0	0	0	1	0	1	0
ENSG00000232503	0	0	0	0	0	0	0	0	0	0	0	0
ENSG00000232504	0	0	0	0	0	3	3	0	14	0	0	10
ENSG00000232505	0	0	0	0	0	0	0	0	0	0	0	0
ENSG00000249087	9	10	13	12	15	14	23	12	23	26	14	23
ENSG00000116014	0	0	0	0	0	3	7	7	0	8	5	2
ENSG00000116017	1466	1327	1710	1911	1841	2323	1702	980	3095	2196	1528	2835
ENSG00000116016	107	81	79	134	86	126	97	84	101	76	67	52
ENSG00000249082	0	0	0	0	0	0	0	0	0	0	0	0
ENSG00000249081	0	0	0	0	0	0	0	0	0	0	0	0
ENSG00000234034	0	0	0	0	0	0	0	0	0	0	0	0
ENSG00000249089	0	0	0	0	0	0	0	0	0	0	0	0
ENSG00000250567	0	0	0	0	0	0	0	0	0	0	0	0
ENSG00000201707	0	0	0	0	0	0	0	0	0	0	0	0
ENSG00000234033	0	0	0	0	0	0	0	0	0	0	0	0
ENSG00000146676	1725	1138	2137	1897	1315	2529	1612	915	3089	2083	1183	2379
ENSG00000242860	0	1	0	0	0	0	0	0	0	0	0	0
ENSG00000197674	0	0	0	0	0	0	0	0	0	0	0	0
ENSG00000201708	0	0	0	0	0	0	0	0	0	0	0	0
ENSG00000201709	0	0	0	0	0	0	0	0	0	0	0	0
ENSG00000187243	799	811	1045	941	853	1063	0	0	0	2	2	0
ENSG00000201704	0	0	0	0	0	0	0	0	0	0	0	0
ENSG00000120440	0	0	0	0	0	0	0	0	0	0	0	0
ENSG00000201700	2	0	0	2	0	0	0	0	0	0	0	0
ENSG00000201701	0	0	0	0	0	0	0	0	0	0	0	0
ENSG00000249156	0	0	0	0	0	0	1	0	0	0	0	0
ENSG00000250560	0	0	0	0	0	0	0	0	0	0	0	0
ENSG00000231001	1	0	0	0	0	0	0	0	0	0	0	0
ENSG00000180211	316	319	34	257	230	30	459	545	80	419	452	71
ENSG00000271259	0	0	0	1	0	1	0	0	0	0	0	0
ENSG00000187244	996	1158	737	887	1385	899	0	0	0	0	0	0
ENSG00000276208	0	0	0	0	0	0	0	0	0	0	0	0
ENSG00000276206	0	0	0	0	0	0	0	0	0	0	0	0
ENSG00000271257	0	0	0	0	0	0	0	0	0	0	0	0
ENSG00000276204	0	0	0	0	0	0	0	0	0	0	0	0
ENSG00000276203	2	1	1	1	1	1	8	3	7	9	4	4
ENSG00000271250	0	0	0	0	0	0	0	0	0	0	0	0
ENSG00000271253	0	0	0	1	0	1	0	0	0	0	0	0
ENSG00000276200	0	0	0	0	0	0	0	0	0	0	0	0
ENSG00000270124	2	5	5	3	3	1	0	0	0	0	0	0
ENSG00000270127	10	8	14	13	13	19	46	30	83	61	62	54
ENSG00000270120	0	0	2	1	0	0	43	25	118	51	25	92
ENSG00000270123	0	0	0	0	0	0	0	0	0	0	0	0
ENSG00000174099	45	25	73	38	31	63	6	5	14	2	6	10
ENSG00000278338	2	0	3	1	0	4	2	0	0	5	0	4
ENSG00000224233	0	0	0	0	0	0	0	0	0	0	0	0
ENSG00000235199	0	0	0	0	0	0	0	0	0	0	0	0
ENSG00000224235	0	0	0	0	0	0	0	0	0	0	0	0
ENSG00000187969	0	0	0	0	0	0	0	0	0	0	0	0
ENSG00000224237	0	0	0	0	0	0	3	3	5	3	3	2
ENSG00000224236	3	4	3	2	3	1	5	2	11	14	4	6
ENSG00000224239	0	0	0	0	0	0	0	0	0	0	0	0
ENSG00000224238	0	0	0	0	0	0	0	0	0	0	0	0
ENSG00000235190	0	0	0	0	0	0	0	0	0	0	0	0
ENSG00000137404	683	622	760	403	589	557	603	378	671	225	436	643
ENSG00000235196	0	0	1	0	0	2	0	0	0	0	0	0
ENSG00000235197	0	0	0	1	0	0	1	0	0	0	0	0
ENSG00000264655	0	1	0	0	0	0	0	0	2	0	0	0
ENSG00000275576	5	1	6	5	2	4	3	6	3	3	3	1
ENSG00000275572	0	0	0	0	0	0	0	0	0	0	0	0
ENSG00000162840	0	1	0	1	1	1	0	0	1	1	0	0
ENSG00000060138	6706	8242	3896	7093	7259	4167	2868	2828	1812	3933	4278	1756
ENSG00000275578	0	0	0	0	0	0	0	0	0	0	0	0
ENSG00000281593	0	0	0	0	0	0	1	2	1	0	1	1
ENSG00000044012	0	0	0	0	0	0	0	0	0	0	0	0
ENSG00000231857	0	0	0	0	0	0	0	0	0	0	0	0
ENSG00000122254	42	7	137	34	17	142	0	0	0	0	0	0
ENSG00000231855	0	0	0	0	1	0	0	0	0	0	0	0
ENSG00000231852	0	0	1	0	0	2	0	0	2	0	0	0
ENSG00000231851	5	4	2	5	3	0	0	0	0	0	0	0
ENSG00000130751	37	45	29	48	52	60	0	0	0	0	0	4
ENSG00000180818	0	0	0	0	0	0	0	0	0	0	0	0
ENSG00000231859	0	0	1	0	0	0	1	0	0	0	1	0
ENSG00000130755	2	3	1	1	4	0	672	787	742	761	872	974
ENSG00000233437	0	0	0	0	0	0	0	0	0	0	0	0
ENSG00000186115	0	0	0	0	0	0	8	5	11	8	8	7
ENSG00000197670	0	0	0	0	0	0	0	0	0	0	0	0
ENSG00000110756	566	341	734	598	551	769	1032	978	1811	1402	1085	1352
ENSG00000248840	1	3	2	0	0	6	0	0	0	0	0	0
ENSG00000248842	0	0	0	0	0	0	0	0	0	0	0	0
ENSG00000248843	0	0	0	0	0	0	0	0	0	0	0	1
ENSG00000248844	0	0	0	0	0	0	0	0	0	0	0	0
ENSG00000248846	0	0	0	0	0	0	0	0	0	0	0	0
ENSG00000253572	0	0	0	0	0	0	0	0	0	0	0	0
ENSG00000248848	0	0	0	0	0	0	0	0	0	0	0	0
ENSG00000134278	643	161	786	673	315	765	78	52	171	111	77	82
ENSG00000202474	0	1	1	0	1	0	6	2	17	8	6	16
ENSG00000230813	0	0	0	0	0	0	0	0	0	0	0	0
ENSG00000230814	0	0	0	0	0	0	0	0	0	0	0	0
ENSG00000266312	0	0	0	0	0	0	0	0	0	0	0	0
ENSG00000064726	1337	1190	1028	1369	1210	1133	2904	2608	2715	3608	3049	2176
ENSG00000230818	0	0	0	0	0	0	0	0	0	0	0	0
ENSG00000230819	0	0	0	0	0	0	0	0	0	0	0	0
ENSG00000217791	3	2	2	4	2	1	0	0	0	0	0	0
ENSG00000072506	1443	1930	583	1306	1855	776	1743	2163	730	1683	2288	818
ENSG00000283688	0	0	0	0	0	0	0	0	0	0	0	0
ENSG00000072501	6017	4948	9429	6526	5167	10156	8230	6441	14951	9475	7231	13065
ENSG00000134183	1	2	0	2	0	3	11	3	4	7	4	7
ENSG00000069712	0	0	0	0	0	0	0	0	0	0	0	0
ENSG00000270587	0	0	0	0	0	0	0	0	0	0	0	0
ENSG00000134186	695	334	1629	943	419	2128	1141	608	2678	1776	880	2253
ENSG00000134184	256	531	154	279	457	181	622	731	410	698	753	475
ENSG00000227224	0	0	0	0	0	0	0	0	0	0	0	0
ENSG00000262712	3	0	15	7	4	13	12	1	29	17	8	32
ENSG00000262714	8	5	2	4	2	0	36	31	18	55	41	10
ENSG00000248211	0	0	0	0	0	0	0	0	0	0	0	0
ENSG00000259832	0	0	0	0	0	0	0	0	0	0	0	0
ENSG00000248213	0	0	0	0	0	0	0	1	0	1	0	1
ENSG00000037042	361	413	299	359	447	299	572	437	636	640	627	555
ENSG00000260622	0	0	0	0	0	0	0	0	0	0	0	0
ENSG00000260620	0	0	0	0	0	0	0	0	0	0	0	0
ENSG00000260621	0	0	0	0	0	0	0	0	0	0	0	0
ENSG00000260626	0	0	0	0	0	0	0	0	0	0	0	0
ENSG00000078487	30	32	48	21	25	34	133	111	296	149	121	218
ENSG00000260625	0	0	4	2	0	7	7	2	9	3	4	6
ENSG00000248215	0	0	0	0	0	0	0	0	0	0	0	0
ENSG00000260628	22	17	33	19	20	28	0	3	0	0	0	4
ENSG00000260629	0	0	0	0	0	0	0	0	0	0	0	0
ENSG00000042753	1426	2021	503	1328	1953	620	550	762	124	646	986	135
ENSG00000196096	0	0	0	0	0	0	6	2	6	0	0	2
ENSG00000283685	0	0	0	0	0	0	0	0	0	0	0	0
ENSG00000283684	0	0	2	0	0	0	0	0	0	0	0	0
ENSG00000105855	30	28	35	64	49	51	211	141	271	191	120	141
ENSG00000105854	647	460	240	556	426	247	437	384	388	432	393	347
ENSG00000111481	2342	2150	192	1682	2245	293	1156	2760	354	2781	1809	237
ENSG00000105856	858	479	552	826	880	574	420	385	358	513	457	295
ENSG00000105851	0	0	0	0	0	0	196	120	381	179	113	215
ENSG00000079689	0	0	0	0	0	0	0	0	0	0	0	0
ENSG00000105852	0	0	0	0	0	0	2	2	0	0	0	0
ENSG00000142252	276	114	867	239	191	1001	238	184	958	294	185	815
ENSG00000012174	308	286	129	278	264	161	387	415	259	545	461	333
ENSG00000131002	633	421	639	597	467	682	0	0	0	0	0	0
ENSG00000012171	17	15	33	20	20	73	1	1	3	2	1	4
ENSG00000220447	0	0	0	0	0	0	0	0	0	0	0	0
ENSG00000131007	0	0	0	0	0	0	0	0	0	0	0	0
ENSG00000135587	201	281	26	184	242	38	260	251	51	249	319	42
ENSG00000084710	449	447	295	401	486	321	667	300	434	667	709	371
ENSG00000260505	0	0	0	0	0	0	0	0	0	0	0	0
ENSG00000257022	0	0	0	0	0	0	0	0	0	0	0	0
ENSG00000214110	152	238	38	139	231	48	511	964	216	709	906	170
ENSG00000196098	0	0	0	0	0	0	5	6	3	6	5	3
ENSG00000071082	11120	12377	2879	9431	11572	2204	13316	16044	3888	20836	17988	2587
ENSG00000124490	0	3	0	0	4	2	0	0	0	0	0	0
ENSG00000139780	0	0	0	0	0	0	0	0	1	0	0	0
ENSG00000180660	2	0	2	0	1	2	2	0	3	0	0	2
ENSG00000135638	41	61	67	54	43	80	55	31	109	62	61	143
ENSG00000180662	1	1	1	0	0	0	0	1	0	1	1	0
ENSG00000180667	694	44	749	599	512	952	375	229	658	475	247	596
ENSG00000188419	449	294	367	510	386	522	502	352	705	604	404	504
ENSG00000135632	1814	1802	1710	1661	1959	1757	625	723	564	686	764	532
ENSG00000135631	447	241	1164	476	395	1488	3	5	3	0	4	1
ENSG00000135636	563	770	322	593	916	343	0	1	0	0	0	0
ENSG00000135637	41	20	121	30	39	168	61	28	150	76	57	214
ENSG00000210195	167	164	99	160	86	59	1032	838	796	1103	705	444
ENSG00000147155	890	1316	498	660	1167	575	461	1189	932	426	546	391
ENSG00000263445	0	1	0	0	1	0	0	0	0	0	0	0
ENSG00000112539	7	3	5	4	7	10	0	0	0	0	0	0
ENSG00000263443	0	0	0	0	0	0	0	0	0	0	0	0
ENSG00000114503	2461	1174	4345	2261	1442	4384	2454	1719	2177	3159	1944	3172
ENSG00000258629	0	0	0	0	0	0	0	0	0	0	0	0
ENSG00000184992	653	582	596	752	725	704	1808	1462	2315	2273	1845	2038
ENSG00000116670	3011	5109	773	2731	4695	972	412	618	88	455	724	96
ENSG00000259767	2	2	1	1	1	1	8	7	5	14	14	7
ENSG00000224296	0	0	0	0	0	0	0	0	0	0	0	0
ENSG00000115677	10377	10164	10542	10105	10259	10000	9607	9465	6592	10132	10916	6357
ENSG00000259763	0	0	0	0	0	0	0	0	0	0	0	0
ENSG00000259762	0	0	0	0	0	2	0	0	0	2	0	0
ENSG00000259761	0	3	0	0	0	0	17	19	39	17	22	43
ENSG00000259760	0	0	0	0	0	0	0	0	0	0	0	0
ENSG00000259769	0	0	0	0	0	0	0	0	1	0	0	0
ENSG00000259768	118	44	309	141	59	307	258	99	814	304	137	737
ENSG00000261971	27	12	76	27	27	82	206	55	443	235	81	496
ENSG00000250038	0	0	0	0	0	0	0	0	0	0	0	0
ENSG00000258624	0	0	0	0	0	0	0	0	0	0	0	0
ENSG00000261978	0	0	0	0	0	0	0	0	0	0	0	0
ENSG00000258627	0	0	0	0	0	0	0	0	0	0	0	0
ENSG00000116852	1728	1036	1736	1494	1706	2465	977	818	1914	1502	1331	1298
ENSG00000226284	50	59	24	42	27	21	73	92	44	82	64	32
ENSG00000258620	0	0	0	1	1	0	0	0	0	0	0	0
ENSG00000267597	0	0	0	0	0	0	0	0	0	0	0	0
ENSG00000162592	1	0	1	2	0	0	0	0	0	0	0	0
ENSG00000263199	0	0	0	0	0	0	0	0	0	0	0	0
ENSG00000219747	379	391	38	302	230	44	396	443	66	437	644	39
ENSG00000267733	6	3	7	2	2	7	18	14	7	17	9	10
ENSG00000125255	0	0	0	0	1	0	8	9	6	8	6	4
ENSG00000227258	16	9	23	15	11	36	0	0	0	0	0	0
ENSG00000227259	0	0	0	1	1	0	0	0	0	1	0	0
ENSG00000227256	0	0	0	4	0	5	0	0	4	4	0	0
ENSG00000227257	0	0	0	0	0	0	0	0	0	0	0	0
ENSG00000227254	0	0	0	0	0	0	0	0	0	0	0	0
ENSG00000227255	0	0	0	0	0	0	0	0	0	0	0	0
ENSG00000227252	10	2	36	13	8	50	26	3	79	21	3	77
ENSG00000227253	0	0	0	0	0	0	0	0	0	0	0	0
ENSG00000267734	0	0	0	0	0	0	0	0	0	0	0	0
ENSG00000105143	194	184	79	73	154	83	0	0	0	0	0	0
ENSG00000105141	0	0	0	0	0	0	3	1	1	0	2	3
ENSG00000105146	74	105	50	97	80	48	14	10	6	14	22	10
ENSG00000267630	0	0	0	0	0	0	1	0	0	0	1	1
ENSG00000267631	1	3	0	2	1	2	0	0	0	0	0	1
ENSG00000267632	7	8	7	9	13	8	41	39	69	59	55	62
ENSG00000267633	0	0	0	0	0	0	0	0	0	0	0	0
ENSG00000267634	0	0	0	1	0	0	0	0	0	0	0	0
ENSG00000267636	0	0	0	0	0	0	0	0	0	0	0	0
ENSG00000267637	0	0	0	0	0	0	0	0	0	1	1	0
ENSG00000186543	0	0	0	0	0	0	0	0	0	0	0	0
ENSG00000235949	0	0	0	0	0	0	0	0	0	0	0	0
ENSG00000211798	0	0	0	0	0	4	0	0	0	0	0	0
ENSG00000235940	0	0	0	0	0	0	0	0	0	0	0	0
ENSG00000235943	0	0	0	0	0	0	0	0	0	0	0	0
ENSG00000235942	0	0	0	0	0	0	0	0	0	0	0	0
ENSG00000146205	31	35	96	35	48	100	58	17	120	52	22	94
ENSG00000235944	29	25	64	29	23	85	27	7	61	26	14	51
ENSG00000235947	0	0	0	0	0	0	57	19	133	75	27	118
ENSG00000235946	4	4	13	1	4	8	9	2	34	14	3	33
ENSG00000164418	12	19	27	23	15	45	0	0	0	0	0	0
ENSG00000242509	0	0	0	0	0	0	0	0	0	0	0	0
ENSG00000164411	33	30	24	34	18	30	0	0	0	0	0	0
ENSG00000222150	0	0	0	0	0	0	0	0	0	0	0	0
ENSG00000164414	262	217	258	233	179	264	183	209	446	482	167	392
ENSG00000280163	0	0	0	0	0	0	1	3	3	5	3	3
ENSG00000222154	0	0	0	0	0	0	0	0	0	0	0	0
ENSG00000202227	0	0	0	0	0	0	0	0	0	0	0	0
ENSG00000255776	0	0	3	0	0	1	1	0	2	0	0	2
ENSG00000100532	309	93	421	286	133	303	103	61	291	134	57	155
ENSG00000198937	151	213	118	141	222	156	741	936	682	826	1079	841
ENSG00000206818	0	0	0	0	0	0	0	0	0	0	0	0
ENSG00000077454	281	306	337	404	339	342	501	349	331	615	523	292
ENSG00000186265	0	0	0	0	0	0	2247	1342	4617	2875	1480	3651
ENSG00000273419	3	2	15	5	2	20	2	0	7	5	1	4
ENSG00000252362	0	0	0	0	0	0	0	0	0	0	0	0
ENSG00000077458	337	366	91	442	334	78	631	628	398	788	659	257
ENSG00000201465	0	0	0	0	1	0	0	0	0	0	0	0
ENSG00000226285	0	0	0	0	0	0	0	0	0	0	0	0
ENSG00000139292	9	6	6	5	6	9	0	0	0	0	0	0
ENSG00000224541	0	0	0	0	0	0	0	0	0	0	0	0
ENSG00000259168	0	0	0	0	0	0	0	0	0	0	0	0
ENSG00000278448	0	1	4	5	1	5	4	1	9	7	2	2
ENSG00000201467	0	0	0	0	0	0	0	0	0	0	0	0
ENSG00000262953	0	0	1	0	0	0	0	0	0	0	0	0
ENSG00000278447	1	2	1	1	1	0	1	1	1	1	2	1
ENSG00000212658	0	0	0	0	0	0	0	0	1	1	0	0
ENSG00000212659	0	1	0	0	1	0	0	0	0	0	0	0
ENSG00000265908	0	0	0	0	0	0	0	0	0	0	0	0
ENSG00000265905	0	0	0	0	0	0	0	0	0	0	0	0
ENSG00000152056	175	185	44	190	214	61	233	201	97	296	276	91
ENSG00000212657	0	0	0	0	0	0	1	0	0	0	1	0
ENSG00000265902	0	0	0	0	0	0	0	0	0	0	0	0
ENSG00000253140	0	0	0	0	0	0	76	89	118	127	91	136
ENSG00000260367	0	3	3	4	2	3	0	2	4	0	0	4
ENSG00000260366	1	1	2	0	1	1	2	1	1	3	2	1
ENSG00000260364	3	8	6	3	4	3	0	0	0	0	0	0
ENSG00000260362	643	216	2004	637	217	1883	0	0	0	0	0	0
ENSG00000260361	11	13	29	20	9	19	6	6	25	11	13	11
ENSG00000280160	0	2	0	0	1	0	0	0	0	2	4	6
ENSG00000260369	0	2	0	1	0	0	3	2	1	0	2	4
ENSG00000260368	4	1	5	3	2	5	6	5	9	10	6	10
ENSG00000021300	49	244	210	214	180	192	28	31	25	30	25	9
ENSG00000217026	2	1	0	1	2	0	1	1	1	2	3	0
ENSG00000217027	12	11	8	12	11	11	16	22	18	29	20	12
ENSG00000213332	1	1	1	2	1	0	0	1	0	1	1	0
ENSG00000261013	0	0	0	0	0	0	0	0	0	0	0	0
ENSG00000100399	0	2	2	0	6	11	0	0	0	0	0	0
ENSG00000209482	4	8	2	3	4	2	7	10	11	17	12	8
ENSG00000209480	1	2	1	1	1	1	1	1	1	1	5	5
ENSG00000216378	0	0	0	0	0	0	0	0	0	0	0	0
ENSG00000100393	4760	1595	13762	6412	2966	14105	3921	1303	11679	4695	2117	8600
ENSG00000261011	0	0	0	0	0	0	0	0	0	0	0	0
ENSG00000100395	788	303	2136	825	552	3023	1185	587	2885	1275	794	3352
ENSG00000200552	1	0	0	0	1	0	0	0	0	0	0	0
ENSG00000253148	0	0	0	0	0	0	0	0	0	0	0	0
ENSG00000223208	1	1	1	1	1	0	0	1	1	1	0	0
ENSG00000223203	0	0	0	0	0	0	6	3	1	5	2	1
ENSG00000223202	0	0	0	0	0	0	0	0	0	0	0	0
ENSG00000232353	0	0	0	0	0	0	0	0	0	0	0	0
ENSG00000200553	0	0	0	0	0	0	0	0	0	0	0	0
ENSG00000222356	0	0	0	0	0	0	1	0	0	0	0	0
ENSG00000213338	1	0	1	0	0	1	1	0	1	2	1	3
ENSG00000196550	533	367	767	572	363	885	261	168	530	412	217	401
ENSG00000261019	0	0	1	1	2	2	1	0	0	3	1	0
ENSG00000196557	359	202	1026	385	431	1106	0	0	0	0	0	0
ENSG00000264387	0	0	0	0	0	0	0	0	0	0	0	0
ENSG00000282206	0	0	0	0	0	0	0	0	0	0	0	0
ENSG00000264386	0	0	0	0	0	0	0	2	2	1	2	1
ENSG00000197208	3	0	4	1	1	6	1	0	2	3	3	2
ENSG00000239468	0	0	0	1	0	0	0	0	1	0	0	1
ENSG00000239462	0	0	0	0	0	0	0	0	0	1	0	0
ENSG00000151292	1173	923	995	1251	687	1165	721	309	1180	890	381	1010
ENSG00000113141	2153	2094	2479	2128	1695	2339	3035	2685	4044	3419	3063	3426
ENSG00000239464	0	0	0	0	0	0	0	0	0	0	0	0
ENSG00000280164	0	0	0	0	0	0	0	0	0	0	8	0
ENSG00000217686	0	0	0	0	0	0	0	0	0	0	0	0
ENSG00000217684	0	0	0	0	0	0	0	0	0	0	0	0
ENSG00000217680	0	0	0	0	0	0	0	0	0	0	0	0
ENSG00000222359	1	1	1	1	1	0	1	1	1	1	0	1
ENSG00000211947	0	0	0	0	0	0	597	561	416	841	616	332
ENSG00000026652	1096	683	2322	1118	878	2582	144	57	314	127	72	269
ENSG00000205955	0	0	0	0	0	0	0	0	0	0	0	0
ENSG00000177971	1923	851	5495	1536	727	6273	1211	576	4079	1462	659	3951
ENSG00000211945	0	0	0	0	0	0	1030	956	742	1183	1063	749
ENSG00000205959	22	6	45	17	11	40	3	2	24	9	2	38
ENSG00000185158	272	183	274	321	218	253	150	128	303	241	134	239
ENSG00000211681	0	0	0	0	0	0	1	1	1	0	0	0
ENSG00000211682	0	0	0	0	0	0	0	0	0	0	0	0
ENSG00000211683	0	0	0	0	0	0	0	0	6	0	0	0
ENSG00000211684	0	0	0	0	0	0	1	0	0	0	0	0
ENSG00000211685	0	0	0	0	0	0	16	18	10	13	12	9
ENSG00000211687	0	0	0	0	0	0	0	0	0	0	0	0
ENSG00000211688	0	0	0	0	0	0	0	0	0	0	0	0
ENSG00000211689	2	3	2	3	2	0	0	0	0	0	0	0
ENSG00000185155	53	21	62	31	16	70	33	12	67	32	9	54
ENSG00000185156	34	4	168	44	11	248	72	12	283	73	9	327
ENSG00000255042	0	0	0	0	0	0	0	0	0	0	0	0
ENSG00000229565	0	0	0	0	0	0	0	0	0	0	0	0
ENSG00000229562	3	2	2	3	2	2	0	0	2	1	0	0
ENSG00000229563	0	0	0	0	0	0	0	0	0	0	0	0
ENSG00000229560	0	0	0	0	0	0	0	0	0	0	0	0
ENSG00000225192	0	2	0	0	0	0	3	0	3	1	1	1
ENSG00000255040	1	1	0	1	0	0	1	1	2	1	1	1
ENSG00000229568	0	0	0	0	0	0	0	0	0	0	0	0
ENSG00000229569	0	0	0	1	0	0	0	0	0	0	0	0
ENSG00000213260	176	177	75	193	236	70	110	113	90	149	131	66
ENSG00000106635	523	595	718	553	479	762	719	715	822	792	897	748
ENSG00000106636	2806	3064	2470	2529	2918	2382	1600	1734	1336	1795	1771	1099
ENSG00000225190	223	132	635	234	204	780	445	259	1092	463	418	946
ENSG00000280299	0	0	0	0	0	0	0	0	0	0	0	0
ENSG00000280298	0	0	0	0	0	0	0	0	0	0	1	0
ENSG00000106633	68	47	210	80	35	230	0	0	0	0	0	0
ENSG00000280295	0	0	0	0	0	0	0	0	0	0	0	0
ENSG00000213269	0	0	0	0	1	0	0	0	0	0	0	0
ENSG00000280296	0	0	0	1	0	0	0	0	1	0	0	0
ENSG00000106638	464	256	984	468	332	1114	454	289	1323	580	325	1231
ENSG00000225196	0	0	0	0	0	0	0	0	0	0	0	0
ERCC-00054	4	0	6	3	1	2	2	0	6	3	0	2
ENSG00000211538	0	1	0	0	0	0	0	0	0	0	0	0
ERCC-00051	7	1	6	2	5	13	5	2	13	4	3	7
ERCC-00053	15	4	16	12	7	27	9	5	24	12	5	15
ENSG00000211532	0	0	0	0	0	0	0	0	0	0	0	0
ENSG00000255045	0	0	0	0	0	0	2	2	8	3	0	7
ERCC-00059	9	1	6	8	6	7	4	2	5	5	8	11
ERCC-00058	3	0	0	2	1	6	2	2	0	1	1	1
ENSG00000123584	0	0	0	0	0	0	0	0	0	0	0	0
ENSG00000260668	21	28	0	17	28	0	4	7	0	6	5	0
ENSG00000206812	0	0	0	0	0	0	0	0	0	0	0	0
ENSG00000152670	2	2	1	1	1	1	3	1	2	1	0	1
ENSG00000152672	0	0	0	0	0	0	0	0	0	0	0	0
ENSG00000225198	0	0	0	0	0	0	0	0	0	0	0	0
ENSG00000238731	0	0	0	0	1	0	0	0	0	0	0	0
ENSG00000238730	0	0	0	0	0	0	0	0	0	0	0	0
ENSG00000238735	0	1	0	0	0	0	0	1	0	0	0	0
ENSG00000143643	215	244	71	182	179	79	630	624	418	847	631	270
ENSG00000124588	2041	2520	725	1847	2545	829	20	23	24	39	59	18
ENSG00000143641	2670	1832	5262	2788	2425	6197	1576	912	4383	2142	1248	4004
ENSG00000124587	366	420	418	392	628	591	428	380	647	584	604	749
ENSG00000167332	0	0	0	0	0	0	0	0	0	0	0	0
ENSG00000167333	189	98	449	207	146	599	308	159	767	314	186	571
ENSG00000009830	809	757	719	748	711	670	232	249	262	262	222	186
ENSG00000281657	0	0	0	0	0	0	0	0	0	0	0	0
ENSG00000281655	0	0	0	0	0	0	0	0	0	0	0	0
ENSG00000281652	0	0	0	0	0	0	0	0	0	0	0	0
ENSG00000220161	33	24	83	28	21	77	2	0	7	0	0	0
ENSG00000258056	127	37	441	112	64	500	54	17	209	68	18	209
ENSG00000244183	0	1	0	0	0	0	2	1	3	0	1	0
ENSG00000178927	452	136	1570	414	229	1906	1580	484	5325	1888	666	5579
ENSG00000178921	2774	2786	1439	2603	3262	2395	1556	1558	1835	1927	2135	1622
ENSG00000178922	113	116	51	119	103	139	91	84	161	92	93	64
ENSG00000178928	0	0	0	0	0	0	0	0	0	0	0	0
ENSG00000266341	0	0	0	0	0	0	0	0	0	0	0	0
ENSG00000266340	0	0	0	0	0	0	0	0	0	0	0	0
ENSG00000252861	0	0	0	0	0	0	0	0	0	0	0	0
ENSG00000252860	2	1	0	1	1	0	0	0	0	0	0	0
ENSG00000252863	0	0	0	0	0	0	0	0	0	0	0	0
ENSG00000168310	280	274	346	339	251	353	2051	1774	3002	2433	1877	2816
ENSG00000252864	0	0	0	0	0	0	0	0	0	0	0	0
ENSG00000252867	0	0	0	0	0	0	0	0	0	0	0	0
ENSG00000168314	0	0	0	0	0	2	0	0	0	0	0	0
ENSG00000262456	0	0	0	0	0	0	0	0	0	2	0	0
ENSG00000212135	2	1	1	1	2	1	2	2	2	2	2	2
ENSG00000262454	7	2	13	2	2	16	136	67	485	156	101	411
ENSG00000212133	0	0	0	0	0	0	0	0	0	0	0	0
ENSG00000229492	10	5	6	2	3	8	0	0	1	1	0	0
ENSG00000241073	0	0	0	0	0	0	0	0	0	0	0	0
ENSG00000268416	0	0	1	2	0	1	0	0	0	0	0	0
ENSG00000114268	222	233	452	302	338	528	1647	1530	2654	1775	1930	2519
ENSG00000241074	0	0	0	0	0	0	0	0	0	0	0	0
ENSG00000268412	0	0	0	0	0	0	0	0	0	30	0	0
ENSG00000200673	0	0	0	0	0	0	0	0	0	0	0	0
ENSG00000200670	0	0	0	0	0	0	0	0	0	0	0	0
ENSG00000200677	0	0	0	0	0	0	0	0	0	0	0	0
ENSG00000040487	166	53	582	212	80	788	107	51	305	120	65	256
ENSG00000200674	0	1	1	0	0	1	1	0	0	1	2	2
ENSG00000204709	0	0	0	0	0	0	3	1	0	3	0	2
ENSG00000204703	0	0	0	0	0	0	0	0	0	0	0	0
ENSG00000204702	0	0	0	0	0	0	0	0	0	0	0	0
ENSG00000204701	0	0	0	0	0	0	0	0	0	0	0	0
ENSG00000204700	0	0	0	0	0	0	0	0	0	0	0	0
ENSG00000204706	0	0	0	2	0	0	1	1	2	0	0	3
ENSG00000204705	0	0	0	0	0	1	1	0	0	0	0	0
ENSG00000204704	0	0	0	0	0	0	0	0	0	0	0	0
ENSG00000227973	50	55	101	50	32	72	24	9	67	33	14	42
ENSG00000153107	3617	3825	2182	3745	3974	1741	2397	2532	1442	2805	2776	1036
ENSG00000228778	0	0	0	0	0	0	0	0	0	0	0	0
ENSG00000228779	0	0	0	0	0	0	0	0	0	0	0	0
ENSG00000236932	0	0	0	0	0	0	0	0	0	0	0	0
ENSG00000228775	5	0	5	3	2	7	14	3	42	11	4	23
ENSG00000228776	0	0	0	0	0	0	0	0	0	0	0	0
ENSG00000228777	0	0	0	0	0	0	0	0	0	0	0	0
ENSG00000228770	0	0	0	0	0	0	0	0	0	0	0	0
ENSG00000228771	0	0	0	0	0	0	0	0	0	0	0	0
ENSG00000228772	0	0	0	0	0	0	0	0	0	0	0	0
ENSG00000279268	1	0	1	0	1	0	0	1	1	0	0	0
ENSG00000279269	1	1	1	1	0	3	1	1	0	1	2	0
ENSG00000222685	0	0	0	0	0	0	0	0	0	0	1	0
ENSG00000279261	5	3	8	4	0	10	1	1	1	2	1	1
ENSG00000279262	0	0	0	0	0	0	0	0	0	0	0	0
ENSG00000279263	0	0	0	0	0	0	0	0	0	0	0	0
ENSG00000279264	0	0	0	0	0	0	0	0	0	0	0	0
ENSG00000279265	1	4	5	0	5	4	16	18	15	32	25	17
ENSG00000279266	0	0	1	0	0	3	1	0	7	5	0	8
ENSG00000279267	9	6	4	13	10	7	41	36	53	49	38	26
ENSG00000226646	0	1	0	0	0	0	0	0	0	0	1	0
ENSG00000226647	0	0	0	0	0	0	0	0	0	0	0	0
ENSG00000226644	4	6	0	3	5	0	0	0	0	0	0	0
ENSG00000226645	0	1	0	0	0	0	0	0	1	0	0	0
ENSG00000226642	0	0	0	0	0	0	0	0	1	0	0	0
ENSG00000226643	0	0	0	0	0	0	0	0	0	0	0	0
ENSG00000226640	0	0	0	0	0	0	0	0	0	0	0	0
ENSG00000226641	0	0	0	0	0	0	0	0	0	0	0	0
ENSG00000164047	0	0	0	0	0	0	28	35	4	25	32	6
ENSG00000143756	1164	671	1784	1081	669	1923	716	303	1464	838	388	1363
ENSG00000226648	0	0	5	5	0	2	0	0	5	0	0	4
ENSG00000226649	0	0	0	0	0	0	0	0	0	0	0	0
ENSG00000158022	0	0	0	0	0	0	0	0	0	0	0	0
ENSG00000158023	185	121	227	160	84	234	20	16	62	41	21	53
ENSG00000183242	1	1	0	2	0	3	0	0	0	0	0	0
ENSG00000198723	11	12	22	10	14	11	0	0	2	0	0	0
ENSG00000167800	2	0	0	2	0	0	0	0	0	0	0	0
ENSG00000198722	3054	2093	5845	3068	2551	5541	80	45	208	64	60	126
ENSG00000227412	0	0	0	0	0	0	0	0	0	0	0	0
ENSG00000183248	1174	987	2705	1609	897	2863	7	0	6	3	0	7
ENSG00000183249	0	0	0	0	0	0	0	0	0	0	0	0
ENSG00000127774	862	717	778	691	546	774	381	270	445	70	308	412
ENSG00000239926	0	0	0	0	0	0	0	0	0	0	0	0
ENSG00000239924	0	0	0	0	0	0	0	0	1	0	0	0
ENSG00000239923	0	0	1	0	0	0	0	0	0	0	0	0
ENSG00000239922	0	0	0	0	0	0	0	0	0	0	0	0
ENSG00000239921	0	0	0	0	0	0	0	0	0	0	0	0
ENSG00000239920	0	0	0	0	0	0	2	0	8	3	2	5
ENSG00000233924	3	2	6	3	0	1	0	0	2	0	0	2
ENSG00000233927	2331	4025	307	2261	4590	453	2367	2880	472	3927	6371	484
ENSG00000233926	2	0	0	0	0	0	0	0	0	0	1	0
ENSG00000233921	20	23	0	17	9	1	12	17	13	34	22	2
ENSG00000233920	0	0	0	0	0	0	0	0	0	0	0	0
ENSG00000239432	0	0	0	0	0	0	0	0	0	0	0	0
ENSG00000233922	76	25	232	82	35	274	518	161	1853	562	185	1602
ENSG00000173838	12	0	9	8	2	18	0	0	0	0	0	0
ENSG00000233929	5	5	2	2	6	1	0	1	0	2	1	1
ENSG00000122729	3004	3810	496	3253	3925	552	431	593	78	554	671	63
ENSG00000227418	0	0	0	0	0	0	0	0	0	0	0	0
ENSG00000245311	0	0	0	0	0	0	0	0	0	0	0	0
ENSG00000245317	10	6	16	12	3	21	11	12	46	8	11	32
ENSG00000165406	650	504	768	700	599	1173	933	693	1644	996	775	1168
ENSG00000165409	0	0	0	0	0	0	1	0	2	2	1	1
ENSG00000257998	0	0	0	0	0	0	0	0	0	0	0	0
ENSG00000257999	0	0	0	0	0	3	0	0	0	0	0	0
ENSG00000241258	177	121	83	115	93	94	182	93	494	741	104	154
ENSG00000257991	0	0	0	0	0	0	0	0	0	0	0	0
ENSG00000257997	0	0	0	0	0	0	0	0	0	0	0	0
ENSG00000257994	0	0	0	0	0	0	0	0	0	0	0	0
ENSG00000257995	0	0	0	0	0	0	0	0	0	0	0	0
ENSG00000206635	0	1	0	0	0	0	0	0	0	0	0	0
ENSG00000206634	5	4	1	2	0	0	6	6	2	7	8	1
ENSG00000206637	0	0	0	0	0	0	0	0	0	0	0	0
ENSG00000206636	0	0	0	0	0	0	0	0	0	0	0	0
ENSG00000206631	0	0	0	0	0	0	0	0	0	0	0	0
ENSG00000206630	1	1	1	1	1	1	1	1	1	1	2	1
ENSG00000206633	1	0	1	0	1	0	1	4	1	2	5	1
ENSG00000225224	2	3	1	3	2	2	2	2	6	6	2	2
ENSG00000255843	0	0	0	0	0	0	0	0	0	0	0	0
ENSG00000206639	0	0	0	0	0	0	0	0	0	0	0	0
ENSG00000255847	7	6	6	6	10	3	2	0	0	0	3	0
ENSG00000255845	0	0	0	0	0	0	0	0	0	0	0	0
ENSG00000207944	0	0	0	0	1	0	0	0	0	0	0	0
ENSG00000254718	2	4	3	2	3	5	5	3	8	3	2	6
ENSG00000207946	0	0	0	0	0	0	0	0	0	0	0	0
ENSG00000207947	0	0	0	0	0	0	0	0	0	0	0	0
ENSG00000207940	0	0	0	0	1	0	0	1	0	0	0	0
ENSG00000207941	0	0	0	0	0	0	0	0	0	0	0	0
ENSG00000207942	0	0	0	0	0	0	0	0	0	0	0	0
ENSG00000207943	0	0	0	0	0	0	0	0	0	0	0	0
ENSG00000254710	0	0	0	0	0	0	0	0	0	0	0	0
ENSG00000254713	0	0	0	0	0	0	0	0	1	0	0	0
ENSG00000254712	1	0	0	1	1	4	1	0	8	1	0	2
ENSG00000254715	3	1	5	3	1	6	1	1	1	0	1	1
ENSG00000254714	0	0	0	0	0	0	0	0	0	0	0	0
ENSG00000254717	0	0	0	0	0	0	0	0	0	0	0	0
ENSG00000147614	0	0	0	0	0	0	0	0	0	0	2	0
ENSG00000240849	1243	720	917	1268	1270	1092	264	551	441	608	628	369
ENSG00000278135	0	0	1	0	0	1	1	0	0	2	1	1
ENSG00000278134	0	0	0	0	0	0	0	0	1	0	0	0
ENSG00000278133	121	109	58	111	113	44	115	83	108	123	118	78
ENSG00000158683	2	5	0	2	2	1	0	0	0	0	0	1
ENSG00000278131	0	0	0	0	0	0	0	0	0	0	0	0
ENSG00000278130	0	0	0	0	0	0	0	0	0	0	0	0
ENSG00000240842	0	0	0	0	0	0	0	0	0	0	0	0
ENSG00000225222	0	0	0	0	0	0	0	0	0	0	0	0
ENSG00000278139	0	0	0	0	0	0	0	0	0	0	0	0
ENSG00000240847	0	0	0	0	0	0	0	0	0	0	0	0
ENSG00000008056	510	524	365	631	429	317	54	26	27	56	35	17
ENSG00000130518	7	3	33	12	8	24	17	6	27	9	10	21
ENSG00000159374	184	204	106	222	226	132	6	0	6	2	5	2
ENSG00000159377	4280	5810	2005	3684	4769	1997	2943	3771	1770	3051	4725	1363
ENSG00000215864	0	0	0	0	0	0	0	0	0	0	0	0
ENSG00000130511	99	110	118	100	140	177	252	204	548	321	388	591
ENSG00000130513	68	41	97	62	43	152	8	9	17	11	7	15
ENSG00000130517	709	572	674	69	57	248	85	385	897	578	767	1006
ENSG00000234998	0	0	0	0	0	0	0	0	0	0	0	0
ENSG00000164758	154	204	8	154	206	10	175	237	26	208	249	14
ENSG00000164756	1	1	0	1	1	0	0	1	0	1	0	1
ENSG00000164754	8038	8468	5171	7195	8324	4924	5306	6091	4710	6898	6447	3645
ENSG00000164751	862	933	380	303	857	357	496	1309	781	1487	1453	536
ENSG00000155508	675	784	542	1497	1614	340	978	924	648	414	421	471
ENSG00000159082	117	63	154	144	105	169	354	225	566	404	281	452
ENSG00000155506	11182	6783	22935	12126	7570	24773	6611	3436	15576	7520	4452	13549
ENSG00000159086	1090	945	1081	1182	1015	1418	1347	1072	2112	1837	1251	1857
ENSG00000011478	417	485	370	397	497	444	312	263	299	336	317	327
ENSG00000251778	0	0	0	0	0	0	0	1	0	0	0	0
ENSG00000238832	1	1	0	0	0	0	1	0	0	2	1	0
ENSG00000230769	2	0	0	0	1	0	0	3	0	4	3	3
ENSG00000238833	0	0	0	0	0	0	0	0	0	0	0	0
ENSG00000010704	35	24	37	32	26	79	43	68	225	45	74	187
ENSG00000196616	0	0	0	0	0	0	0	0	0	0	0	0
ENSG00000125046	11	4	5	2	0	1	3	0	0	0	0	2
ENSG00000238830	0	0	0	0	0	0	0	0	0	0	0	0
ENSG00000196611	0	0	0	0	0	0	0	0	1	0	0	0
ENSG00000081913	2951	1816	5339	3025	2287	5302	215	162	445	268	178	356
ENSG00000088205	4102	4465	2583	3751	3906	2487	3610	3786	3152	4468	3841	2852
ENSG00000120498	79	80	8	67	75	13	0	0	1	0	0	0
ENSG00000252002	0	0	0	0	0	0	0	0	0	0	0	0
ENSG00000252001	0	0	0	0	0	0	0	0	0	0	0	0
ENSG00000252005	0	0	0	0	0	0	0	0	0	0	0	0
ENSG00000181029	162	291	67	156	63	143	2	146	101	3	2	103
ENSG00000238835	0	0	0	1	2	0	3	0	0	3	0	0
ENSG00000263923	0	0	0	0	0	0	0	0	0	0	0	0
ENSG00000005471	33	63	21	50	48	55	189	191	220	207	167	153
ENSG00000256713	14	13	2	12	5	3	0	0	0	0	0	0
ENSG00000256712	1	2	1	0	2	0	3	1	8	8	5	5
ENSG00000125753	1272	1902	406	1200	1984	531	1563	2221	535	1871	3053	532
ENSG00000256717	0	0	0	0	0	0	0	0	0	0	0	0
ENSG00000256714	0	0	0	0	0	0	0	0	0	0	0	0
ENSG00000037280	239	160	485	247	234	546	0	0	0	0	0	0
ENSG00000254822	0	0	0	0	0	0	0	0	0	0	0	0
ENSG00000160124	1123	1207	343	893	678	329	770	758	553	1107	696	477
ENSG00000243004	444	383	492	543	450	653	18	0	41	16	8	25
ENSG00000243007	14	23	2	12	25	2	11	21	1	10	35	1
ENSG00000235500	2	0	2	4	0	1	1	1	7	2	3	3
ENSG00000243008	4	0	5	4	3	3	0	0	0	0	5	5
ENSG00000203914	2	2	1	1	1	1	2	1	2	0	1	2
ENSG00000203910	0	0	0	0	0	0	0	0	0	0	0	0
ENSG00000251850	0	0	0	0	0	0	0	0	0	0	0	0
ENSG00000231383	0	0	0	0	0	0	0	0	0	0	0	0
ENSG00000277371	0	1	0	0	0	0	0	0	0	0	1	0
ENSG00000231381	0	0	1	0	0	1	0	0	0	0	0	0
ENSG00000277373	1	0	0	2	2	0	0	0	0	0	0	0
ENSG00000277374	0	0	0	0	0	0	0	0	0	0	0	0
ENSG00000231386	0	0	0	0	0	0	0	0	0	0	0	0
ENSG00000231384	0	0	0	0	0	0	0	0	0	0	0	0
ENSG00000274933	0	0	0	0	0	0	0	0	0	0	0	0
ENSG00000274932	0	0	0	0	0	0	0	0	0	0	0	0
ENSG00000231389	95	100	44	138	103	29	17297	16089	5505	20610	17605	4593
ENSG00000236871	3	2	4	3	0	4	49	17	196	93	20	256
ENSG00000274937	2	3	1	0	1	1	0	1	2	1	0	0
ENSG00000233565	0	0	0	1	0	0	1	1	1	0	1	0
ENSG00000274934	0	0	1	1	1	0	0	0	0	0	3	0
ENSG00000176928	721	435	1176	509	315	905	1	1	5	1	1	5
ENSG00000251857	0	0	0	0	0	0	0	0	0	0	0	0
ENSG00000174429	0	0	0	0	0	0	0	0	0	0	0	0
ENSG00000176923	0	0	0	0	0	0	0	0	0	0	0	0
ENSG00000176922	0	0	0	0	0	0	0	0	0	0	0	0
ENSG00000176920	16	9	118	20	14	103	0	0	0	0	0	0
ENSG00000176927	3	1	5	2	4	8	9	4	39	16	4	21
ENSG00000232739	0	0	0	0	0	0	0	1	0	0	0	0
ENSG00000176925	0	0	0	0	0	0	0	0	0	0	0	0
ENSG00000244196	3	2	0	3	3	0	1	1	1	2	2	0
ENSG00000198169	173	67	524	188	100	639	294	35	1158	339	148	901
ENSG00000198168	326	307	147	298	279	160	991	975	810	1244	1081	657
ENSG00000198162	915	712	895	1184	834	1302	1911	1231	3516	2547	1430	3183
ENSG00000198160	325	245	857	934	657	957	880	733	1079	1409	495	1442
ENSG00000171049	0	3	0	2	0	4	0	0	0	0	0	0
ENSG00000175749	0	0	0	0	0	0	0	0	4	0	0	1
ENSG00000231655	0	0	0	0	0	0	0	0	0	0	0	0
ENSG00000231654	0	0	0	0	0	0	0	0	0	0	0	0
ENSG00000175741	123	148	24	138	89	19	136	127	35	155	126	20
ENSG00000171045	104	65	396	118	98	603	110	56	379	137	104	353
ENSG00000231650	1	0	0	0	0	0	0	0	1	0	0	0
ENSG00000231653	0	0	0	0	0	0	0	0	0	0	0	0
ENSG00000175745	0	0	0	0	0	0	0	0	0	0	0	0
ENSG00000179676	0	0	0	0	0	0	0	0	0	0	0	0
ENSG00000179674	0	0	1	1	0	0	11	2	30	6	3	27
ENSG00000262648	0	0	0	0	0	0	2	0	3	2	1	5
ENSG00000147316	634	250	1377	742	412	1617	980	393	2873	1260	516	2166
ENSG00000230381	0	0	0	0	0	0	0	0	0	0	1	0
ENSG00000230383	2273	3329	462	1853	1984	443	2388	3393	468	2974	3578	334
ENSG00000230384	0	0	0	0	0	0	0	0	0	0	0	0
ENSG00000230385	0	0	0	0	0	0	0	0	0	0	0	0
ENSG00000230386	0	0	0	0	0	0	0	0	0	0	0	0
ENSG00000230387	0	0	0	0	0	0	0	0	0	0	0	0
ENSG00000248783	0	0	0	0	0	0	0	0	0	0	0	0
ENSG00000248781	11	10	3	7	6	2	7	5	15	14	3	10
ENSG00000248780	47	22	110	36	23	102	2	0	20	2	1	11
ENSG00000248787	3	0	0	0	0	0	0	0	0	0	0	0
ENSG00000248785	3	4	1	2	3	1	4	3	1	1	3	1
ENSG00000167476	0	0	0	0	0	11	0	0	0	0	0	0
ENSG00000248789	0	0	0	0	0	0	0	0	0	0	0	0
ENSG00000206113	2	0	0	0	2	0	0	0	0	0	0	0
ENSG00000111897	1071	1025	514	1090	945	506	1558	1394	950	1886	1533	768
ENSG00000244158	0	0	0	0	0	0	0	0	0	0	0	0
ENSG00000189238	0	0	2	0	0	3	0	0	0	0	0	0
ENSG00000276428	0	0	0	0	0	0	0	0	0	0	0	0
ENSG00000276427	0	0	0	0	0	0	0	0	0	0	0	0
ENSG00000276426	0	0	0	0	0	0	0	0	0	0	0	0
ENSG00000276422	0	0	0	0	0	0	0	0	0	0	0	1
ENSG00000253879	0	0	0	0	0	0	0	0	0	0	0	0
ENSG00000253878	9	5	29	18	13	29	32	9	99	41	13	102
ENSG00000253871	0	0	0	0	0	0	0	0	0	0	0	0
ENSG00000253870	0	0	0	0	0	0	0	0	0	0	0	0
ENSG00000253873	298	35	1074	383	138	1273	178	16	404	92	56	313
ENSG00000219500	0	0	0	0	0	0	0	0	0	0	0	0
ENSG00000219507	374	516	218	404	479	224	175	249	111	205	302	90
ENSG00000253874	0	0	0	0	0	0	0	0	0	0	0	0
ENSG00000253877	0	0	0	0	0	0	0	0	0	0	0	0
ENSG00000265470	0	0	0	0	0	0	0	0	0	0	0	0
ENSG00000240068	1	0	0	1	0	0	1	1	0	1	1	1
ENSG00000268500	0	0	0	0	0	0	4	0	0	0	0	8
ENSG00000240063	2	0	0	2	0	3	0	0	0	2	2	0
ENSG00000084754	7321	9021	3945	7448	8646	4426	6991	8512	4691	8119	8344	4372
ENSG00000240065	17	39	19	33	46	35	3222	3550	2408	3911	4082	2419
ENSG00000256927	0	0	0	0	0	0	0	0	0	0	0	0
ENSG00000095637	1439	1029	2383	1610	921	2503	54	34	71	36	47	54
ENSG00000265699	0	0	0	0	0	0	0	0	0	0	0	0
ENSG00000249780	1	1	0	0	0	0	0	0	1	0	0	0
ENSG00000265474	0	0	0	0	0	0	0	0	0	0	0	0
ENSG00000249782	0	0	0	0	0	0	0	0	0	0	0	0
ENSG00000249784	59	71	9	37	89	14	60	60	15	100	73	7
ENSG00000249785	0	0	0	0	0	0	0	0	0	0	0	0
ENSG00000034713	1136	1330	185	1034	1508	241	1632	1817	550	1991	1977	448
ENSG00000249787	0	0	0	0	0	0	0	0	0	0	0	0
ENSG00000176219	0	0	0	0	0	0	0	0	0	0	0	0
ENSG00000230528	1	0	0	0	0	0	2	2	0	0	0	0
ENSG00000230529	0	0	0	0	0	0	0	0	0	0	0	0
ENSG00000230524	2	0	16	6	1	25	1	0	0	0	0	0
ENSG00000230525	0	0	0	0	0	0	0	0	0	0	0	0
ENSG00000091513	0	2	0	0	3	2	2	0	13	6	1	6
ENSG00000230520	0	0	0	0	0	0	0	0	0	0	0	0
ENSG00000230521	1	1	4	0	1	12	32	8	103	45	11	100
ENSG00000230522	0	0	0	0	0	0	0	0	0	0	0	0
ENSG00000230523	0	0	0	0	0	0	0	0	0	0	0	0
ENSG00000146047	0	0	0	0	0	0	0	0	0	0	0	0
ENSG00000278907	2	0	6	2	4	8	0	0	1	0	0	0
ENSG00000278905	0	0	0	0	0	0	0	0	0	0	0	0
ENSG00000278902	0	0	0	0	0	0	0	0	0	0	0	0
ENSG00000278903	41	18	29	44	29	42	31	32	9	42	29	22
ENSG00000278900	0	0	0	1	1	0	1	1	2	1	0	1
ENSG00000274150	0	0	0	0	0	0	0	0	0	0	0	0
ENSG00000278908	0	0	0	0	0	0	0	0	0	0	0	0
ENSG00000278909	1	6	0	0	3	0	1	1	0	1	0	1
ENSG00000148225	8	15	15	20	21	19	46	42	55	51	47	41
ENSG00000133136	6	8	1	8	4	1	4	7	2	9	4	1
ENSG00000133135	30	42	16	63	41	27	0	1	0	0	0	0
ENSG00000272420	2	1	5	1	1	2	3	1	2	3	1	6
ENSG00000272426	1	1	1	0	3	0	1	0	0	0	0	0
ENSG00000138303	636	822	293	652	670	303	1150	1405	616	1371	1287	453
ENSG00000222312	0	0	0	0	0	0	0	0	0	0	0	0
ENSG00000222313	0	0	0	0	0	0	0	0	0	0	0	0
ENSG00000222314	1	1	0	1	1	0	0	1	1	1	0	0
ENSG00000138308	0	0	0	0	0	0	0	0	0	0	0	0
ENSG00000133138	68	68	176	122	117	274	155	159	191	217	152	102
ENSG00000144579	236	424	276	103	211	244	684	403	956	999	1295	1279
ENSG00000067840	3979	1315	13286	1925	1864	13200	0	1	0	0	0	3
ENSG00000146592	62	49	43	64	37	46	154	288	392	165	302	309
ENSG00000248259	0	0	0	0	0	0	0	0	0	0	0	0
ENSG00000227012	2	0	0	0	6	0	0	0	0	0	0	0
ENSG00000248254	0	0	0	0	0	0	0	0	0	0	0	0
ENSG00000248257	0	0	0	0	0	0	0	0	0	0	0	0
ENSG00000248256	0	0	0	0	0	0	0	0	0	0	0	0
ENSG00000089177	355	164	878	416	230	1019	215	88	600	231	125	376
ENSG00000172828	26	12	69	12	8	31	45	36	69	61	61	69
ENSG00000249128	0	0	0	0	0	0	0	0	0	0	0	0
ENSG00000254692	0	0	0	0	0	582	0	0	0	0	0	0
ENSG00000141068	297	274	575	350	360	424	1259	977	1392	1335	1602	1259
ENSG00000137309	29633	38346	8031	30963	33909	8819	6146	3383	2406	6563	8174	1387
ENSG00000144681	580	475	952	493	359	758	0	0	0	0	0	0
ENSG00000254693	0	0	0	0	0	0	0	0	0	0	0	0
ENSG00000172824	1	4	3	3	0	4	47	46	211	91	55	191
ENSG00000066468	1692	1537	2931	2118	1968	3157	0	0	0	0	0	0
ENSG00000268995	2	2	1	1	3	1	2	1	1	2	1	1
ENSG00000241333	1	1	0	0	0	0	1	2	0	1	1	1
ENSG00000268997	0	0	0	0	0	0	0	0	0	0	0	0
ENSG00000268991	0	0	0	0	0	1	0	0	0	0	0	0
ENSG00000268992	1	0	0	0	0	0	0	0	1	1	0	1
ENSG00000268993	0	0	1	1	0	0	0	0	1	0	0	1
ENSG00000205174	0	0	0	0	0	0	0	0	0	0	0	0
ENSG00000173193	781	397	1665	1047	580	2279	6699	3090	18286	8470	4229	14164
ENSG00000266923	0	0	0	0	0	0	0	0	0	0	0	0
ENSG00000067596	1746	1434	3212	1785	1721	3124	1541	1262	2619	1657	1469	2113
ENSG00000266922	0	0	0	0	0	0	0	2	3	1	0	2
ENSG00000116604	429	579	196	555	950	206	2268	2789	628	2490	3639	804
ENSG00000070808	2	0	4	3	2	6	0	0	0	2	0	0
ENSG00000252509	0	0	0	0	0	0	0	0	0	0	0	0
ENSG00000223047	0	0	0	0	0	0	0	0	0	0	0	0
ENSG00000223046	0	0	0	0	0	0	0	0	0	0	0	0
ENSG00000223044	0	1	0	1	1	0	0	0	0	2	1	0
ENSG00000223042	0	0	0	0	0	0	0	0	0	0	0	0
ENSG00000279749	0	0	0	0	0	0	0	0	0	0	0	0
ENSG00000279748	1	0	13	1	0	18	83	16	294	83	27	260
ENSG00000274115	0	0	0	0	0	0	0	0	0	0	0	0
ENSG00000274114	16	11	17	28	13	27	26	6	16	35	13	13
ENSG00000279745	0	1	0	0	0	0	1	1	1	2	1	1
ENSG00000279744	7	3	13	10	7	7	30	25	32	35	26	32
ENSG00000274111	1	1	0	0	1	1	0	0	0	1	1	0
ENSG00000279742	3	1	3	2	2	2	1	0	1	2	0	1
ENSG00000279741	6	2	0	2	1	0	10	10	5	16	6	6
ENSG00000080189	601	506	1080	575	665	1308	932	563	2047	1010	651	1936
ENSG00000252505	0	0	0	0	0	0	0	0	0	0	0	0
ENSG00000147885	0	0	0	0	0	0	0	0	0	0	0	0
ENSG00000264999	0	0	0	0	0	0	0	1	1	0	0	1
ENSG00000147889	6	5	0	9	4	3	118	105	71	154	117	84
ENSG00000101935	1159	1293	209	1107	1034	248	469	517	177	500	524	141
ENSG00000101938	571	607	371	572	565	323	5	4	3	8	10	0
ENSG00000130656	0	0	0	0	0	0	0	0	0	0	0	0
ENSG00000130653	4	7	14	0	2	11	15	6	31	33	23	39
ENSG00000223591	32	21	47	26	23	70	0	0	0	0	0	0
ENSG00000241291	0	0	0	0	0	0	0	0	0	0	0	0
ENSG00000259175	0	0	0	0	0	0	0	0	0	0	0	0
ENSG00000113389	3	2	0	3	0	0	3	4	3	6	5	0
ENSG00000223595	0	0	0	0	0	0	0	0	0	0	0	0
ENSG00000223597	0	0	0	0	0	0	0	0	0	0	0	0
ENSG00000180846	0	0	0	0	0	0	0	0	0	0	0	0
ENSG00000223599	6	2	20	8	4	16	4	0	15	6	6	16
ENSG00000223598	0	0	0	0	0	0	0	0	0	0	0	0
ENSG00000067334	1950	540	5471	1973	1031	3046	1790	736	5599	2092	930	4407
ENSG00000113387	4677	6306	1657	4653	4800	2325	8280	10137	4744	11191	11175	4359
ENSG00000113384	2535	1889	2629	2475	1807	2671	1411	1136	1538	1641	1119	1127
ENSG00000207158	0	0	0	0	0	0	0	0	0	0	0	0
ENSG00000099985	0	0	0	0	0	0	8	5	16	5	6	23
ENSG00000099984	0	19	0	7	20	45	0	0	0	0	0	0
ENSG00000235545	8	8	4	9	8	3	4	2	6	4	0	4
ENSG00000235544	0	1	1	0	0	0	0	0	0	0	0	0
ENSG00000235547	0	0	0	0	0	0	0	0	0	0	0	0
ENSG00000235546	1	4	3	3	4	3	1	0	0	1	1	1
ENSG00000076258	54	51	37	64	60	42	92	72	111	112	93	77
ENSG00000212511	0	0	0	0	0	0	0	0	0	0	0	0
ENSG00000235549	0	0	0	0	0	0	0	0	0	0	0	0
ENSG00000235548	1	0	0	0	0	0	0	0	0	0	0	0
ENSG00000212510	0	0	0	0	0	0	0	0	0	0	0	0
ENSG00000234634	0	0	0	0	0	0	0	0	0	0	0	0
ENSG00000234636	7	6	0	11	11	2	4	4	4	0	4	0
ENSG00000234637	0	0	0	0	0	0	0	0	0	0	0	0
ENSG00000234630	0	0	0	0	0	0	0	0	0	0	0	0
ENSG00000234632	0	0	0	0	0	0	0	0	0	0	0	0
ENSG00000255951	0	0	0	0	0	0	0	0	0	0	0	0
ENSG00000180592	243	74	683	284	113	935	5	1	13	6	0	23
ENSG00000228948	0	0	1	0	0	0	0	0	1	0	0	0
ENSG00000061656	8	8	7	8	14	4	56	77	55	58	116	57
ENSG00000180596	14	17	5	12	18	11	41	34	58	51	52	35
ENSG00000073578	1493	1707	859	1578	2379	1342	2281	3025	1337	2691	3768	1160
ENSG00000180884	183	42	515	208	96	578	151	51	481	153	59	338
ENSG00000228945	0	0	0	0	0	0	0	0	0	0	0	0
ENSG00000169203	204	138	376	223	127	244	510	258	886	618	377	710
ENSG00000228944	6	3	6	0	3	3	0	0	0	0	0	0
ENSG00000089009	20032	25903	4548	16186	18918	4560	21258	26682	4127	32220	34563	4450
ENSG00000261348	0	0	0	0	0	0	0	0	0	0	0	0
ENSG00000261349	6	4	18	11	7	21	11	4	40	18	9	39
ENSG00000273464	0	1	1	0	1	0	2	1	9	2	2	6
ENSG00000261347	0	0	0	0	0	0	0	0	0	0	0	0
ENSG00000169208	0	0	0	0	0	0	0	0	0	0	0	0
ENSG00000089006	4170	5416	1031	3726	4271	970	4691	5445	2273	6307	6242	1981
ENSG00000261342	30	10	109	25	16	99	3	2	25	9	2	29
ENSG00000273461	0	0	0	0	0	0	0	0	0	0	0	0
ENSG00000261340	0	0	0	0	0	0	0	0	0	0	0	0
ENSG00000261341	0	0	0	0	0	0	4	0	0	0	4	0
ENSG00000279336	0	0	0	0	0	0	0	0	0	0	0	0
ENSG00000264192	0	0	0	0	0	0	0	0	0	0	0	0
ENSG00000264193	0	0	0	0	0	0	0	0	0	0	0	0
ENSG00000256690	0	0	0	0	0	0	2	0	0	0	2	2
ENSG00000264196	0	0	0	0	0	0	0	0	0	0	0	0
ENSG00000255959	0	0	0	0	0	0	0	0	0	0	0	0
ENSG00000269113	154	85	251	162	116	329	0	0	0	0	0	0
ENSG00000269110	0	0	0	0	0	0	0	2	0	0	0	0
ENSG00000117266	526	1109	743	983	1372	837	57	48	51	31	67	37
ENSG00000117262	777	539	1099	582	391	803	415	268	759	522	311	606
ENSG00000107831	18	24	7	18	22	9	0	0	0	0	2	0
ENSG00000107833	1627	2399	284	1346	2547	297	639	887	122	711	963	151
ENSG00000224060	0	0	0	0	0	0	0	0	0	0	0	0
ENSG00000224061	1	3	1	2	4	1	1	0	2	2	2	1
ENSG00000156509	27	9	73	38	11	79	142	52	603	231	110	435
ENSG00000224063	3	5	6	5	2	1	0	0	0	0	0	0
ENSG00000224064	1	0	1	0	0	0	0	0	0	0	0	0
ENSG00000224065	0	1	0	0	0	0	0	0	0	0	0	0
ENSG00000224066	0	0	0	0	0	0	7	5	10	14	7	6
ENSG00000224067	0	0	0	0	0	0	0	0	0	0	0	0
ENSG00000224069	0	0	0	0	0	0	0	0	0	0	0	0
ENSG00000156500	42	34	26	36	43	32	101	95	96	127	86	68
ENSG00000060303	2	1	0	1	1	0	0	1	1	3	2	1
ENSG00000264444	0	0	0	0	0	0	0	0	0	0	0	0
ENSG00000156504	584	445	419	534	416	353	1140	821	1264	1408	846	838
ENSG00000207157	0	0	0	0	0	0	0	0	0	0	0	0
ENSG00000267182	0	0	0	0	0	0	0	0	0	0	0	0
ENSG00000267180	0	0	0	0	0	0	0	0	0	0	0	0
ENSG00000267187	0	0	0	0	0	0	0	0	0	0	0	0
ENSG00000267184	0	3	0	0	1	0	0	0	0	0	2	0
ENSG00000267185	35	32	11	28	33	6	51	32	38	61	64	32
ENSG00000103642	385	204	723	414	226	883	934	396	2680	1295	520	2367
ENSG00000267188	0	0	0	0	0	0	0	0	0	0	0	0
ENSG00000267189	0	0	0	0	0	0	0	0	0	0	0	0
ENSG00000103647	182	86	425	189	119	518	0	0	3	0	0	0
ENSG00000263872	0	0	0	0	0	0	0	0	0	0	0	0
ENSG00000263873	6	1	5	4	3	4	0	0	0	0	0	0
ENSG00000263870	0	0	0	0	0	0	0	0	0	0	0	0
ENSG00000263874	21	26	26	19	17	33	31	30	37	37	18	26
ENSG00000263878	0	0	0	0	0	0	0	0	0	0	0	0
ENSG00000022556	83	76	203	108	92	247	942	554	2444	1315	875	2562
ENSG00000181074	3	2	2	3	1	5	16	6	33	24	8	29
ENSG00000076928	577	821	435	599	1028	543	2160	2025	2500	2662	3661	2304
ENSG00000181072	3	1	5	7	0	10	0	0	0	0	1	0
ENSG00000076924	960	1544	177	1014	1920	212	727	832	160	931	1478	164
ENSG00000143337	846	471	1415	873	469	1542	1200	595	2525	1417	769	2063
ENSG00000143333	338	122	903	260	167	910	1246	648	4098	1286	802	3803
ENSG00000134020	0	0	0	0	3	0	4	0	4	2	5	3
ENSG00000168152	306	99	140	349	188	207	84	33	249	117	35	175
ENSG00000189241	1963	505	5979	2125	784	8190	986	219	3624	1220	353	3415
ENSG00000134028	0	0	0	0	0	0	0	4	4	6	0	0
ENSG00000111837	17	7	4	6	9	10	2	1	8	9	3	7
ENSG00000111834	13	5	21	8	3	23	5	0	26	11	4	17
ENSG00000111832	656	567	277	1003	843	438	1505	1671	659	1540	1835	663
ENSG00000219619	0	0	0	0	0	0	0	0	0	0	0	0
ENSG00000262693	0	0	0	0	0	0	0	0	3	3	0	4
ENSG00000171903	0	0	0	0	0	0	0	0	0	0	0	0
ENSG00000244203	0	0	0	0	0	0	0	0	0	0	0	0
ENSG00000188596	0	3	0	0	0	3	141	104	204	165	84	93
ENSG00000188599	272	73	522	140	129	116	224	116	469	251	146	353
ENSG00000283675	0	0	0	0	0	0	0	0	0	0	0	0
ENSG00000176742	0	0	0	0	0	0	0	0	0	0	0	0
ENSG00000238632	0	0	0	0	0	0	0	0	0	0	0	0
ENSG00000272248	0	0	0	1	0	0	0	0	1	0	0	0
ENSG00000121335	0	0	2	0	0	0	0	0	0	0	0	0
ENSG00000237230	0	0	0	0	0	0	0	0	0	0	0	0
ENSG00000269800	6	7	4	7	5	6	17	9	39	19	5	46
ENSG00000269802	0	0	0	0	0	0	0	0	0	0	0	0
ENSG00000237233	0	0	7	0	2	16	0	0	0	0	0	0
ENSG00000269807	0	0	0	0	0	0	1	0	0	0	0	0
ENSG00000269806	0	1	1	0	0	0	0	0	0	0	0	0
ENSG00000265319	0	0	0	0	0	0	0	0	0	0	0	0
ENSG00000167914	0	0	0	0	0	0	0	2	0	0	0	0
ENSG00000237232	0	0	0	0	0	2	0	0	0	0	0	0
ENSG00000265313	0	0	0	0	0	0	0	0	0	0	0	0
ENSG00000265315	0	0	1	0	1	0	1	1	1	1	1	0
ENSG00000265316	0	0	0	0	0	0	0	0	0	0	0	0
ENSG00000263257	0	0	0	0	0	0	0	0	0	0	0	0
ENSG00000263252	0	0	0	0	0	0	0	0	0	0	0	0
ENSG00000263253	0	0	2	0	0	0	0	0	0	0	0	0
ENSG00000207156	0	0	0	0	0	0	0	0	0	0	0	0
ENSG00000251125	0	0	0	0	0	0	0	0	0	0	0	0
ENSG00000251127	0	0	0	0	0	0	0	0	0	0	0	0
ENSG00000251126	0	0	0	0	0	0	0	0	0	0	0	0
ENSG00000215367	0	0	0	0	0	0	0	0	0	0	0	0
ENSG00000167912	124	87	168	110	93	245	41	30	98	57	34	80
ENSG00000215365	0	0	0	0	0	0	0	0	0	0	0	0
ENSG00000251122	0	0	0	0	1	0	0	0	0	0	1	0
ENSG00000215369	0	0	0	0	0	1	3	0	1	0	0	2
ENSG00000215368	0	0	0	0	0	0	0	0	0	0	0	0
ENSG00000251129	5	2	0	8	0	0	0	0	0	0	0	0
ENSG00000251128	0	0	0	0	0	0	0	0	0	0	0	0
ENSG00000119760	766	695	1178	833	526	1225	1017	614	2357	1197	690	2095
ENSG00000259352	0	0	0	0	0	1	0	0	0	0	0	0
ENSG00000259353	0	0	0	0	0	3	0	0	0	0	0	0
ENSG00000259350	0	0	0	0	0	0	0	0	0	0	0	0
ENSG00000259351	0	0	0	0	0	0	0	0	0	0	0	0
ENSG00000259356	0	0	1	0	0	0	0	0	0	0	0	0
ENSG00000198796	14	4	58	17	9	37	657	229	2229	716	279	1827
ENSG00000259354	0	0	0	0	0	0	1	0	0	1	0	0
ENSG00000019991	0	3	0	0	0	0	56	72	57	59	54	20
ENSG00000259358	18	11	15	28	19	24	7	7	16	9	3	9
ENSG00000259359	0	0	0	0	0	0	0	0	0	0	0	0
ENSG00000240197	0	0	0	0	0	0	0	0	0	0	0	0
ENSG00000198798	1	1	2	0	3	2	0	0	0	0	0	1
ENSG00000240194	0	0	0	0	0	0	0	0	0	0	0	0
ENSG00000147059	71	61	346	58	58	144	26	13	64	31	14	58
ENSG00000135778	1241	1321	704	1191	1303	764	777	785	485	1036	872	376
ENSG00000135776	247	239	159	233	305	132	706	666	689	901	736	585
ENSG00000135775	1244	1464	712	1156	1183	671	951	1027	650	1075	1037	543
ENSG00000139428	555	460	687	574	450	753	388	337	395	421	542	306
ENSG00000135773	8	8	7	6	11	0	0	0	0	2	0	0
ENSG00000147050	2421	1595	3578	2694	1716	3083	1241	711	1995	1375	852	1320
ENSG00000152990	2767	1260	6459	2299	1366	5254	232	130	747	255	150	442
ENSG00000197774	64	16	211	50	31	32	77	46	1742	487	141	1352
ENSG00000132749	867	589	1537	960	746	1723	10	15	45	16	14	31
ENSG00000226339	0	0	0	0	0	0	0	1	0	0	0	0
ENSG00000226336	0	0	0	0	0	0	0	0	0	0	0	0
ENSG00000132746	0	0	0	0	0	3	0	0	0	0	0	0
ENSG00000165644	105	119	78	85	136	141	46	51	106	84	75	133
ENSG00000132744	0	2	0	3	0	0	28	44	16	42	44	19
ENSG00000226332	0	3	12	5	3	13	0	0	0	0	0	2
ENSG00000165643	0	0	0	0	0	0	0	0	0	0	0	0
ENSG00000226330	0	0	0	0	0	0	0	0	0	0	0	0
ENSG00000132740	222	127	609	216	214	558	273	191	668	349	281	585
ENSG00000266758	0	0	1	0	1	0	0	1	0	0	0	1
ENSG00000149021	0	0	0	0	0	0	0	0	0	0	0	0
ENSG00000153029	4	3	3	4	4	11	895	300	1572	948	529	1240
ENSG00000231420	0	0	0	0	0	0	0	0	0	0	0	0
ENSG00000165623	45	75	15	33	40	11	0	0	0	0	0	0
ENSG00000245156	0	0	0	0	0	0	0	0	2	0	0	0
ENSG00000266750	0	0	1	0	1	1	1	0	2	1	1	1
ENSG00000266751	0	0	0	0	0	0	0	0	0	0	1	0
ENSG00000266754	0	0	0	0	0	0	0	0	0	0	0	0
ENSG00000266756	0	0	0	0	0	0	0	0	0	0	0	0
ENSG00000249754	0	0	0	0	0	0	0	0	0	0	0	0
ENSG00000187026	0	0	0	0	0	0	0	0	0	0	0	0
ENSG00000187024	33	18	43	22	34	63	47	24	42	26	63	44
ENSG00000142039	576	537	1135	694	610	1358	858	547	1786	962	680	1716
ENSG00000187021	0	0	0	0	0	0	0	0	0	0	0	0
ENSG00000162148	15	23	22	19	19	10	37	31	27	23	15	21
ENSG00000188629	53	0	109	19	4	61	0	0	11	0	0	3
ENSG00000180035	196	5	931	212	39	1612	50	1	221	62	1	217
ENSG00000188624	9	7	6	0	4	12	0	0	0	0	0	0
ENSG00000188626	1	2	3	5	3	5	2	2	5	2	2	3
ENSG00000162144	219	143	236	201	240	197	888	1048	255	862	1157	234
ENSG00000188620	0	0	0	0	0	2	43	24	114	61	52	135
ENSG00000281889	0	0	0	0	0	0	0	0	0	0	0	0
ENSG00000161681	10	13	23	15	19	55	0	0	0	0	0	0
ENSG00000185774	0	0	1	0	0	0	0	0	0	0	0	0
ENSG00000185775	2	2	0	2	0	6	0	0	0	0	0	0
ENSG00000090054	1517	1740	819	1509	1621	798	965	1114	797	1263	1153	804
ENSG00000101096	93	49	149	131	70	188	135	101	273	139	116	151
ENSG00000213177	2	1	0	0	1	0	0	0	0	1	0	0
ENSG00000101098	1453	1819	906	1491	2110	1163	0	0	0	0	2	0
ENSG00000250654	0	0	6	0	0	6	17	10	36	14	7	37
ENSG00000213401	0	0	0	0	0	0	0	0	0	0	0	0
ENSG00000213402	0	0	0	0	0	65	593	0	1741	834	773	1557
ENSG00000213403	0	0	0	0	0	0	0	0	0	0	0	0
ENSG00000250650	0	0	0	0	0	0	0	0	0	0	0	0
ENSG00000250651	0	0	0	0	0	0	4	0	2	1	2	0
ENSG00000257604	0	0	0	0	0	0	0	0	0	0	0	0
ENSG00000257605	5	5	0	0	0	0	3	7	2	4	4	0
ENSG00000213409	2	0	1	2	2	0	1	0	1	0	1	0
ENSG00000112715	560	307	1877	620	376	1376	1051	431	4837	1115	611	4002
ENSG00000250658	0	2	5	0	0	0	0	0	0	0	0	0
ENSG00000250659	0	0	0	0	0	0	0	0	0	0	0	0
ENSG00000258401	1	0	0	0	0	0	0	0	0	0	0	0
ENSG00000258400	0	0	0	0	0	0	0	0	0	0	0	0
ENSG00000147003	69	63	31	85	33	44	11	3	0	9	9	6
ENSG00000258405	19	4	85	47	28	130	4	3	9	5	1	7
ENSG00000258404	0	0	0	0	0	0	0	0	0	0	0	0
ENSG00000258407	0	0	0	0	0	0	0	0	0	0	0	0
ENSG00000258406	0	0	0	0	0	0	0	0	0	0	0	0
ENSG00000185304	327	0	778	0	144	870	0	2	365	0	0	261
ENSG00000258408	0	0	2	1	0	2	0	0	0	0	0	0
ENSG00000179428	3	0	16	2	1	10	1	0	0	0	0	0
ENSG00000235036	75	62	108	50	23	90	72	53	195	102	51	124
ENSG00000090581	210	296	87	221	370	105	272	302	160	374	464	183
ENSG00000229913	0	0	0	0	0	0	0	0	0	0	0	0
ENSG00000138468	213	245	110	254	222	171	596	552	475	703	568	340
ENSG00000250389	0	0	0	0	0	0	0	0	0	0	0	0
ENSG00000250386	0	0	0	0	0	0	0	0	0	0	0	0
ENSG00000250387	0	1	0	0	0	0	0	0	0	0	0	0
ENSG00000164597	905	985	308	1037	1007	279	953	1027	447	1264	1090	373
ENSG00000239014	1	1	1	1	1	1	1	1	1	1	1	1
ENSG00000164591	156	127	333	241	18	1232	2	0	0	3	0	4
ENSG00000250383	0	0	0	0	0	0	0	0	0	0	0	0
ENSG00000222051	0	0	0	1	0	0	0	0	0	0	0	1
ENSG00000148143	2241	1362	7681	3764	1818	7586	205	77	528	148	84	325
ENSG00000267407	0	0	0	0	0	0	0	0	0	0	0	0
ENSG00000267406	0	0	0	0	0	1	0	0	0	0	0	0
ENSG00000267405	2	0	7	0	4	6	0	0	0	0	1	3
ENSG00000267404	0	2	0	0	3	0	0	0	0	0	0	0
ENSG00000267402	0	0	0	0	0	0	0	0	0	0	0	0
ENSG00000267401	0	0	0	0	0	0	0	0	0	0	0	0
ENSG00000267400	0	0	0	0	0	0	0	0	0	0	0	0
ENSG00000104112	2199	2262	1672	2737	2337	2067	0	0	0	0	0	0
ENSG00000267409	0	0	0	0	0	0	0	0	0	0	0	0
ENSG00000267408	0	0	0	0	0	0	0	0	0	0	0	0
ENSG00000223908	6	3	14	6	3	9	3	1	8	4	1	7
ENSG00000223903	0	0	0	0	0	0	0	0	0	0	0	0
ENSG00000223901	0	0	0	0	0	0	1	0	0	0	0	0
ENSG00000011677	387	399	397	402	284	320	1	1	0	0	0	1
ENSG00000223904	0	0	0	0	0	0	0	0	0	0	0	0
ENSG00000223905	0	0	0	0	0	0	0	0	0	0	0	0
ENSG00000158691	304	84	920	344	109	1144	425	93	1737	546	138	1474
ENSG00000218208	149	175	13	140	169	11	95	97	46	153	153	23
ENSG00000125285	53	17	87	93	40	198	0	0	0	0	0	0
ENSG00000242318	0	0	2	0	0	0	2	0	0	0	0	0
ENSG00000181852	1613	1346	1973	1675	1421	1979	691	592	713	817	609	961
ENSG00000242317	0	0	0	0	0	0	0	0	0	0	0	0
ENSG00000242314	1	2	0	2	1	0	1	1	2	1	2	1
ENSG00000181856	135	144	172	119	156	208	0	3	0	3	3	4
ENSG00000155070	0	0	0	0	0	0	0	0	0	0	0	0
ENSG00000168930	0	0	0	0	0	0	0	0	0	0	0	0
ENSG00000168936	281	284	680	322	510	1254	192	181	392	259	226	408
ENSG00000168939	194	88	351	265	152	488	21	10	29	20	18	30
ENSG00000168938	269	330	89	241	347	103	0	2	0	1	0	0
ENSG00000197506	0	0	0	1	0	0	8	12	47	21	10	37
ENSG00000256551	0	0	0	0	0	0	0	0	0	0	0	0
ENSG00000186086	0	0	0	0	0	0	0	0	0	0	0	0
ENSG00000256553	0	0	0	0	0	0	0	0	0	0	0	0
ENSG00000256552	6	2	19	3	1	11	1	0	0	0	0	1
ENSG00000186082	2	0	0	1	0	0	0	0	0	0	0	0
ENSG00000186081	0	0	0	0	0	0	2	1	0	0	2	0
ENSG00000126882	105	45	342	114	71	378	934	348	2715	1138	658	2403
ENSG00000186088	4	8	2	7	5	5	372	407	176	434	388	109
ENSG00000175322	377	200	535	417	265	890	340	180	523	404	252	469
ENSG00000259273	0	0	0	0	0	0	0	0	0	0	0	0
ENSG00000204929	0	0	0	0	0	0	1	0	0	0	0	0
ENSG00000204928	0	0	0	0	0	0	0	0	0	0	0	0
ENSG00000204923	75	53	64	80	47	89	62	31	149	82	55	108
ENSG00000204922	193	75	703	148	112	1111	67	14	288	95	23	365
ENSG00000204920	111	98	955	34	100	399	62	79	496	154	94	545
ENSG00000261382	0	0	0	0	0	0	0	0	0	0	0	0
ENSG00000008441	6	7	11	4	1	8	12	20	45	24	25	66
ENSG00000182508	25	11	32	25	13	45	28	21	53	17	14	37
ENSG00000182504	336	235	384	416	263	449	416	294	681	513	316	549
ENSG00000128000	19	129	484	237	143	670	531	237	1638	651	383	1431
ENSG00000121542	219	72	419	133	96	382	295	143	656	305	141	486
ENSG00000264334	0	0	0	0	0	0	0	0	0	0	0	0
ENSG00000234864	0	0	0	0	0	0	0	0	0	0	0	0
ENSG00000254050	0	0	0	0	0	0	0	0	0	0	0	0
ENSG00000124216	162	141	265	169	192	325	13	13	13	7	17	6
ENSG00000238008	0	0	0	0	0	0	0	0	0	0	0	0
ENSG00000214210	0	0	2	0	0	0	0	0	0	0	0	0
ENSG00000214211	0	0	1	1	1	1	0	0	1	0	0	1
ENSG00000104808	19	10	2	7	21	6	0	0	0	0	0	0
ENSG00000234369	34	32	16	22	25	7	16	28	12	28	20	9
ENSG00000234863	0	0	0	0	0	0	0	0	0	0	0	0
ENSG00000254051	0	0	0	0	0	0	0	0	0	0	0	0
ENSG00000104805	2061	2331	3314	2213	2495	4451	2153	2215	2168	2483	3015	2385
ENSG00000104804	23	4	73	41	27	114	21	7	62	24	19	36
ENSG00000247596	754	1093	233	788	1585	303	815	946	227	939	1612	228
ENSG00000227447	0	0	0	0	0	0	0	0	0	0	0	0
ENSG00000239345	46	49	56	39	45	60	16	16	28	19	14	11
ENSG00000239344	1	2	7	0	2	4	1	1	0	0	3	0
ENSG00000234362	0	0	0	0	0	1	9	3	26	10	5	19
ENSG00000237415	39	12	122	31	11	123	29	7	159	34	4	129
ENSG00000237414	0	0	0	0	0	0	0	0	0	0	0	0
ENSG00000237417	19	0	2	19	20	0	0	13	0	15	12	0
ENSG00000106400	947	1169	328	773	1202	397	852	969	463	941	1191	638
ENSG00000237410	0	0	0	0	0	0	0	0	0	0	0	0
ENSG00000177504	0	0	0	0	0	0	0	0	0	0	0	0
ENSG00000106404	32	41	43	57	30	56	161	151	169	255	235	302
ENSG00000280485	0	0	0	0	0	0	0	0	0	0	0	0
ENSG00000177508	25	14	49	26	14	107	0	0	0	0	0	0
ENSG00000237419	0	0	0	0	0	0	0	0	0	0	0	0
ENSG00000237418	2	1	0	1	0	0	2	2	0	2	1	1
ENSG00000254342	0	0	0	0	0	0	0	0	0	0	0	0
ENSG00000257845	0	0	0	0	0	0	0	0	0	0	0	0
ENSG00000187840	3597	4878	2763	3078	4623	2912	419	527	310	536	710	457
ENSG00000199363	4	3	1	1	1	0	0	1	1	1	1	1
ENSG00000199360	0	0	1	0	0	0	0	0	1	0	0	0
ENSG00000199361	0	0	0	0	0	0	0	0	0	0	0	0
ENSG00000199366	0	0	0	1	0	0	0	0	0	0	0	0
ENSG00000249364	0	0	0	0	0	0	0	0	1	0	0	0
ENSG00000199364	0	0	0	0	0	0	0	0	0	0	0	0
ENSG00000239504	0	0	0	0	0	0	0	0	0	0	0	0
ENSG00000187848	3	4	4	10	11	7	0	0	0	0	0	0
ENSG00000202515	1	5	1	1	3	0	26	20	2	20	13	3
ENSG00000199368	0	0	0	0	0	0	0	0	0	0	0	0
ENSG00000202517	0	0	0	0	0	0	0	0	0	0	0	0
ENSG00000123933	296	276	505	353	382	634	406	455	273	530	604	258
ENSG00000202512	2	1	0	0	1	0	0	1	1	1	0	0
ENSG00000202513	0	0	0	0	0	0	0	0	0	0	0	0
ENSG00000140526	1121	1102	523	1407	1362	637	1978	1970	1112	2365	2265	825
ENSG00000140527	0	0	0	2	0	3	1	0	0	0	2	0
ENSG00000140525	2894	3717	1585	3165	3510	1481	3727	4648	2460	4524	5015	3006
ENSG00000140522	0	0	0	0	0	0	0	0	0	0	0	0
ENSG00000235174	3853	4457	220	2905	2652	217	5143	6255	622	7380	5366	492
ENSG00000140521	921	1201	1162	926	1191	1330	1361	1286	1787	1713	1778	1440
ENSG00000246541	0	0	0	0	0	0	0	0	0	0	0	0
ENSG00000267978	2	0	4	0	0	0	0	0	0	0	0	0
ENSG00000167107	211	239	191	203	205	201	302	286	271	255	283	274
ENSG00000167106	418	798	856	923	931	870	1229	1127	1575	1621	1473	1464
ENSG00000280734	55	20	78	47	40	64	75	86	197	213	88	50
ENSG00000167104	0	0	0	0	0	0	0	0	0	0	0	0
ENSG00000167103	52	56	118	86	67	227	0	2	9	3	3	2
ENSG00000239503	0	0	0	0	0	0	0	0	0	0	0	0
ENSG00000167100	47	64	65	84	105	67	19	10	21	17	17	16
ENSG00000240265	0	1	0	1	1	0	0	0	0	0	0	0
ENSG00000280739	14	20	16	15	18	24	26	13	22	31	20	29
ENSG00000180042	0	0	0	0	0	0	0	0	0	0	0	0
ENSG00000244945	0	0	0	0	0	0	4	2	2	3	2	0
ENSG00000166851	2242	3281	724	2899	3556	885	1063	1451	336	1393	1643	281
ENSG00000166856	0	0	0	0	0	0	0	0	0	0	0	0
ENSG00000207357	9	7	2	9	6	4	7	4	6	7	3	3
ENSG00000166855	1352	1319	1289	1444	1388	1458	1564	1501	2278	2344	1693	2032
ENSG00000207359	1	0	1	0	1	2	1	1	3	0	1	1
ENSG00000163374	1602	1452	2223	1765	1325	2093	2180	1862	3561	2519	2016	3028
ENSG00000163376	866	496	1240	718	379	1525	223	42	462	272	108	366
ENSG00000163377	336	382	97	337	345	100	0	0	0	0	0	0
ENSG00000163378	333	334	200	577	525	195	214	205	161	260	256	116
ENSG00000255149	0	0	0	0	0	0	0	0	0	0	0	0
ENSG00000255148	0	0	0	0	0	0	0	0	0	1	0	0
ENSG00000255143	0	0	0	0	0	0	0	0	0	0	0	0
ENSG00000255142	6	2	5	3	3	8	9	6	20	12	3	16
ENSG00000276744	8	10	9	8	8	11	3	8	6	7	4	9
ENSG00000255140	0	0	0	0	0	0	0	0	0	0	0	0
ENSG00000255147	0	0	0	0	0	0	0	0	0	0	0	0
ENSG00000255146	0	0	2	1	0	1	0	0	0	0	0	0
ENSG00000276740	2	1	4	0	0	6	0	0	0	0	0	0
ENSG00000255144	0	0	0	0	0	0	0	0	0	0	0	0
ENSG00000282393	3	1	2	2	2	3	61	36	132	78	40	106
ENSG00000282390	9	2	29	12	3	35	2	2	3	3	2	1
ENSG00000264705	0	0	0	0	0	0	0	0	0	0	0	0
ENSG00000249830	0	0	0	0	0	0	0	0	0	0	0	0
ENSG00000227818	0	0	0	0	0	0	0	0	0	0	0	0
ENSG00000056586	1250	1191	557	1456	1421	569	992	941	512	1215	974	444
ENSG00000227814	0	0	0	0	0	0	0	0	0	0	0	0
ENSG00000227815	0	0	0	0	0	0	0	0	0	0	0	0
ENSG00000227817	1	1	1	0	0	0	0	0	0	0	0	0
ENSG00000227811	64	30	159	68	38	200	3	0	10	2	2	8
ENSG00000252252	0	0	0	0	0	0	0	0	0	0	0	0
ENSG00000227813	0	0	0	0	0	0	0	0	0	0	0	0
ENSG00000265411	0	0	1	0	1	0	1	1	1	1	1	0
ENSG00000128849	3617	1696	9093	4616	2237	11198	5	4	20	2	3	11
ENSG00000064393	1331	1058	1371	1674	1346	1758	5840	4178	8250	7943	6088	7095
ENSG00000230794	0	0	0	0	0	0	0	0	0	0	0	0
ENSG00000225526	2	1	4	4	4	2	0	0	0	0	0	1
ENSG00000225527	1	1	2	2	3	2	4	5	5	3	4	7
ENSG00000241135	0	0	0	0	0	0	26	8	76	45	15	82
ENSG00000241134	0	0	0	0	0	0	4	2	7	4	0	8
ENSG00000225522	0	0	0	0	0	0	0	0	0	0	0	0
ENSG00000225523	0	0	0	0	0	0	0	0	0	0	0	0
ENSG00000225520	0	0	0	0	0	0	0	0	0	0	0	0
ENSG00000241130	0	0	0	0	0	0	0	0	0	0	0	0
ENSG00000253460	0	0	0	0	0	0	0	0	0	0	0	0
ENSG00000225528	1	2	1	1	1	0	9	14	21	12	13	24
ENSG00000259502	0	1	0	0	0	3	3	0	3	0	0	0
ENSG00000157005	0	4	0	3	10	0	0	0	0	0	0	0
ENSG00000218776	0	0	0	0	0	0	0	0	0	0	0	0
ENSG00000184014	1737	1479	2085	1745	1668	2103	979	848	1582	1078	931	1197
ENSG00000184012	146	164	181	209	159	203	0	0	0	0	0	0
ENSG00000162753	0	0	4	0	0	0	0	0	0	0	0	0
ENSG00000253465	0	0	0	0	0	0	0	0	0	0	0	0
ENSG00000179820	1007	1053	2197	1959	630	1437	39	51	32	39	45	22
ENSG00000179826	0	0	0	0	0	0	0	0	0	0	0	0
ENSG00000162426	13	19	52	39	32	80	0	1	2	4	1	1
ENSG00000275788	0	0	0	0	0	0	0	0	0	0	0	0
ENSG00000205078	3	0	3	0	0	12	2	3	7	0	0	0
ENSG00000268204	0	0	0	2	0	3	10	7	34	9	9	34
ENSG00000268205	604	616	164	462	483	135	383	446	150	527	482	140
ENSG00000200829	0	0	0	0	0	0	0	0	0	0	0	0
ENSG00000279189	0	0	0	0	0	0	0	0	0	0	0	0
ENSG00000268201	7	5	12	8	7	12	8	11	35	20	15	24
ENSG00000268203	5	2	7	4	1	13	1	0	3	1	2	3
ENSG00000200822	0	0	0	0	0	0	0	0	0	0	0	0
ENSG00000279184	0	0	0	0	0	0	2	1	4	1	2	2
ENSG00000279187	0	0	0	0	0	0	0	0	0	0	0	1
ENSG00000279186	2	3	2	2	2	2	1	1	1	1	1	1
ENSG00000279181	0	0	0	0	0	0	0	0	0	0	0	0
ENSG00000268209	0	0	0	0	0	0	0	0	0	0	0	0
ENSG00000279183	1	0	0	0	0	0	0	1	0	0	0	0
ENSG00000279182	0	0	0	0	0	0	7	0	25	8	1	39
ENSG00000204118	285	72	1000	372	127	1289	0	0	0	0	0	0
ENSG00000272113	0	0	0	0	0	0	0	0	0	0	0	0
ENSG00000250624	0	0	0	0	0	0	0	0	0	0	0	0
ENSG00000204113	0	0	1	0	0	1	1	0	9	3	1	6
ENSG00000204110	18	4	16	9	5	24	26	8	80	45	12	57
ENSG00000204116	299	171	429	269	139	226	415	216	362	297	315	341
ENSG00000204117	0	0	0	0	0	0	0	0	0	0	0	0
ENSG00000201196	0	0	0	0	0	0	0	0	0	0	0	0
ENSG00000222610	0	0	0	0	0	0	0	0	0	0	0	0
ENSG00000207151	0	0	0	0	0	0	0	0	0	0	0	0
ENSG00000137145	605	397	841	791	579	943	1319	918	2779	1924	1263	2000
ENSG00000137142	307	406	74	394	617	76	0	2	0	0	0	0
ENSG00000201198	0	0	0	0	0	0	0	0	0	0	0	0
ENSG00000264906	0	0	0	0	0	0	0	0	0	0	0	0
ENSG00000259274	0	0	2	0	0	0	6	0	6	2	7	2
ENSG00000250623	0	0	0	0	0	0	0	0	0	0	0	0
ENSG00000205076	0	0	0	0	0	0	0	0	0	0	0	0
ENSG00000109572	1160	793	1869	1272	933	1379	971	735	1924	1274	858	1527
ENSG00000233888	0	0	0	0	0	0	0	0	0	0	0	0
ENSG00000252257	0	0	0	0	0	0	0	0	0	0	0	0
ENSG00000201671	0	0	0	0	0	0	0	0	0	0	0	0
ENSG00000233882	0	0	0	0	0	0	0	0	0	0	0	0
ENSG00000233880	0	0	0	0	0	0	0	0	0	0	0	0
ENSG00000233887	0	0	0	0	0	0	0	0	0	0	0	0
ENSG00000233884	0	0	0	0	0	0	0	0	0	0	0	0
ENSG00000233885	2	0	12	0	0	0	0	0	5	2	0	2
ENSG00000270377	0	0	0	0	0	0	0	0	0	0	0	0
ENSG00000270371	0	0	0	0	0	0	0	0	0	0	0	0
ENSG00000270372	0	0	0	0	0	0	0	0	0	0	0	0
ENSG00000283117	0	0	0	0	0	0	0	0	0	0	0	0
ENSG00000250629	0	0	0	0	0	0	0	0	0	0	0	0
ENSG00000270379	0	0	0	0	0	0	1	0	9	6	4	5
ENSG00000270378	0	1	0	0	1	0	0	0	1	1	1	0
ENSG00000283110	0	0	0	0	0	0	0	0	0	0	0	0
ENSG00000278582	0	0	0	0	0	0	0	0	0	0	0	0
ENSG00000278580	0	0	0	0	0	0	0	0	0	0	0	0
ENSG00000104756	532	537	164	563	504	235	758	766	388	983	789	272
ENSG00000278586	0	0	0	0	0	0	0	0	0	0	0	1
ENSG00000278587	0	0	0	0	0	0	0	0	0	0	0	0
ENSG00000278585	0	0	0	0	0	0	0	0	0	0	0	0
ENSG00000278588	9	18	3	8	10	1	9	9	3	13	16	5
ENSG00000278589	0	0	0	0	0	0	0	0	0	0	0	0
ENSG00000252936	0	0	0	0	0	0	0	0	0	0	0	0
ENSG00000001561	173	119	255	220	157	274	845	534	1436	1047	616	915
ENSG00000159128	657	878	761	876	728	792	2076	1901	1787	2497	2169	2021
ENSG00000252255	0	1	0	0	0	0	0	0	0	0	0	0
ENSG00000122912	120	119	91	123	129	70	280	288	264	301	310	207
ENSG00000258451	3	3	8	0	6	11	0	0	0	0	0	0
ENSG00000258456	0	0	0	0	0	0	0	0	0	0	0	0
ENSG00000253259	0	0	0	0	0	1	0	0	0	0	0	0
ENSG00000253258	0	0	0	0	0	0	0	0	1	0	0	0
ENSG00000257976	0	0	2	1	0	2	0	0	6	1	1	1
ENSG00000253251	53	26	145	50	34	152	85	3	276	94	20	193
ENSG00000129038	143	119	154	148	118	193	0	0	0	0	0	0
ENSG00000253252	0	4	0	0	3	0	0	0	0	0	0	0
ENSG00000274319	0	0	0	0	0	0	0	0	0	0	0	0
ENSG00000154065	76	52	256	75	45	278	31	13	77	24	14	48
ENSG00000205240	4	4	1	3	3	0	11	11	3	14	8	4
ENSG00000254278	0	0	0	0	0	0	0	0	0	0	0	0
ENSG00000251311	0	0	0	0	0	0	0	0	0	0	0	0
ENSG00000271715	1	1	0	1	1	0	0	0	0	0	0	0
ENSG00000271716	0	0	0	0	0	0	0	0	0	0	0	0
ENSG00000271717	0	0	0	0	0	0	0	0	0	0	0	0
ENSG00000102128	1	0	1	0	0	2	3	3	6	2	3	8
ENSG00000252258	0	0	0	0	0	0	0	0	0	0	0	0
ENSG00000107223	2974	3595	3797	2702	2866	4164	3089	2580	3660	3632	3974	3655
ENSG00000279547	0	0	0	0	0	0	0	0	0	0	0	0
ENSG00000258399	5	11	4	10	12	6	0	0	0	0	0	0
ENSG00000152969	85	71	180	87	81	273	207	109	558	203	128	611
ENSG00000232823	0	0	0	0	0	0	0	0	0	0	0	0
ENSG00000232821	0	0	0	0	0	0	0	0	0	0	0	0
ENSG00000232827	0	0	0	0	0	0	0	0	0	0	0	0
ENSG00000232825	0	0	0	0	0	0	0	0	0	0	0	0
ENSG00000232824	0	0	0	0	0	0	1	0	0	0	0	0
ENSG00000279549	4	2	0	6	3	1	3	4	0	2	5	4
ENSG00000232829	0	0	0	0	1	0	0	0	1	0	0	0
ENSG00000232828	0	0	0	0	0	1	1	0	2	0	0	2
ENSG00000146352	40	14	39	44	30	50	0	0	0	0	0	0
ENSG00000263932	0	0	0	0	0	0	0	0	0	0	0	0
ENSG00000120519	74	100	32	118	57	13	499	408	190	503	400	144
ENSG00000155330	493	315	909	571	317	991	682	389	1288	838	487	1157
ENSG00000267766	0	0	0	0	0	0	10	7	7	6	8	3
ENSG00000235890	45	13	132	50	16	164	0	0	0	0	0	0
ENSG00000201679	0	0	0	0	0	0	0	0	0	0	0	0
ENSG00000278635	0	0	0	0	0	0	0	0	0	0	0	0
ENSG00000037749	155	125	185	77	51	456	56	86	291	88	113	253
ENSG00000273055	4	1	7	3	0	5	7	4	8	10	6	11
ENSG00000273621	0	0	0	0	0	0	0	1	0	0	0	0
ENSG00000273051	0	0	0	0	0	0	0	0	0	0	0	0
ENSG00000170523	0	0	0	0	0	0	0	0	0	0	0	0
ENSG00000170522	4721	3602	7356	4805	3556	7092	709	464	1606	896	658	1220
ENSG00000170525	580	371	865	728	597	2357	982	389	1429	1149	609	2958
ENSG00000273058	7	7	21	7	3	17	35	15	69	33	11	71
ENSG00000273627	0	0	1	0	0	0	1	0	1	1	1	1
ENSG00000164548	1874	2159	1238	2107	1487	965	2018	2127	2439	2455	2204	1555
ENSG00000198553	8	4	14	4	1	11	17	0	2	19	2	10
ENSG00000198551	572	132	1774	596	238	880	306	22	1085	362	98	919
ENSG00000198556	58	31	135	80	69	122	422	240	1001	545	326	796
ENSG00000198554	2174	2023	1958	2674	2459	2145	1530	1308	1783	1859	1543	1307
ENSG00000198555	0	0	0	0	0	0	0	0	0	0	0	0
ENSG00000241907	0	0	0	0	0	0	0	0	0	0	0	0
ENSG00000163612	0	0	0	0	0	0	0	0	0	0	0	0
ENSG00000241905	0	0	0	0	0	0	0	0	0	0	0	0
ENSG00000075223	25	15	49	38	51	77	0	0	3	0	0	0
ENSG00000227035	0	0	0	0	0	0	0	0	0	0	0	0
ENSG00000164542	16	9	21	19	19	28	4	1	15	4	2	9
ENSG00000160714	2376	1006	6634	2307	988	5696	2337	868	7049	2736	1090	5955
ENSG00000160712	168	13	242	133	125	37	92	69	159	125	109	166
ENSG00000160710	9545	7183	14689	10339	8506	15611	14170	9386	27227	15971	12041	20688
ENSG00000215160	0	0	0	1	0	2	0	0	0	0	0	0
ENSG00000136950	1032	574	2472	769	547	2333	1530	667	5339	1891	785	4663
ENSG00000215162	0	0	0	0	0	0	0	0	0	0	0	0
ENSG00000215165	0	0	0	0	0	1	0	0	0	0	0	0
ENSG00000083307	1003	348	2941	974	499	2806	0	0	0	0	0	0
ENSG00000096080	934	848	1742	839	781	1840	888	593	1752	974	712	1809
ENSG00000280055	0	0	0	0	0	0	0	0	0	0	0	0
ENSG00000267458	0	0	0	0	0	0	0	0	0	0	0	0
ENSG00000280054	0	1	0	0	0	0	0	1	1	0	0	0
ENSG00000258869	0	0	0	0	0	0	0	0	0	0	0	0
ENSG00000267459	3	2	1	1	2	4	1	1	3	1	3	1
ENSG00000175467	1322	1279	3185	1338	1480	3671	1407	855	2991	1669	1450	3154
ENSG00000237864	0	0	0	0	0	0	0	0	0	0	0	0
ENSG00000252934	0	0	0	0	0	0	0	0	0	0	0	0
ENSG00000181214	0	0	0	0	0	0	0	0	0	0	0	0
ENSG00000175463	0	0	9	1	5	6	713	327	2042	766	529	2066
ENSG00000105402	598	668	263	487	658	254	1019	1033	444	841	1167	269
ENSG00000105401	2067	2449	3184	1822	2526	3014	2393	1612	3950	3132	2771	3725
ENSG00000279979	0	0	0	0	0	0	0	0	1	0	0	0
ENSG00000105404	298	459	57	234	617	102	91	132	37	122	224	35
ENSG00000131459	5035	4955	6658	5260	4583	6327	15	9	11	23	17	11
ENSG00000279976	0	0	0	0	0	0	0	0	1	1	0	0
ENSG00000105409	1095	1425	554	1148	1408	532	43	44	28	67	61	35
ENSG00000279970	13	8	17	10	10	15	0	0	0	0	0	1
ENSG00000279971	0	0	0	0	0	0	0	0	0	0	0	0
ENSG00000279972	0	0	0	0	0	0	0	0	0	0	0	0
ENSG00000222005	0	0	0	0	0	0	2	0	5	1	0	4
ENSG00000092140	1306	1254	1086	2212	1432	1234	577	479	480	775	487	336
ENSG00000181218	134	106	53	98	105	48	18	20	11	22	32	19
ENSG00000132185	0	0	0	0	0	1	5261	6026	2024	6523	6459	2511
ENSG00000108639	652	672	957	611	707	806	4118	4744	4900	6137	7793	6336
ENSG00000219314	0	0	0	0	0	0	0	0	0	0	0	0
ENSG00000132182	2979	2829	3664	3324	3913	3403	8803	6125	13154	10012	8642	10269
ENSG00000267450	0	0	0	0	0	0	0	0	0	0	0	0
ENSG00000237999	0	0	0	0	0	0	0	0	0	0	0	0
ENSG00000222009	11	2	20	5	3	8	34	9	14	15	10	15
ENSG00000237994	0	0	0	0	0	0	0	0	0	0	0	0
ENSG00000150681	0	0	0	0	0	0	0	0	0	0	0	0
ENSG00000237990	0	0	0	0	0	0	0	0	0	0	0	0
ENSG00000237991	257	332	34	264	280	30	301	439	36	396	544	41
ENSG00000237992	0	0	0	0	0	0	0	0	0	0	0	0
ENSG00000237993	0	0	0	0	0	0	0	0	0	0	0	0
ENSG00000244249	0	0	0	0	0	0	0	0	0	0	0	0
ENSG00000199609	0	0	0	0	0	0	0	0	0	0	0	0
ENSG00000014919	977	1086	494	1092	1106	637	1343	1374	957	1658	1571	841
ENSG00000188029	0	0	0	0	0	0	0	0	0	0	0	0
ENSG00000267456	0	0	0	0	0	0	0	0	1	0	0	0
ENSG00000244247	0	0	0	0	0	0	0	0	0	0	0	0
ENSG00000199601	0	0	0	0	0	0	0	0	0	0	0	0
ENSG00000131981	122	178	23	104	126	28	1278	1427	264	1622	1507	212
ENSG00000131982	0	1	0	0	0	0	0	0	0	0	0	0
ENSG00000199605	0	0	0	0	0	0	0	0	0	0	0	0
ENSG00000188026	177	63	284	126	85	390	19	7	60	19	11	44
ENSG00000273942	21	10	21	18	12	30	1	0	1	0	0	1
ENSG00000273940	0	0	0	0	0	0	1	0	0	0	0	1
ENSG00000273946	0	0	0	0	0	0	0	0	0	0	0	0
ENSG00000273945	1	1	1	1	1	1	1	1	1	0	1	0
ENSG00000166337	1774	1899	568	1198	1374	582	1390	835	339	1493	1564	250
ENSG00000273948	0	0	0	0	0	0	0	0	0	0	0	0
ENSG00000240747	0	2	0	0	0	0	0	0	0	0	0	0
ENSG00000272097	3	0	6	0	0	10	13	0	65	21	0	52
ENSG00000272094	0	0	0	0	0	0	0	0	3	0	2	6
ENSG00000272092	1	0	4	0	2	2	6	3	14	5	3	12
ENSG00000084652	1571	1098	2723	1463	1181	2826	2415	1515	5530	2828	1700	4691
ENSG00000200799	0	0	0	0	0	0	0	0	0	0	0	0
ENSG00000214691	0	0	0	0	0	0	0	0	0	0	0	0
ENSG00000214694	11	15	3	17	12	15	0	0	1	0	0	0
ENSG00000214695	0	0	0	0	0	0	0	0	0	1	0	0
ENSG00000172167	215	263	65	288	309	77	290	310	145	383	374	130
ENSG00000230485	0	0	0	0	0	0	0	0	0	0	0	0
ENSG00000172164	742	519	993	827	626	1097	135	92	219	112	73	116
ENSG00000200795	4	1	0	4	2	0	1	3	4	2	5	2
ENSG00000230483	0	0	0	0	0	0	0	0	0	0	0	0
ENSG00000200796	0	0	0	0	0	0	0	0	0	0	0	0
ENSG00000276298	0	0	0	0	0	0	0	0	0	0	0	0
ENSG00000230480	0	0	0	0	1	0	0	0	0	0	1	0
ENSG00000260592	0	0	0	0	0	2	0	0	0	0	0	0
ENSG00000264229	1	1	0	1	1	3	5	2	4	1	1	2
ENSG00000174576	13	3	69	13	6	33	3	2	1	2	0	0
ENSG00000214342	0	0	0	0	0	0	0	0	0	0	0	0
ENSG00000222297	0	0	0	0	0	0	1	0	1	0	0	0
ENSG00000148386	0	0	0	0	0	0	0	0	0	0	0	0
ENSG00000214347	0	0	0	0	0	0	0	0	0	0	0	0
ENSG00000214344	0	0	0	0	0	0	0	0	0	0	0	0
ENSG00000020426	678	972	229	700	874	225	479	500	276	590	554	227
ENSG00000233440	0	0	0	0	0	0	0	0	0	0	0	0
ENSG00000204959	682	222	2589	961	385	3509	82	16	309	88	22	232
ENSG00000233441	0	0	0	0	0	0	2	2	10	0	0	8
ENSG00000229155	0	0	0	0	0	0	0	0	0	0	0	0
ENSG00000229154	0	0	0	0	0	0	0	0	0	0	0	0
ENSG00000101871	2126	787	5298	2207	1054	4399	14	3	31	7	7	12
ENSG00000138115	19	12	15	21	5	0	7	6	21	17	11	8
ENSG00000275479	3	2	1	6	1	2	3	0	2	2	0	1
ENSG00000138111	156	209	90	188	215	105	60	45	30	53	81	23
ENSG00000172789	0	0	0	0	0	0	6	2	2	2	4	1
ENSG00000275475	0	0	0	0	0	0	0	0	0	0	0	0
ENSG00000172785	757	1012	318	637	687	263	886	888	689	1176	1086	594
ENSG00000275476	0	0	0	1	0	1	2	1	1	2	1	3
ENSG00000138119	92	100	38	84	101	24	0	15	0	2	8	0
ENSG00000172780	559	411	193	549	495	1256	292	201	510	345	264	497
ENSG00000150201	0	0	0	0	0	0	0	0	0	0	0	0
ENSG00000144724	2353	1746	2641	2741	3960	3364	20	27	31	21	18	27
ENSG00000261410	0	0	0	0	0	0	0	0	0	0	0	0
ENSG00000156689	5	2	10	8	9	5	1	0	0	0	0	0
ENSG00000271544	0	0	0	0	0	0	0	0	0	0	0	0
ENSG00000271547	0	0	0	0	0	1	0	0	0	0	0	0
ENSG00000271546	0	0	0	0	0	0	0	0	0	0	0	0
ENSG00000271543	0	0	0	0	0	0	0	0	0	0	0	0
ENSG00000236119	0	0	0	0	0	0	0	0	0	0	0	0
ENSG00000236118	0	0	0	0	0	0	0	0	0	0	0	0
ENSG00000236111	15	20	5	16	28	6	21	16	3	24	23	3
ENSG00000236110	0	0	0	0	0	0	0	0	0	0	0	0
ENSG00000236117	1	0	2	0	0	0	0	0	0	0	0	0
ENSG00000236116	0	0	0	0	0	0	0	0	0	0	0	0
ENSG00000236115	0	0	0	0	0	0	0	0	0	0	0	0
ENSG00000236114	0	0	0	0	0	0	0	0	0	0	0	0
ENSG00000196924	20237	28246	10843	22204	40201	12717	15331	15693	9721	18484	24782	9250
ENSG00000224922	0	0	0	0	0	0	0	0	0	0	0	0
ENSG00000224924	0	0	0	0	0	0	0	0	0	0	0	0
ENSG00000196923	503	627	346	350	453	334	364	348	342	461	620	306
ENSG00000196922	302	175	901	346	182	895	224	90	767	303	143	690
ENSG00000174780	5530	6019	3187	5787	4868	3110	4401	4716	2603	5686	4948	2199
ENSG00000260596	0	0	0	0	0	0	0	0	0	0	0	0
ENSG00000232314	0	0	0	0	0	0	0	0	0	0	0	0
ENSG00000265579	108	81	27	117	81	45	0	0	0	0	0	0
ENSG00000260597	0	0	0	0	0	0	0	3	2	6	1	1
ENSG00000265574	19	11	34	27	16	29	7	3	5	3	2	1
ENSG00000173786	686	622	1781	784	745	1579	937	544	1297	724	642	1310
ENSG00000117877	556	324	1687	580	319	1665	85	16	632	116	41	652
ENSG00000276162	0	0	0	0	0	0	0	0	0	0	0	0
ENSG00000233691	0	0	0	0	0	0	0	0	0	0	0	0
ENSG00000181803	0	0	0	0	0	0	1	8	4	7	5	5
ENSG00000235029	0	0	0	0	0	0	0	0	0	0	0	0
ENSG00000233699	0	0	0	0	0	0	0	0	0	0	0	0
ENSG00000252739	0	0	0	0	0	0	0	0	0	0	0	0
ENSG00000232124	0	0	0	0	0	0	0	0	0	0	0	0
ENSG00000232125	0	0	0	0	0	0	1	1	0	0	1	0
ENSG00000238186	0	0	0	0	0	0	0	0	0	0	0	0
ENSG00000203620	0	0	0	0	0	0	0	0	0	0	0	0
ENSG00000238184	8	4	19	11	3	17	1	0	5	1	0	1
ENSG00000238185	0	0	0	0	0	0	0	0	0	0	0	0
ENSG00000238188	0	0	0	0	0	0	0	0	0	0	0	0
ENSG00000238189	0	0	0	0	0	0	0	0	0	0	0	0
ENSG00000232128	0	0	0	0	0	0	0	0	0	0	1	0
ENSG00000116473	835	835	140	783	755	133	4259	5177	2919	6340	5618	2269
ENSG00000112996	1963	1905	1211	2197	1828	1321	1314	1207	1104	1715	1536	871
ENSG00000280378	6	8	1	3	4	1	23	15	14	18	23	6
ENSG00000112992	548	627	167	591	760	185	1681	2113	795	2147	2291	490
ENSG00000247624	0	0	0	0	0	0	0	2	0	0	2	0
ENSG00000116478	2487	2888	811	2394	3046	837	3893	4814	1320	4455	5026	1075
ENSG00000215871	1	1	1	3	1	1	1	0	6	3	0	1
ENSG00000252593	0	0	0	0	0	0	0	0	0	0	0	0
ENSG00000207025	0	0	0	0	0	0	0	0	0	0	0	0
ENSG00000223656	0	0	0	0	0	0	0	0	0	0	0	0
ENSG00000223657	4	5	2	4	5	2	0	0	0	0	0	0
ENSG00000223655	0	0	0	0	0	0	0	0	0	0	0	0
ENSG00000223652	0	0	0	0	0	0	0	0	0	0	0	0
ENSG00000274709	0	0	0	0	0	0	0	0	0	0	1	0
ENSG00000223650	1	0	1	0	1	0	1	1	3	1	0	0
ENSG00000223651	0	0	0	0	0	0	2	0	7	1	3	2
ENSG00000274704	0	0	0	0	0	0	0	0	0	0	0	0
ENSG00000252595	0	0	0	0	0	0	0	0	0	0	0	0
ENSG00000274701	6	1	1	0	4	0	0	0	0	0	0	0
ENSG00000223658	0	0	3	0	0	3	0	0	0	0	0	0
ENSG00000099866	9	2	16	15	10	45	2	2	2	4	0	1
ENSG00000151150	1554	1010	2642	2133	1612	3092	0	2	3	0	0	2
ENSG00000099864	205	42	235	55	75	238	15	11	36	18	10	37
ENSG00000206795	0	0	0	0	0	0	0	0	0	0	0	0
ENSG00000270638	5	5	6	11	2	11	3	2	11	7	4	5
ENSG00000270639	0	0	0	1	0	0	0	0	0	0	0	0
ENSG00000099860	145	43	222	64	62	388	698	308	4090	1699	625	3203
ENSG00000270634	0	0	0	0	0	0	0	0	0	0	0	0
ENSG00000218991	0	0	0	0	0	0	0	0	0	0	0	0
ENSG00000261411	1	0	0	0	0	0	0	0	0	0	0	0
ENSG00000218996	20	3	43	15	7	57	3	4	12	8	4	9
ENSG00000270632	0	0	0	0	0	0	0	0	0	0	0	0
ENSG00000021488	0	0	0	0	0	0	1	0	0	0	0	2
ENSG00000266179	0	0	0	0	0	0	0	0	0	0	0	0
ENSG00000106245	1771	2662	345	1748	1825	270	1186	1513	290	1596	1932	306
ENSG00000106244	4421	4719	5262	3891	3856	5260	2936	2681	3796	3294	3092	3266
ENSG00000072210	1658	1426	654	1785	1390	1804	460	449	397	545	414	325
ENSG00000166484	310	204	646	311	270	1027	174	76	558	186	159	596
ENSG00000266171	0	0	0	0	0	0	0	0	0	0	0	0
ENSG00000269300	0	0	0	0	0	0	0	0	0	0	0	0
ENSG00000266173	532	470	904	488	459	603	580	527	1028	769	789	1156
ENSG00000266174	0	0	0	0	0	0	0	0	0	0	0	0
ENSG00000269307	0	0	0	0	0	0	0	0	0	0	1	0
ENSG00000269304	0	3	0	2	1	0	0	1	1	1	2	1
ENSG00000252734	0	0	0	0	0	0	0	0	0	0	0	0
ENSG00000212348	0	0	0	0	0	0	0	0	0	1	0	0
ENSG00000100836	4204	4766	6109	3777	2133	5882	2859	1966	5086	3343	1962	4388
ENSG00000212340	0	0	0	0	0	0	0	0	0	0	0	0
ENSG00000212342	0	0	0	0	0	0	0	0	0	0	0	0
ENSG00000212344	0	1	0	0	0	0	0	0	0	0	0	0
ENSG00000212345	0	0	0	0	0	0	0	0	0	0	0	0
ENSG00000212347	0	0	0	0	0	0	0	0	0	0	0	0
ENSG00000236809	28	9	65	23	14	101	29	28	39	40	28	32
ENSG00000270535	0	0	0	0	0	0	0	0	0	0	0	0
ENSG00000236801	112	149	25	95	210	23	97	160	14	121	220	12
ENSG00000236800	0	0	0	0	0	0	2	0	0	0	0	4
ENSG00000236803	0	0	0	0	0	0	0	0	0	0	0	0
ENSG00000236804	2	1	0	0	0	0	0	0	0	0	0	1
ENSG00000236807	0	0	0	0	0	0	0	0	0	0	0	0
ENSG00000236806	1	0	1	0	1	0	0	0	1	1	0	0
ENSG00000230197	0	3	0	0	0	0	0	0	0	0	0	0
ENSG00000243694	0	0	0	0	0	0	0	0	2	2	0	3
ENSG00000228367	0	0	1	0	1	0	0	1	0	0	0	0
ENSG00000153790	83	34	129	93	41	186	204	147	636	323	176	425
ENSG00000250874	0	0	0	0	0	0	0	0	0	0	0	0
ENSG00000228124	0	0	0	0	0	0	0	4	14	0	2	10
ENSG00000228127	0	0	0	0	0	0	0	0	0	0	0	0
ENSG00000250877	0	0	0	0	0	0	0	0	0	0	0	0
ENSG00000228121	0	1	0	2	1	1	0	0	1	1	1	2
ENSG00000228120	0	0	0	0	0	0	0	0	0	0	0	0
ENSG00000228123	0	0	0	0	0	0	0	0	0	0	0	0
ENSG00000228122	0	0	0	0	0	0	0	0	0	0	0	0
ENSG00000243695	3	1	9	2	1	5	0	0	0	0	0	0
ENSG00000234409	0	0	0	0	0	0	0	0	0	0	0	0
ENSG00000142765	35	48	27	12	69	53	228	197	227	344	479	262
ENSG00000250878	0	0	0	1	0	0	4	3	5	3	1	5
ENSG00000113643	3236	3596	1516	2404	2676	1275	2532	2882	2456	3416	3200	2084
ENSG00000113645	1022	1069	976	905	1030	886	136	135	115	180	196	71
ENSG00000113649	2345	1561	4844	3733	2286	4742	3249	2009	7868	4498	2705	5438
ENSG00000113648	2000	3142	860	1868	2447	928	3334	4461	1727	3830	4119	1317
ENSG00000224857	0	0	0	0	0	0	0	0	0	0	0	0
ENSG00000169432	112	76	182	158	108	239	0	0	0	0	0	0
ENSG00000169435	2	4	5	6	2	18	259	121	608	252	136	406
ENSG00000264769	0	0	0	0	0	0	0	0	0	0	0	0
ENSG00000169436	65	36	138	60	109	140	0	0	7	0	0	0
ENSG00000169439	1778	2230	1358	1802	2949	1658	0	0	0	0	0	0
ENSG00000260419	0	0	0	0	0	0	0	0	0	0	0	0
ENSG00000264765	0	0	0	0	0	0	0	0	0	0	0	0
ENSG00000264764	0	0	0	0	0	0	0	0	1	0	0	0
ENSG00000264763	0	0	0	0	0	0	0	0	0	0	0	0
ENSG00000264760	0	0	0	0	0	0	0	0	0	0	0	0
ENSG00000241229	0	0	0	0	0	0	0	0	0	0	0	0
ENSG00000189030	0	0	1	0	0	0	0	0	0	0	0	0
ENSG00000189037	0	0	0	0	0	0	0	0	0	0	0	0
ENSG00000262089	2	2	3	1	3	4	14	4	27	11	10	24
ENSG00000215029	0	0	3	0	0	4	0	0	0	0	0	0
ENSG00000262085	2	0	2	2	0	4	0	0	0	0	0	0
ENSG00000111647	514	374	634	752	556	799	634	471	896	850	537	789
ENSG00000111641	2062	1509	3303	1757	1402	2985	2159	1509	4362	2334	1649	3952
ENSG00000111640	114057	175774	9699	111706	158357	8290	148940	197834	9325	155577	240406	9800
ENSG00000111642	12335	12423	15191	13021	13103	16647	8286	7768	11230	9559	8994	10079
ENSG00000267227	0	0	0	0	0	1	0	0	0	0	0	0
ENSG00000267226	21	5	51	12	9	45	11	6	45	16	7	42
ENSG00000267225	0	0	0	0	0	2	0	0	0	0	0	0
ENSG00000267224	0	0	0	0	0	0	0	0	0	0	0	0
ENSG00000267223	0	0	0	0	0	0	0	0	0	0	0	0
ENSG00000267222	1	0	1	1	2	0	0	0	3	5	1	0
ENSG00000103569	0	0	0	0	0	0	29	20	71	26	16	36
ENSG00000215326	2	6	1	2	3	1	2	1	1	3	4	0
ENSG00000142494	38	38	16	39	35	18	5	5	2	2	5	4
ENSG00000215325	1	0	0	0	0	0	0	0	0	0	0	0
ENSG00000267228	0	0	0	0	0	0	0	0	0	0	0	0
ENSG00000254016	0	0	0	0	0	0	0	0	0	0	0	0
ENSG00000263935	0	0	0	0	0	0	0	0	0	0	0	0
ENSG00000263934	285	369	15	173	412	10	157	201	103	216	202	78
ENSG00000208036	0	1	0	0	1	0	1	1	0	1	2	1
ENSG00000114030	1817	1251	2703	1884	1505	2623	1624	1348	2304	2143	1525	1555
ENSG00000254017	0	0	0	1	0	0	9	3	22	3	2	11
ENSG00000270445	0	0	0	0	0	0	0	0	0	0	0	0
ENSG00000263938	1	0	1	2	1	2	0	0	0	0	0	0
ENSG00000261687	0	0	0	0	0	0	0	0	0	0	0	0
ENSG00000254015	0	0	0	0	0	0	0	0	0	0	0	0
ENSG00000261683	0	0	0	0	0	0	0	0	3	0	0	0
ENSG00000261682	0	0	0	0	0	0	0	0	0	0	0	0
ENSG00000261680	0	0	0	0	0	0	0	0	0	0	0	0
ENSG00000156313	151	136	139	169	170	220	302	270	453	336	276	331
ENSG00000039537	0	0	0	0	0	0	0	0	0	0	0	0
ENSG00000261689	0	0	0	0	0	0	0	0	0	0	0	0
ENSG00000254013	8	6	3	4	5	1	8	7	1	9	7	1
ENSG00000266692	0	0	1	1	1	0	1	1	1	1	1	1
ENSG00000262332	0	0	0	0	0	0	0	0	0	0	0	0
ENSG00000254010	0	0	0	0	2	2	0	0	0	0	0	0
ENSG00000224850	0	0	0	0	0	0	0	0	0	0	0	0
ENSG00000109220	99	95	14	83	109	13	100	127	25	134	112	14
ENSG00000254011	0	0	0	0	0	0	0	0	0	0	0	0
ENSG00000262339	0	0	0	0	0	0	2	0	3	0	2	0
ENSG00000225724	0	0	0	0	0	0	1	0	1	0	0	1
ENSG00000012048	602	414	1033	697	589	1294	1185	835	2892	1570	847	2420
ENSG00000225726	0	0	0	0	0	1	0	1	0	1	1	2
ENSG00000225727	0	0	0	0	0	0	0	0	0	0	0	0
ENSG00000225720	0	0	0	0	0	0	11	2	14	15	5	18
ENSG00000225721	0	0	0	0	0	0	0	0	3	0	0	2
ENSG00000225722	0	0	0	0	0	0	0	0	0	0	0	0
ENSG00000225723	0	0	0	0	0	0	0	0	0	0	0	0
ENSG00000264663	0	0	0	0	0	0	2	3	4	7	7	2
ENSG00000225728	0	0	0	0	0	0	0	0	0	0	0	0
ENSG00000263681	0	0	0	0	0	0	0	0	0	0	0	0
ENSG00000263680	0	0	0	0	0	0	154	61	455	180	66	354
ENSG00000263683	0	0	0	0	0	0	0	0	1	0	0	0
ENSG00000229657	3	0	10	0	2	2	0	0	0	0	0	0
[truncated: 56,148 more rows]
