# Supplementary material for: RNA Modification Level Estimation with pulseR
Source: Genes (Basel). 2018 Dec 10;9(12):619. doi: 10.3390/genes9120619 (PMC6316556; doi:10.3390/genes9120619)
Supplement: Supplementary file 1 [file genes-09-00619-s001.tgz › supplement/mapping/run_laic.txt]

BioSample	Experiment	MBases	MBytes	Run	SRA_Sample	Sample_Name	cell_line	source_name	treatment	Assay_Type	AvgSpotLen	BioProject	Center_Name	Consent	DATASTORE_filetype	DATASTORE_provider	InsertSize	Instrument	LibraryLayout	LibrarySelection	LibrarySource	LoadDate	Organism	Platform	ReleaseDate	SRA_Study
SAMN03354229	SRX883632	2686	1763	SRR1811014	SRS850825	GSM1614080	GM12878	GM12878	supernatant (m6A negative) fraction of m6A-LAIC-seq	RNA-Seq	100	PRJNA275864	GEO	public	sra	ncbi	0	Illumina HiSeq 2000	PAIRED	cDNA	TRANSCRIPTOMIC	2015-02-19	Homo sapiens	ILLUMINA	2016-06-27	SRP055176
SAMN03354222	SRX883636	2845	1862	SRR1811018	SRS850826	GSM1614084	GM12878	GM12878	eluate (m6A positive) fraction of m6A-LAIC-seq	RNA-Seq	100	PRJNA275864	GEO	public	sra	ncbi	0	Illumina HiSeq 2000	PAIRED	cDNA	TRANSCRIPTOMIC	2015-02-19	Homo sapiens	ILLUMINA	2016-06-27	SRP055176
SAMN03354225	SRX883635	3119	2045	SRR1811017	SRS850827	GSM1614083	GM12878	GM12878	supernatant (m6A negative) fraction of m6A-LAIC-seq	RNA-Seq	100	PRJNA275864	GEO	public	sra	ncbi	0	Illumina HiSeq 2000	PAIRED	cDNA	TRANSCRIPTOMIC	2015-02-19	Homo sapiens	ILLUMINA	2016-06-27	SRP055176
SAMN03354230	SRX883634	3557	2322	SRR1811016	SRS850828	GSM1614082	GM12878	GM12878	without antibody treatment	RNA-Seq	100	PRJNA275864	GEO	public	sra	ncbi	0	Illumina HiSeq 2000	PAIRED	cDNA	TRANSCRIPTOMIC	2015-02-19	Homo sapiens	ILLUMINA	2016-06-27	SRP055176
SAMN03354228	SRX883633	3407	2235	SRR1811015	SRS850829	GSM1614081	GM12878	GM12878	eluate (m6A positive) fraction of m6A-LAIC-seq	RNA-Seq	100	PRJNA275864	GEO	public	sra	ncbi	0	Illumina HiSeq 2000	PAIRED	cDNA	TRANSCRIPTOMIC	2015-02-19	Homo sapiens	ILLUMINA	2016-06-27	SRP055176
SAMN03354223	SRX883631	2996	1955	SRR1811013	SRS850830	GSM1614079	GM12878	GM12878	without antibody treatment	RNA-Seq	100	PRJNA275864	GEO	public	sra	ncbi	0	Illumina HiSeq 2000	PAIRED	cDNA	TRANSCRIPTOMIC	2015-02-19	Homo sapiens	ILLUMINA	2016-06-27	SRP055176
SAMN03354226	SRX883630	3300	2161	SRR1811012	SRS850831	GSM1614078	H1-ESC	H1-ESC	eluate (m6A positive) fraction of m6A-LAIC-seq	RNA-Seq	100	PRJNA275864	GEO	public	sra	ncbi	0	Illumina HiSeq 2000	PAIRED	cDNA	TRANSCRIPTOMIC	2015-02-19	Homo sapiens	ILLUMINA	2016-06-27	SRP055176
SAMN03354220	SRX883629	3027	1992	SRR1811011	SRS850832	GSM1614077	H1-ESC	H1-ESC	supernatant (m6A negative) fraction of m6A-LAIC-seq	RNA-Seq	100	PRJNA275864	GEO	public	sra	ncbi	0	Illumina HiSeq 2000	PAIRED	cDNA	TRANSCRIPTOMIC	2015-02-19	Homo sapiens	ILLUMINA	2016-06-27	SRP055176
SAMN03354221	SRX883628	3404	2241	SRR1811010	SRS850833	GSM1614076	H1-ESC	H1-ESC	without antibody treatment	RNA-Seq	100	PRJNA275864	GEO	public	sra	ncbi	0	Illumina HiSeq 2000	PAIRED	cDNA	TRANSCRIPTOMIC	2015-02-19	Homo sapiens	ILLUMINA	2016-06-27	SRP055176
SAMN03354224	SRX883627	3145	2067	SRR1811009	SRS850834	GSM1614075	H1-ESC	H1-ESC	eluate (m6A positive) fraction of m6A-LAIC-seq	RNA-Seq	100	PRJNA275864	GEO	public	sra	ncbi	0	Illumina HiSeq 2000	PAIRED	cDNA	TRANSCRIPTOMIC	2015-02-19	Homo sapiens	ILLUMINA	2016-06-27	SRP055176
SAMN03354227	SRX883626	3296	2165	SRR1811008	SRS850835	GSM1614074	H1-ESC	H1-ESC	supernatant (m6A negative) fraction of m6A-LAIC-seq	RNA-Seq	100	PRJNA275864	GEO	public	sra	ncbi	0	Illumina HiSeq 2000	PAIRED	cDNA	TRANSCRIPTOMIC	2015-02-19	Homo sapiens	ILLUMINA	2016-06-27	SRP055176
SAMN03354219	SRX883625	3338	2191	SRR1811007	SRS850836	GSM1614073	H1-ESC	H1-ESC	without antibody treatment	RNA-Seq	100	PRJNA275864	GEO	public	sra	ncbi	0	Illumina HiSeq 2000	PAIRED	cDNA	TRANSCRIPTOMIC	2015-02-19	Homo sapiens	ILLUMINA	2016-06-27	SRP055176
