# Supplementary material for: RNA Modification Level Estimation with pulseR
Source: Genes (Basel). 2018 Dec 10;9(12):619. doi: 10.3390/genes9120619 (PMC6316556; doi:10.3390/genes9120619)
Supplement: Supplementary file 1 [file genes-09-00619-s001.tgz › supplement/mapping/sra_result.csv]

Experiment Accession	Experiment Title	Organism Name	Instrument	Submitter	Study Accession	Study Title	Sample Accession	Sample Title	Total Size, Mb	Total RUNs	Total Spots	Total Bases	Library Name	Library Strategy	Library Source	Library Selection
SRX883636	GSM1614084: GM12878 rep2 m6A pos; Homo sapiens; RNA-Seq	Homo sapiens	Illumina HiSeq 2000	GEO	SRP055176	m6A level and isoform characterization sequencing (m6A-LAIC-seq) reveal the census and complexity of the m6A epitranscriptome	SRS850826		1862.79	1	29839034	2983903400		RNA-Seq	TRANSCRIPTOMIC	cDNA
SRX883635	GSM1614083: GM12878 rep2 m6A neg; Homo sapiens; RNA-Seq	Homo sapiens	Illumina HiSeq 2000	GEO	SRP055176	m6A level and isoform characterization sequencing (m6A-LAIC-seq) reveal the census and complexity of the m6A epitranscriptome	SRS850827		2045.57	1	32712510	3271251000		RNA-Seq	TRANSCRIPTOMIC	cDNA
SRX883634	GSM1614082: GM12878 rep2 input; Homo sapiens; RNA-Seq	Homo sapiens	Illumina HiSeq 2000	GEO	SRP055176	m6A level and isoform characterization sequencing (m6A-LAIC-seq) reveal the census and complexity of the m6A epitranscriptome	SRS850828		2322.14	1	37307918	3730791800		RNA-Seq	TRANSCRIPTOMIC	cDNA
SRX883633	GSM1614081: GM12878 rep1 m6A pos; Homo sapiens; RNA-Seq	Homo sapiens	Illumina HiSeq 2000	GEO	SRP055176	m6A level and isoform characterization sequencing (m6A-LAIC-seq) reveal the census and complexity of the m6A epitranscriptome	SRS850829		2235.44	1	35732393	3573239300		RNA-Seq	TRANSCRIPTOMIC	cDNA
SRX883632	GSM1614080: GM12878 rep1 m6A neg; Homo sapiens; RNA-Seq	Homo sapiens	Illumina HiSeq 2000	GEO	SRP055176	m6A level and isoform characterization sequencing (m6A-LAIC-seq) reveal the census and complexity of the m6A epitranscriptome	SRS850825		1763.28	1	28169598	2816959800		RNA-Seq	TRANSCRIPTOMIC	cDNA
SRX883631	GSM1614079: GM12878 rep1 input; Homo sapiens; RNA-Seq	Homo sapiens	Illumina HiSeq 2000	GEO	SRP055176	m6A level and isoform characterization sequencing (m6A-LAIC-seq) reveal the census and complexity of the m6A epitranscriptome	SRS850830		1955.29	1	31425568	3142556800		RNA-Seq	TRANSCRIPTOMIC	cDNA
SRX883630	GSM1614078: H1-ESC rep2 m6A pos; Homo sapiens; RNA-Seq	Homo sapiens	Illumina HiSeq 2000	GEO	SRP055176	m6A level and isoform characterization sequencing (m6A-LAIC-seq) reveal the census and complexity of the m6A epitranscriptome	SRS850831		2161.37	1	34606502	3460650200		RNA-Seq	TRANSCRIPTOMIC	cDNA
SRX883629	GSM1614077: H1-ESC rep2 m6A neg; Homo sapiens; RNA-Seq	Homo sapiens	Illumina HiSeq 2000	GEO	SRP055176	m6A level and isoform characterization sequencing (m6A-LAIC-seq) reveal the census and complexity of the m6A epitranscriptome	SRS850832		1992.86	1	31745793	3174579300		RNA-Seq	TRANSCRIPTOMIC	cDNA
SRX883628	GSM1614076: H1-ESC rep2 input; Homo sapiens; RNA-Seq	Homo sapiens	Illumina HiSeq 2000	GEO	SRP055176	m6A level and isoform characterization sequencing (m6A-LAIC-seq) reveal the census and complexity of the m6A epitranscriptome	SRS850833		2241.94	1	35703385	3570338500		RNA-Seq	TRANSCRIPTOMIC	cDNA
SRX883627	GSM1614075: H1-ESC rep1 m6A pos; Homo sapiens; RNA-Seq	Homo sapiens	Illumina HiSeq 2000	GEO	SRP055176	m6A level and isoform characterization sequencing (m6A-LAIC-seq) reveal the census and complexity of the m6A epitranscriptome	SRS850834		2067.25	1	32986296	3298629600		RNA-Seq	TRANSCRIPTOMIC	cDNA
SRX883626	GSM1614074: H1-ESC rep1 m6A neg; Homo sapiens; RNA-Seq	Homo sapiens	Illumina HiSeq 2000	GEO	SRP055176	m6A level and isoform characterization sequencing (m6A-LAIC-seq) reveal the census and complexity of the m6A epitranscriptome	SRS850835		2165.47	1	34570359	3457035900		RNA-Seq	TRANSCRIPTOMIC	cDNA
SRX883625	GSM1614073: H1-ESC rep1 input; Homo sapiens; RNA-Seq	Homo sapiens	Illumina HiSeq 2000	GEO	SRP055176	m6A level and isoform characterization sequencing (m6A-LAIC-seq) reveal the census and complexity of the m6A epitranscriptome	SRS850836		2191.8	1	35011533	3501153300		RNA-Seq	TRANSCRIPTOMIC	cDNA
