# Supplementary material for: RNA Modification Level Estimation with pulseR
Source: Genes (Basel). 2018 Dec 10;9(12):619. doi: 10.3390/genes9120619 (PMC6316556; doi:10.3390/genes9120619)
Supplement: Supplementary file 1 [file genes-09-00619-s001.tgz › supplement/mapping/supplement.xlsx]

## Sheet: INFO
fraction

## Sheet: GM12878
row.names

## Sheet: H1-ESC
row.names

## Sheet: ERCC
row.names

## Sheet: LAIC-seq_level
row.names
